# Supplementary material
Source: PubMed Central journal article supplement (PMC6597300)
Supplement: NIHMS1007203-supplement-Supplementary_materials.pdf [file NIHMS1007203-supplement-Supplementary_materials.pdf]

# Supporting Information

## Contents

### Supporting Materials and Methods

Supporting Fig. S1. Increased TG in KO mice fed with chow diet.

Supporting Fig. S2. Increased hepatic steatosis in HFD-fed mGPDH<sup>+/-</sup> heterozygous mice.

Supporting Fig. S3. mGPDH decreases TG content and lipid droplet accumulation under basal conditions.

Supporting Fig. S4. mGPDH does not affect  $\beta$ -hydroxybutyrate, inflammation and insulin signaling.

Supporting Fig. S5. ER stress induced by mGPDH suppression occurs via Cyp-D-controlled mPTP activation.

Supporting Fig. S6. The effect of mGPDH knockout on MAP Kinases.

Supporting Fig. S7. The effect of mGPDH downregulation on ATP levels and mitochondrial bioenergetics.

Supporting Fig. S8. mGPDH regulates Cyp-D through the ubiquitination-proteasomal degradation pathway.

Supporting Fig. S9. Thyroid hormone receptor is not involved in the suppression of hepatocellular mGPDH under HFD conditions.

Supporting Fig. S10. The effects of mGPDH knockout on hepatic ROS levels.

Supporting Fig. S11. AAV8-mGPDH leads to mGPDH overexpress exclusively in the liver.

Supporting Fig. S12. AAV8-mGPDH does not change serum lipid profiles and  $\beta$ -hydroxybutyrate in NAFLD mice.

Supporting Table S1. List of primers.

Supporting Table S2. All differential expressed genes in mGPDH over-expressed LO2 cells.

Supporting Table S3. Top 10 terms of GO\_BP analysis in mGPDH over-expressed LO2 cells.

Supporting Table S4. Top 10 terms of KEGG analysis for all differentially expressed genes in mGPDH over-expressed LO2 cells.

Supporting Table S5. Differential changed genes regarding "protein processing in endoplasmic reticulum" item of KEGG analysis

## Supporting Materials and Methods

### *Cell lines and treatment*

LO2 cells were purchased from Zhong Qiao Xin Zhou Biotechnology Co.,Ltd., Shanghai, and Huh7 cells were purchased from the Cell Bank of the Chinese Academy of Sciences. Cells were cultured in Dulbecco's modified Eagle's medium (DMEM, Gibco) supplemented with 10% fetal bovine serum (FBS, Excell, China) in a 5% CO<sub>2</sub> incubator at 37°C. All cell identities were confirmed and cultured as recommended by the suppliers. Mycoplasma determination was performed by Shanghai Biowing Applied Biotechnology Co..

The cellular lipid accumulation model was induced by free fatty acid (FFA, including palmitate and oleic acid at a final ratio of 1:2 and a final concentration of 0.2 mM; Sigma-Aldrich), which was added to the medium for 24 h. For knockdown, cells were seeded in 6-well culture plates and transiently transfected with siRNA oligonucleotides at 30 pmol per well with RNAiMAX (Life Technology) according to the manufacturer's instructions. mGPDH-specific, Cyp-D-specific, thyroid receptor (TR) $\alpha$ -specific, TR $\beta$ -specific and corresponding negative control siRNAs were synthesized by QIAGEN and RIBOBIO. For overexpression, cells were seeded in 6-well culture plates and transfected with 1  $\mu$ g plasmid using Lipofectamine 3000 Reagent (Invitrogen) according to the manufacturer's instructions. pCMV3-N-GFPspark-mGPDH and control vector plasmids were generated by Sino Biological. Insulin and tauroursodeoxycholic acid (TUDCA) were purchased from Sigma-Aldrich. 1,2-bis(2-aminophenoxy) ethane N,N,N',N'-tetraacetic acid acetoxymethyl ester (BAPTA-AM) was purchased from TCI, and cyclosporine A (CsA) was purchased from Aladdin. MG-132 was purchased from Santa Cruz Biotechnology.

### *RNA-seq analysis*

Total RNA was harvested from cells with Trizol (Takara) and quantified by a NanoDrop2000. RNA integrity and gDNA contamination were tested by denaturing agarose gel electrophoresis, and the sequencing library was determined by an Agilent 2100 Bioanalyzer using the Agilent DNA 1000 Chip Kit (Agilent). RNA-seq analyses were performed by KangChen Biotech., Shanghai, using the Illumina HiSeq 4000 platform.

### *Mitochondrial calcium flux assays*

Mitochondria were isolated using a mitochondria isolation kit (Mitochondrial Isolation Kit, Beyotime) following the manufacturer's recommendations. Mitochondria (2 mg protein/ml) and the calcium-sensitive dye Arsenazo III (30  $\mu$ M) were added to a medium containing mannitol (195 mM), sucrose (25 mM), Hepes (40 mM at pH 7.2),  $\text{CaCl}_2$  (60 nmol mg/protein) and rotenone (13  $\mu$ M). Potassium succinate (3.33 mM) and FCCP (1  $\mu$ M) were used to induce influx and efflux. Calcium flux was estimated by monitoring the difference in the absorbance of Arsenazo III between 675 nm and 685 nm according to a previously described method.<sup>(1, 2)</sup>

### ***Ubiquitination and half-life assays***

Ubiquitination and half-life assays were performed according to our previous protocol.<sup>(3)</sup> Briefly, for the ubiquitination assay, cells were transfected by an mGPDH plasmid with hemagglutinin (HA)-tagged ubiquitin for 24 h and then treated with FFA and MG-132 (10  $\mu$ M). Cells were harvested, and the lysates were incubated with anti-Cyp-D antibody at 4 °C overnight. Immunoprecipitated proteins were analyzed by immunoblotting with an antibody directed against the HA epitope. To measure Cyp-D protein half-life, cells were treated with mGPDH plasmid and FFA, and then cycloheximide (CHX, 25  $\mu$ M) was added to block protein synthesis. Total lysates were collected at the indicated time points after CHX administration and subjected to immunoblot analysis.

### ***mGPDH activity and G3P content assays***

Mitochondria were isolated using a mitochondria isolation kit (Mitochondrial Isolation Kit, Beyotime) following the manufacturer's recommendations. mGPDH activity was detected using 2,6-dichloroindophenol (DCIP, Sigma) as the electron acceptor, and the loss of absorbance at 600 nm was measured. The reaction buffer consisted of 50 mM  $\text{KH}_2\text{PO}_4/\text{K}_2\text{HPO}_4$  buffer (pH 7.5), 9.3  $\mu$ M antimycin A, 5  $\mu$ M rotenone and 50  $\mu$ M DCIP. G3P content was determined using the G3P Colorimetric Assay Kit (Abnova) according to its protocol.

### ***Metabolic and liver function assays***

Levels of TG, total cholesterol (TC), nonesterified fatty acid (NEFA), low-density lipoprotein cholesterol (LDL), high-density lipoprotein cholesterol (HDL), alanine aminotransferase (ALT) and aspartate aminotransferase (AST) were measured using corresponding commercial determination kits (all from Nanjing Jiancheng) with liver tissue or serum samples. Serum  $\beta$ -hydroxybutyric acid

concentrations were measured using an ELISA kit from MSK Bio. Cellular TG levels were measured using a commercial TG Quantification Colorimetric Kit (Biovision) according to the manufacturer's protocol.

### ***Western blot and antibodies***

For protein extraction, cells were lysed in sample buffer (50 mM Tris-HCl [pH 6.8], 2% SDS, 10% glycerol, 100 mM dithiothreitol, and 0.1% bromophenol blue), tissue lysates were prepared as previously described,<sup>(3)</sup> and protein concentrations were measured using the BCA Protein Assay Kit (Beyotime). Extracted protein lysates were resolved by SDS-PAGE and immunoblotted with the indicated primary antibodies (1:500-1:10,000) and their corresponding HRP-conjugated secondary antibodies. Blots were developed with chemiluminescent HRP substrate (Millipore) and imaged using a fusion FX5s system (Vilber Lourmat). The following antibodies were used: mGPDH (D-12), GAPDH (V-18),  $\beta$ -actin (C-2), ATF4 (B-3), TR $\alpha$ 1/ $\beta$ 1 (C1), and FASN (G-11) from Santa-Cruz Biotechnology; Akt, p-Akt (Ser473), IRS1, p-IRS1 (Ser307), eIF2 $\alpha$ , p-eIF2 $\alpha$  (Ser51), XBP1s, CHOP, VDAC, p38 (L53F8), p-p38 (D3F9), ERK (137F5), p-ERK (20G11) and p-JNK (81E11) from Cell Signaling Technology; OTC from Proteintech; and mGPDH, Cyp-D and ANT-1 from Abcam.

### ***Hematoxylin and eosin (H&E), oil red o and immunohistochemical (IHC) analyses***

H&E, oil red o and IHC staining were carried out as we previously described.<sup>(3, 4)</sup> Briefly, for H&E analysis, tissue sections were prepared using paraffin, and these paraffinized sections were subjected to H&E staining. For oil red o analysis, tissue sections were prepared using the Tissue-Tek OCT compound (Sakura Finetek), and cells were fixed in formaldehyde solution. These frozen liver sections or fixed cells were subjected to oil red o staining. For IHC staining, tissue sections were prepared using paraffin, and these paraffinized sections were subjected to IHC staining using indicated antibodies. Digital images were obtained with a light microscope (Olympus).

### ***ROS assay***

ROS levels were measured in fresh liver tissue by using a ROS assay kit (GENMED SCIENTIFICS INC. U.S.A) according to the manufacturer's instructions. We also performed DHE and MitoSox Red staining in frozen liver sections to measure ROS levels according to a previous description.<sup>(5, 6)</sup> Briefly, cryosections of livers were rehydrated in PBS and then incubated in dihydroethidium (DHE, Invitrogen)

or MitoSox Red (Invitrogen) solution, washed with PBS and placed on coverslips. Images were acquired using a fluorescence microscope (Olympus).

### ***ATP content and cell oxygen consumption rate (OCR) measurement***

The ATP contents in liver tissue were assessed according to the manufacturer's instructions (Beyotime). The bioenergetics of isolated mitochondria was measured using a Seahorse XF96 extracellular flux analyzer (Seahorse Biosciences) according to previous literature<sup>(7)</sup> with modifications. In brief, isolated mouse liver mitochondria were seeded in each well of an XF 96-well microplates (Seahorse Bioscience). After obtaining a baseline measurement, the OCR was measured after the sequential addition of 1  $\mu$ M oligomycin, 1.5  $\mu$ M FCCP, 1  $\mu$ M rotenone plus 1  $\mu$ M antimycin A, and 10 mM G3P. Basal, maximal and G3P stimulated respiration were calculated at baseline and after FCCP and G3P injection, respectively.

### ***Human tissues***

The experimental protocols were approved by the Ethics Committee of Xinqiao Hospital, and were consistent with the Declaration of Helsinki (clinical trial register no. ChiCTR-ROC-17010719). All samples were collected from patients hospitalized at Chongqing Medical University, and written consent was obtained from each participant. The procedure was carried out in a manner similar to that in our previous study.<sup>(4)</sup> Briefly, liver samples were obtained from individuals with NAFLD who underwent percutaneous liver biopsy, and control samples were collected from liver transplant donors. The diagnostic criteria for NAFLD were as follows: i) performed a physical examination, laboratory investigation, and liver biopsy. ii) Other causes of liver disease were ruled out, such as current or past excessive alcohol consumption (defined as average daily consumption of alcohol > 20 g for males or > 10 g for females), chronic hepatitis C or B, autoimmune, celiac disease, genetic disorders based on self-reports, or if laboratory and/or histopathological data showed causes of liver disease other than NAFLD. All liver specimens were snap frozen after resection and stored at -80 °C.

## **Supporting figure legend**

**Supporting Fig. S1. Increased TG in KO mice fed with chow diet.** (A-F) Liver-specific mGPDH knockout (KO) and cre-control (control) mice were fed with chow diet. Hepatic mGPDH mRNA (left)

and protein (right) expression levels were detected by qRT-PCR and western blot, respectively (A). The body weight (BW) (left) and ratio of liver weight to BW (LW/BW) (right) (B), liver lipid content (TG, TC and NEFA) (C), serum lipid profiles (TG, TC, LDL, HDL and NEFA) (D),  $\beta$ -hydroxybutyric acid (E), and H&E and oil red o staining of liver sections (F) were determined. Scale bar: 200 or 100  $\mu$ m.  $n = 6$  mice per group. Data are presented as the mean  $\pm$  S.E.M. \* $P < 0.05$ , \*\*\* $P < 0.001$ .

**Supporting Fig. S2. Increased hepatic steatosis in HFD-fed mGPDH<sup>+/-</sup> heterozygous mice.** (A) mRNA (upper panel) and protein (lower panel) expression of mGPDH in liver-specific hemizygous mGPDH knockout mice (KO/+). (B) mRNA (upper panel) and protein (lower panel) in mice fed the HFD for 12 weeks HFD. (C-G) KO/+ and cre-control (control) mice were fed with HFD for 12 weeks, BW and LW/BW (C), liver lipid content (TG, TC and NEFA) (D), serum lipid profiles (TG, TC, LDL, HDL and NEFA) (E), serum levels of  $\beta$ -hydroxybutyric acid (F), and H&E and oil red o staining of liver sections (G) were shown. Scale bar: 200 or 100  $\mu$ m.  $n = 4$  mice per group for A,C-G,  $n = 6$  mice per group for B. Data are presented as the mean  $\pm$  S.E.M. \* $P < 0.05$ , \*\*\* $P < 0.001$ .

**Supporting Fig. S3. mGPDH decreases TG content and lipid droplet accumulation under basal conditions.** (A and B) LO2 and Huh7 cells were transfected with siRNA or plasmid for mGPDH inhibition or overexpression, the TG contents of treated cells were determined enzymatically (A), and oil red o staining is shown (B).  $n = 3$ . Scale bar: 20  $\mu$ m. Data are presented as the mean  $\pm$  S.E.M. \* $P < 0.05$ .

**Supporting Fig. S4. mGPDH does not affect  $\beta$ -hydroxybutyrate, inflammation and insulin signaling.** (A-C) LO2 cells were transfected with siRNA or plasmid for mGPDH and then treated with FFA for 24 h.  $\beta$ -hydroxybutyric acid concentrations were determined enzymatically (A). The mRNA levels of genes related to inflammation (IL-1 $\beta$ , TNF $\alpha$ , MCP-1 and IL-10) were determined by qRT-PCR in treated LO2 cells and KO and control mice fed with HFD (B). The expression of proteins related to insulin signaling (p-IRS1 and p-AKT) was detected by western blot in LO2 cells (C).  $n = 3$  for cells,  $n = 6$  for mice. Data are presented as the mean  $\pm$  S.E.M. n.s., not significant.

**Supporting Fig. S5. ER stress induced by mGPDH suppression occurs via Cyp-D-controlled mPTP activation.** (A) LO2 cells transfected with mGPDH siRNA were treated with FFA and BAPTA-AM (25  $\mu$ M) for 24 h, and ER stress markers were determined. (B and C) LO2 cells transfected with mGPDH siRNA or plasmid were treated with FFA for 24 h. Mitochondrial Ca<sup>2+</sup> uptake (B) and

release (C) were determined using arsenazo III. (D) LO2 cells transfected with mGPDH siRNA were treated with FFA and CsA (2.5  $\mu$ M) for 24 h, and ER stress markers were determined. (E and F) LO2 cells were transfected with mGPDH siRNA or plasmid and then treated with FFA for 24 h. The mRNA (E) and protein (F) expressions of Cyp-D, ANT-1 and VDAC were determined. (G and H) LO2 cells were treated with FFA for 24 h and G3P (10 mM) during the last 10 min. The protein expression of Cyp-D (G) and mRNA levels of ER stress markers (H) were shown. (I) Cyp-D protein levels were assessed in KO and control mice fed with HFD. (J) LO2 cells cotransfected with mGPDH siRNA and Cyp-D siRNA were treated with FFA for 24 h, and ER stress markers were determined. (K-N) KO and control mice were fed with HFD for 8 weeks and injected with AAV8-Cyp-D-shRNA at the fifth week of HFD feeding via the tail vein. ER stress markers (K), LW/BW (L), liver lipid contents (M), and H&E and oil red o staining of liver sections (N) were shown. Scale bars: 100  $\mu$ m.  $n = 6$  mice per group for I,  $n = 4$  mice per group for K-N,  $n = 3$  for A-H and J. Data are presented as the mean  $\pm$  S.E.M. \*  $P < 0.05$ , \*\*  $P < 0.01$ , \*\*\*  $P < 0.001$ , n.s., not significant.

**Supporting Fig. S6. The effect of mGPDH knockout on MAP Kinases.** KO and control mice fed with HFD, and the MAP Kinases in livers were determined by western blot.  $n = 6$  mice per group. Data are presented as the mean  $\pm$  S.E.M.

**Supporting Fig. S7. The effect of mGPDH downregulation on ATP levels and mitochondrial bioenergetics.** (A) Hepatic ATP content of KO and control mice fed with HFD. (B) The mitochondria were isolated from KO and control mice fed with HFD, and the oxygen consumption rate (OCR) was measured in the presence of oligomycin (Oligo), FCCP, rotenone (Rot) and antimycin (AA), and glycerol-3-phosphate (G3P).  $n = 6$  for A,  $n = 10$  for B. Data are presented as the mean  $\pm$  S.E.M. \*  $P < 0.05$ , \*\*\*  $P < 0.001$ .

**Supporting Fig. S8. mGPDH regulates Cyp-D through the ubiquitination-proteasomal degradation pathway.** (A-C) LO2 cells were transfected by mGPDH and hemagglutinin (HA)-tagged ubiquitin (Ub) plasmids as indicated and then treated with FFA for 24 h and the proteasomal inhibitor MG-132 (10  $\mu$ M) during the last 4 h. Cyp-D protein (A) and ubiquitination (B) were detected by immunoblotting and immunoprecipitation analysis. The half-life of the Cyp-D protein was determined

by pulse-chase assay with protein synthesis inhibitor CHX (25  $\mu$ M) administration (C).  $n = 3$  for A-C. Data are presented as the mean  $\pm$  S.E.M. \* $P < 0.05$ , n.s., not significant.

**Supporting Fig. S9. Thyroid hormone receptor is not involved in the suppression of hepatocellular mGPDH under HFD conditions.** (A-C) Serum thyroid hormone (T3, T4 and TSH) levels (A) and the mRNA (B) and protein (C) expression of thyroid hormone receptors (TRs, TR $\alpha$  and TR $\beta$ ) were measured by using thyroid hormone assay kits, qRT-PCR and western blot in ob/ob mice. (D-F) Serum thyroid hormone levels (D) and the mRNA (E) and protein (F) expression of TRs were measured in HFD-fed mice. (G) C57BL/6J mice were treated with saline (Veh) or TR antagonist 1-850 (10 nmol per mouse per day) for 20 days, and mGPDH mRNA levels were determined. (H) LO2 cells were transfected with siRNA for TR $\alpha$  or TR $\beta$  and then treated with or without FFA for 24 h; mRNA levels of mGPDH were assessed by qRT-PCR.  $n = 6$  mice per group for A-G,  $n = 3$  for H. Data are presented as the mean  $\pm$  S.E.M. \* $P < 0.05$ , \*\* $P < 0.01$ , \*\*\* $P < 0.001$ , n.s., not significant.

**Supporting Fig. S10. The effects of mGPDH knockout on hepatic ROS levels.** (A and B) ROS levels in fresh liver tissue and cryosections were tested by using a ROS assay kit (A) and performing DHE and MitoSox Red staining (B) in normal chow (NC)- and HFD-fed C57BL/6J mice. (C and D) ROS levels in fresh liver tissue and cryosections were tested by using a ROS assay kit (C) and performing DHE and MitoSox Red staining (D) in NC- and HFD-fed liver-specific mGPDH KO and control mice. Scale bar: 100  $\mu$ m.  $n = 6$  mice per group. Data are presented as the mean  $\pm$  S.E.M. \* $P < 0.05$ , \*\*\* $P < 0.001$ .

**Supporting Fig. S11. AAV8-mGPDH leads to mGPDH overexpress exclusively in the liver.** (A-C) Eight-week-old ob/ob mice were injected with AAV8-mGPDH (mGPDH) or AAV8-GFP (Veh) via the tail vein. Eight weeks later, the mRNA (A and B) and protein (C) expression of mGPDH in the indicated tissues or livers was determined by qRT-PCR and western blot. (D-F) C57BL/6J mice were fed with HFD for 12 weeks, and at the fifth week of HFD feeding were injected with AAV8-mGPDH or Veh via the tail vein. The mRNA (D and E) and protein (F) expression of mGPDH in the indicated tissues or livers is shown.  $n = 6$  mice per group for A-C,  $n = 5$  mice per group for D-F. Data are presented as the mean  $\pm$  S.E.M. \*\* $P < 0.01$ , \*\*\* $P < 0.001$  compared with the Veh group.

**Supporting Fig. S12. AAV8-mGPDH does not change serum lipid profiles and  $\beta$ -hydroxybutyrate in NAFLD mice.** (A and B) Eight-week-old ob/ob mice were injected with AAV8-mGPDH (mGPDH)



and AAV8-GFP (Veh) via the tail vein. Eight weeks later, serum lipid profiles (A) and  $\beta$ -hydroxybutyrate concentrations (B) were determined enzymatically. (C and D) C57BL/6J mice were fed with HFD for 12 weeks and at the fifth week of HFD feeding were injected with AAV8-mGPDH or Veh via the tail vein. Serum lipid profiles (C) and  $\beta$ -hydroxybutyrate concentrations (D) were tested.  $n = 6$  per group for A and B,  $n = 5$  per group for C and D. Data are presented as the mean  $\pm$  S.E.M.

## References in supporting information

1. Xu W, Liu L, Charles IG, Moncada S. Nitric oxide induces coupling of mitochondrial signalling with the endoplasmic reticulum stress response. *Nature Cell Biology* 2004;6:1129-1134.
2. Andrade Pires AD, Jabor GG, Rodrigues NG, Echevarria A, Moretto RC, Merlin Rocha ME, et al. Antioxidant effect of 1,3,4-thiadiazolium mesoionic derivatives on isolated mitochondria. *European Journal of Pharmacology* 2016;770:78-84.
3. Wang H, Liu X, Long M, Huang Y, Zhang L, Zhang R, et al. NRF2 activation by antioxidant antidiabetic agents accelerates tumor metastasis. *Sci Transl Med* 2016;8:334ra351.
4. Liao X, Song L, Zhang L, Wang H, Tong Q, Xu J, et al. LAMP3 regulates hepatic lipid metabolism through activating PI3K/Akt pathway. *Molecular and Cellular Endocrinology* 2018;470:160-167.
5. Kohli R, Kirby M, Xanthakos SA, Softic S, Feldstein AE, Saxena V, et al. High-fructose, medium chain trans fat diet induces liver fibrosis and elevates plasma coenzyme Q9 in a novel murine model of obesity and nonalcoholic steatohepatitis. *Hepatology* 2010;52:934-944.
6. Wang X, Du H, Shao S, Bo T, Yu C, Chen W, et al. Cyclophilin D deficiency attenuates mitochondrial perturbation and ameliorates hepatic steatosis. *Hepatology* 2018;68:62-77.
7. Figarola JL, Singhal J, Tompkins JD, Rogers GW, Warden C, Horne D, et al. SR4 Uncouples Mitochondrial Oxidative Phosphorylation, Modulates AMP-dependent Kinase (AMPK)-Mammalian Target of Rapamycin (mTOR) Signaling, and Inhibits Proliferation of HepG2 Hepatocarcinoma Cells. *J Biol Chem* 2015;290:30321-30341.

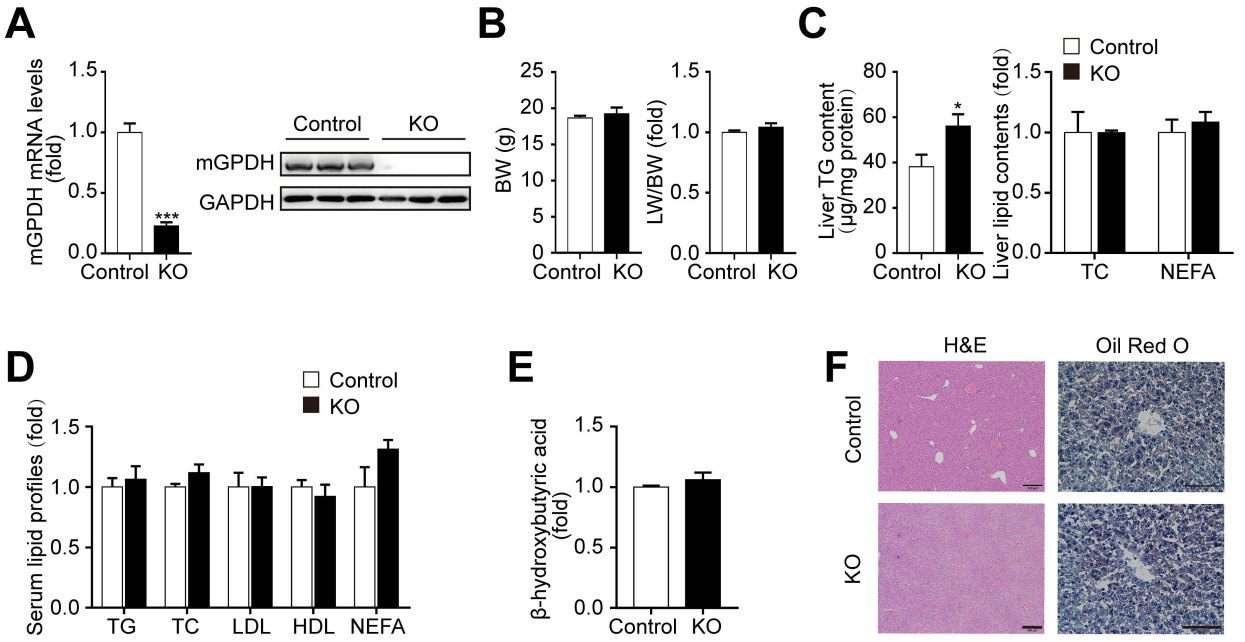

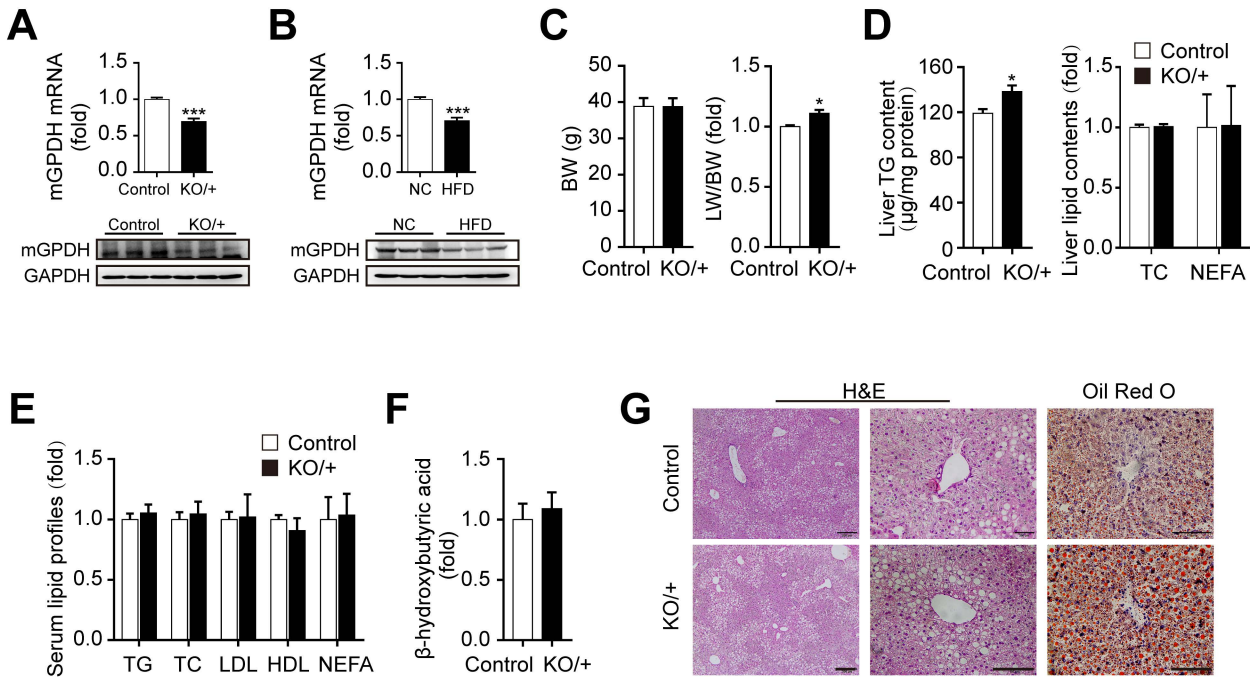

**A**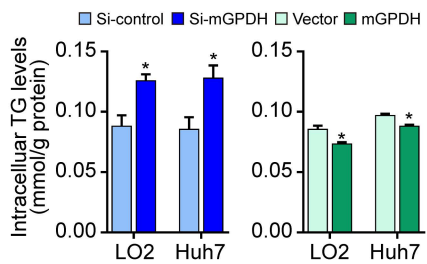**B**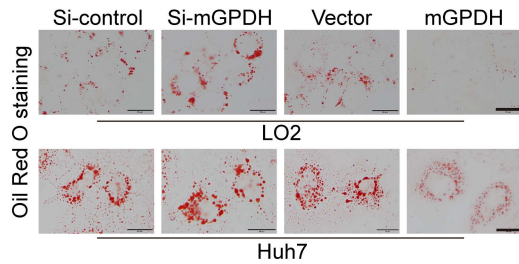



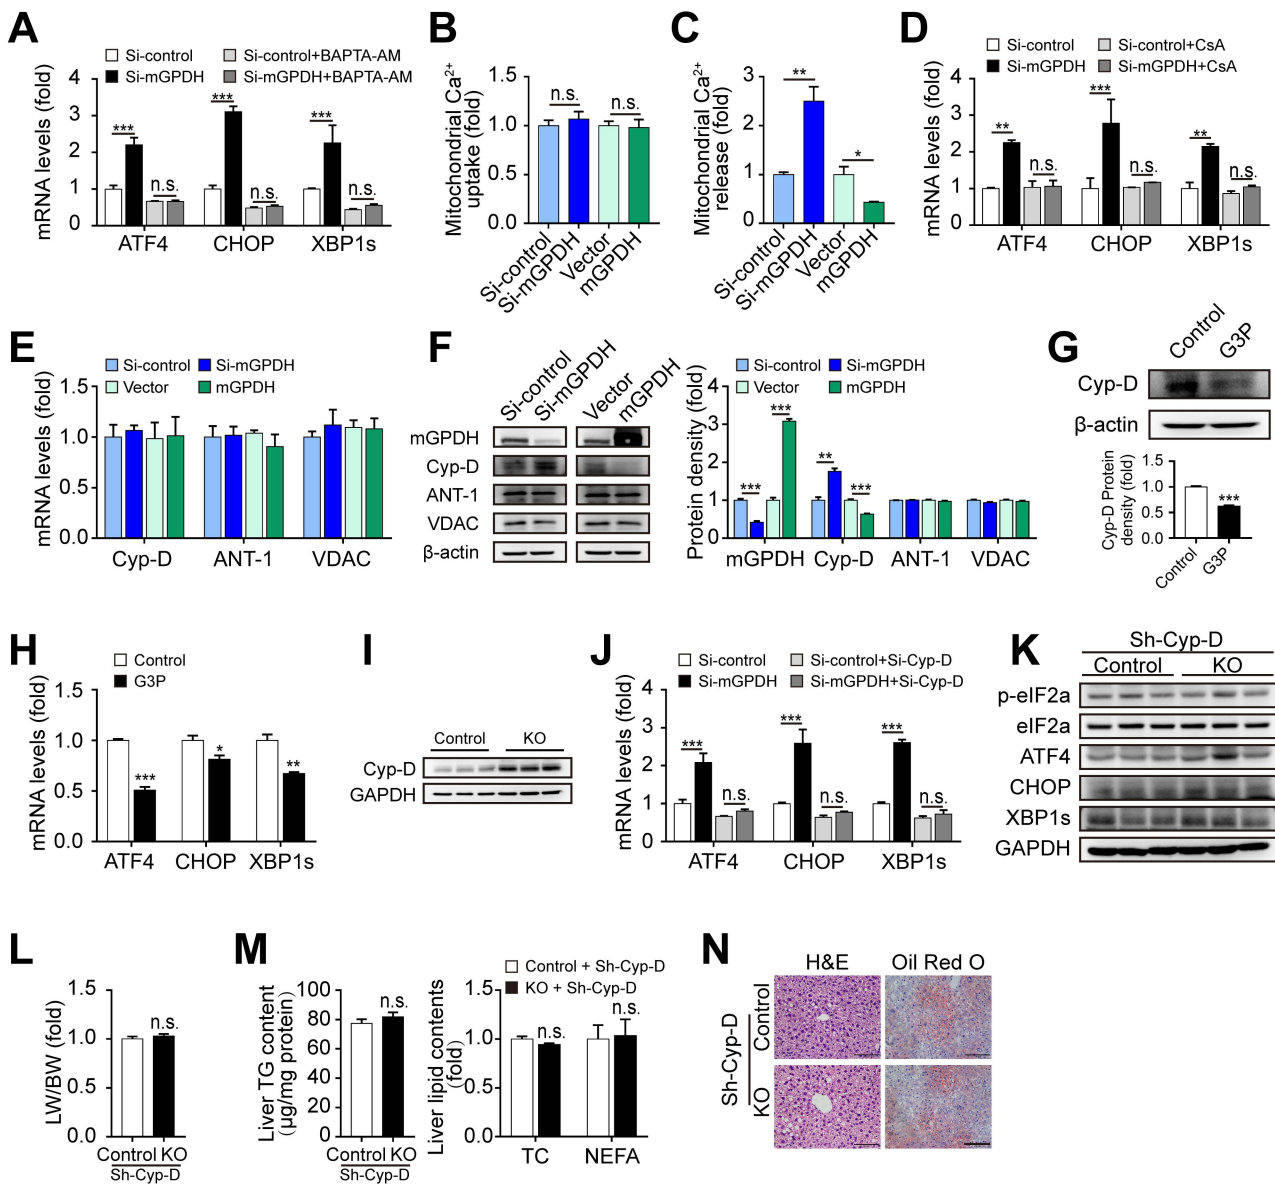

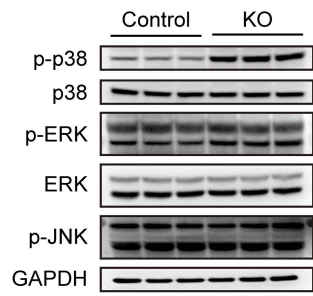

**A**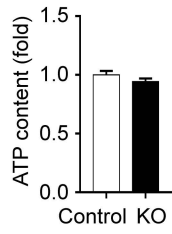**B**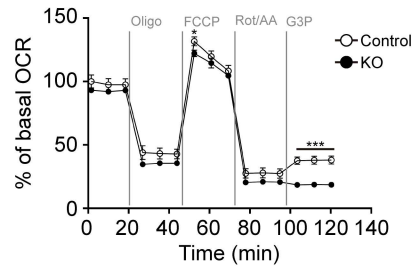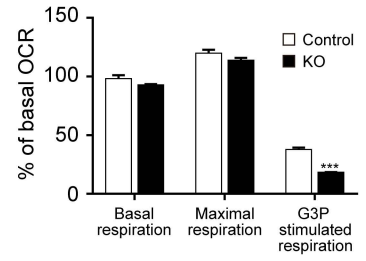



**A**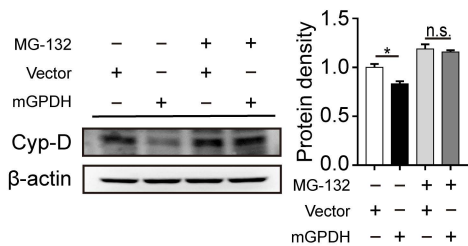**B**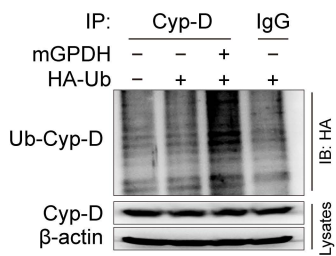**C**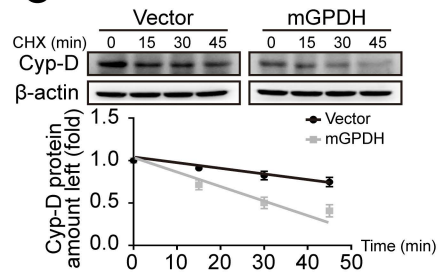

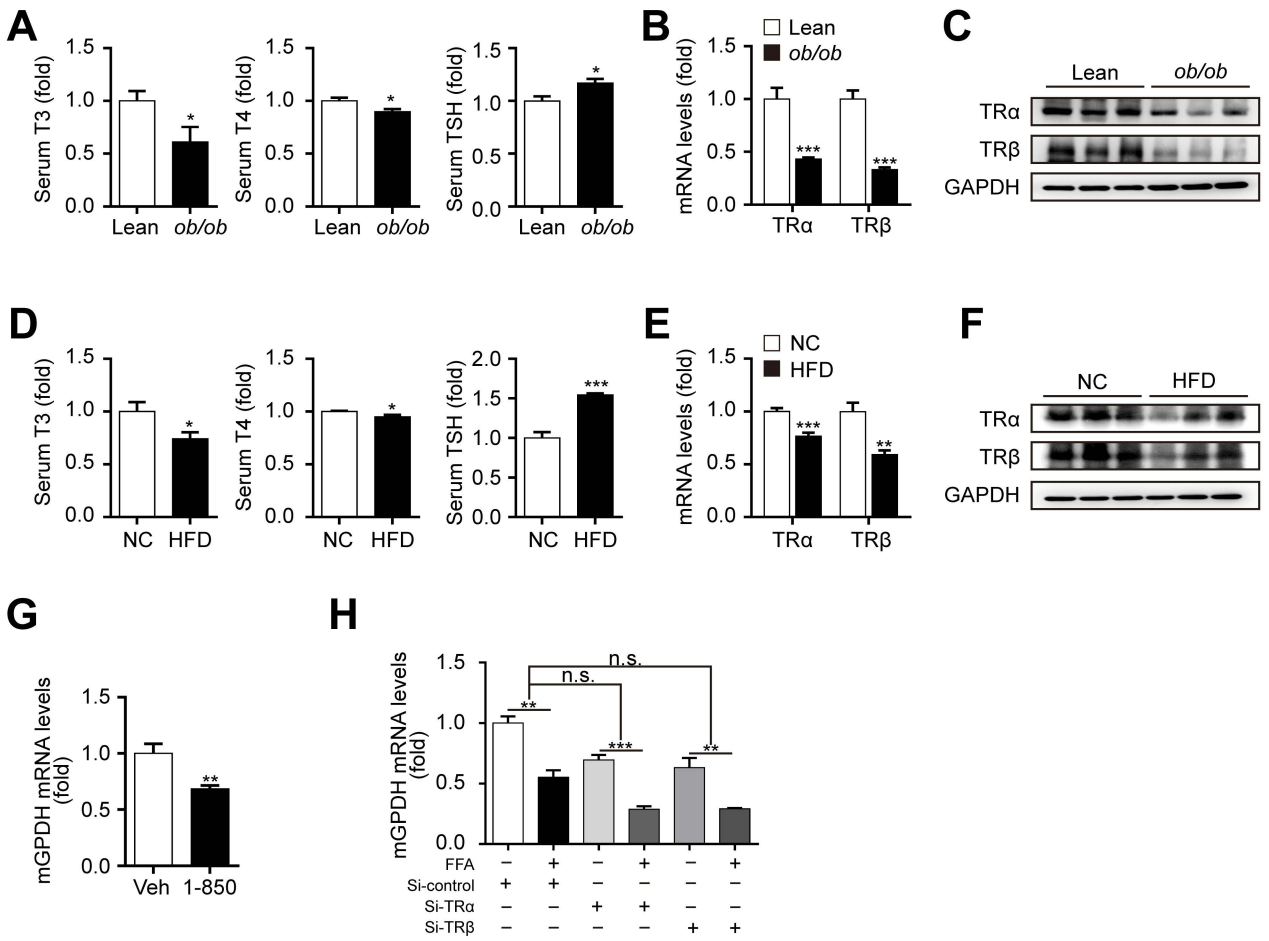

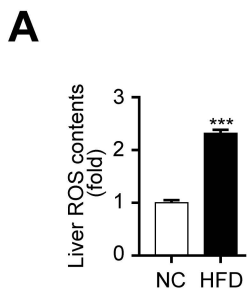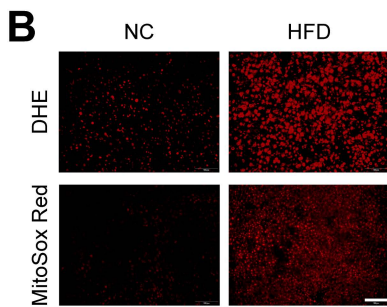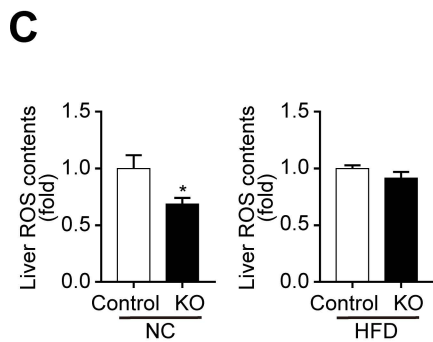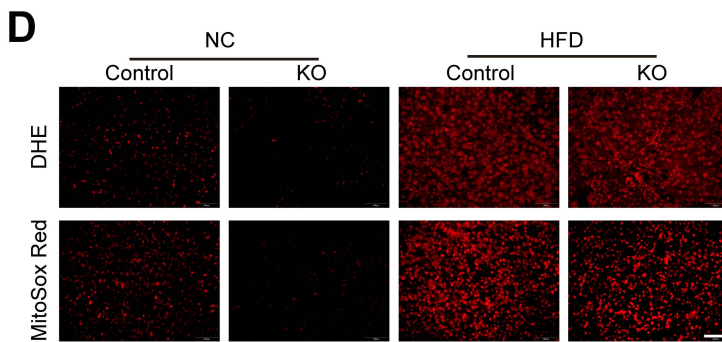

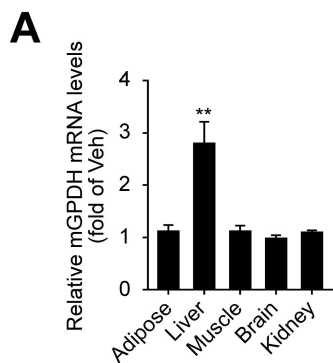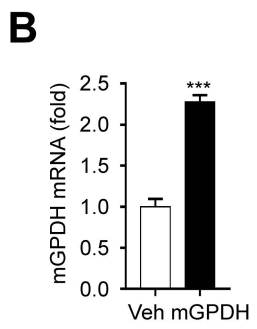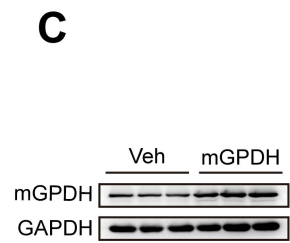

*ob/ob*

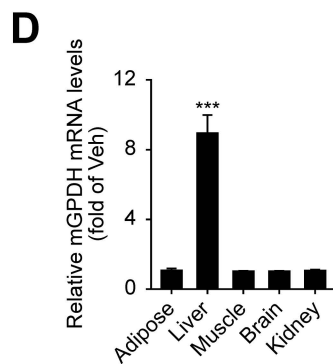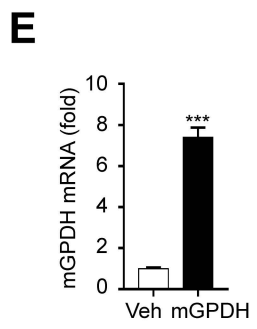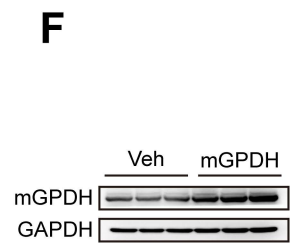

HFD

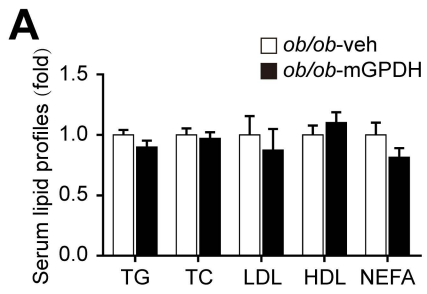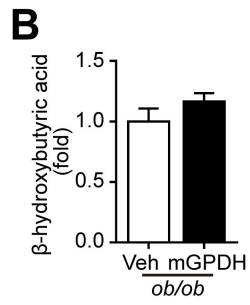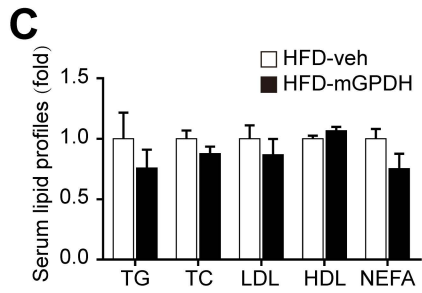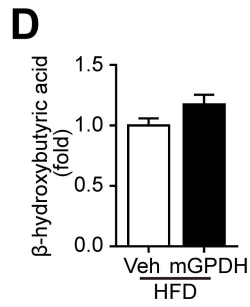

**Supporting Table S1. List of primers.**

| <b>Primers</b>                    |         |                         |
|-----------------------------------|---------|-------------------------|
| <b>m-mGPDH</b>                    | Forward | TTTCTTCTTGCCTTGGGAGA    |
|                                   | Reverse | AGTTCCGCACTTCATTCAGG    |
| <b>h-mGPDH</b>                    | Forward | CGGACAACATAACGATGCAC    |
|                                   | Reverse | CTGTCTGGGGGTCTGTCTTC    |
| <b>m-GAPDH</b>                    | Forward | TGAACGGGAAGCTCACTG      |
|                                   | Reverse | TCCACCACCCTGTTGCTG      |
| <b>h-GAPDH</b>                    | Forward | GGGTGTGAACCACGAGAAAT    |
|                                   | Reverse | CCTTCCACAATGCCAAAGTT    |
| <b>m-PPAR<math>\gamma</math></b>  | Forward | TGGACACCATACTTGAGCAGA   |
|                                   | Reverse | CAGGAGCAGAGCAAAGAGGT    |
| <b>h-PPAR<math>\gamma</math></b>  | Forward | CATAAAGTCCTTCCCGCTGA    |
|                                   | Reverse | TCTGTGATCTCCTGCACAGC    |
| <b>m-SREBP1c</b>                  | Forward | CACTTCTGGAGACATCGCAAAC  |
|                                   | Reverse | ATGGTAGACAACAGCCGCATC   |
| <b>h-SREBP1c</b>                  | Forward | TGAGGACAGCAAGGCAAAG     |
|                                   | Reverse | CAGGACAGGCAGAGGAAGAC    |
| <b>m-ACACA</b>                    | Forward | CGAAGGGCTTACATTGCCTA    |
|                                   | Reverse | GGATGTTCCCTCTGTTTGGA    |
| <b>h-ACACA</b>                    | Forward | TTCTGCACACGTTTCCTTGTC   |
|                                   | Reverse | TGCAGCAGCAACACTGAAAT    |
| <b>m-FASN</b>                     | Forward | AAGTTGCCCGAGTCAGAGAA    |
|                                   | Reverse | GACCGCTTGGGTAATCCATA    |
| <b>h-FASN</b>                     | Forward | GTCCACCAGCAACATCAGC     |
|                                   | Reverse | GTTCTCCAGCAAGCCATCTC    |
| <b>m-SCD-1</b>                    | Forward | TGTCTCGGTGTGTGTCGGAGT   |
|                                   | Reverse | TGTACCACTACCTGCCTGCATG  |
| <b>h-SCD-1</b>                    | Forward | TCCAGAGGAGGTACTACAAACCT |
|                                   | Reverse | GCACCACAGCATATCGCAAG    |
| <b>m-PGC-1<math>\alpha</math></b> | Forward | TCTCAGTAAGGGGCTGGTTG    |
|                                   | Reverse | TTCCGATTGGTCGCTACACC    |
| <b>h-PGC-1<math>\alpha</math></b> | Forward | TCCTTTGGGGTCTTTGAGAA    |
|                                   | Reverse | GGCACGCAATCCTATTCATT    |

|                                   |         |                       |
|-----------------------------------|---------|-----------------------|
| <b>m-ACOX1</b>                    | Forward | CTGCGGTCCCTTGACCTTTT  |
|                                   | Reverse | TGCATCCATTTCTCCTGCTGA |
| <b>h-ACOX1</b>                    | Forward | CTGTGAGGCACCAGTCTGAA  |
|                                   | Reverse | AGGTGAAAGCCTTCAGTCCA  |
| <b>m-CPT-1<math>\alpha</math></b> | Forward | TCAAGCCAGACGAAGAACATC |
|                                   | Reverse | TGGTAGGAGAGCAGCACCTT  |
| <b>h-CPT-1<math>\alpha</math></b> | Forward | GCACATCGTCGTGTACCATC  |
|                                   | Reverse | AATAGGCCTGACGACACCTG  |
| <b>m-CD36</b>                     | Forward | ATTCCCTTGCCAACCAACCA  |
|                                   | Reverse | CAGCCAGGACTGCACCAATA  |
| <b>h-CD36</b>                     | Forward | ACGCTGAGGACAACACAGTCT |
|                                   | Reverse | GCCACAGCCAGATTGAGAAC  |
| <b>m-FATP1</b>                    | Forward | ACTCTGCAAAGGGCTCATCC  |
|                                   | Reverse | GCACGCATGCTGTAGGAATG  |
| <b>h-FATP1</b>                    | Forward | ACGCGATATACCAGGAGCTG  |
|                                   | Reverse | ATCTTGAAGGTGCCTGTGGT  |
| <b>m-Apoa4</b>                    | Forward | GCCTGAGGGAGAAGGTCAAC  |
|                                   | Reverse | CTCTCCAGAGGTTTGGGCTG  |
| <b>h-Apoa4</b>                    | Forward | GAACGTGGAGGAGCTCAAGG  |
|                                   | Reverse | CCTGCGTGTCTGAGCATAG   |
| <b>m-MTTP</b>                     | Forward | GCGGGAATGGTTAGTGGCTA  |
|                                   | Reverse | GAGCCTCCAGGTTGTCCTTC  |
| <b>h-MTTP</b>                     | Forward | CTTCCTGGCCTTCATTCAGC  |
|                                   | Reverse | AGCAGAGGTGACAGCATCCA  |
| <b>m-IL-1<math>\beta</math></b>   | Forward | CCAGGATGAGGACATGAGCA  |
|                                   | Reverse | CGGAGCCTGTAGTGCAGTTG  |
| <b>h-IL-1<math>\beta</math></b>   | Forward | CCACAGACCTTCCAGGAGAA  |
|                                   | Reverse | GTGATCGTACAGGTGCATCG  |
| <b>m-TNF<math>\alpha</math></b>   | Forward | ACTGGCAGAAGAGGCACTCC  |
|                                   | Reverse | GCCACAAGCAGGAATGAGAA  |
| <b>h-TNF<math>\alpha</math></b>   | Forward | GGCGTGGAGCTGAGAGATAA  |
|                                   | Reverse | TTGATGGCAGAGAGGAGGTT  |
| <b>m-MCP-1</b>                    | Forward | ACAAGAGGATCACCAGCAGC  |
|                                   | Reverse | GGACCCATTCTTCTTGGGG   |

|                |         |                            |
|----------------|---------|----------------------------|
| <b>h-MCP-1</b> | Forward | ATAGCAGCCACCTTCATTCC       |
|                | Reverse | CGAGCCTCTGCACTGAGAT        |
| <b>m-IL-10</b> | Forward | AGGCGCTGTCATCGATTCT        |
|                | Reverse | AGGAAGAACCCCTCCCATCA       |
| <b>h-IL-10</b> | Forward | CTGCCTAACATGCTTCGAGA       |
|                | Reverse | CCCTTAAAGTCTCCAGCAA        |
| <b>m-ATF4</b>  | Forward | CATGACCGAGATGAGCTTCCTGAAC  |
|                | Reverse | CCGCCTTGTCGCTGGAGAAC       |
| <b>h-ATF4</b>  | Forward | TCCAACAACAGCAAGGAGGA       |
|                | Reverse | CCAACGTGGTCAGAAGGTCA       |
| <b>m-CHOP</b>  | Forward | CCAACAGAGGTCACACGCACATC    |
|                | Reverse | TCGTTCTCCTGCTCCTTCTCCTTC   |
| <b>h-CHOP</b>  | Forward | TTCTCTGGCTTGGCTGACTG       |
|                | Reverse | TCCTCCTTCTCCTCCTGAGC       |
| <b>m-XBP1s</b> | Forward | AGAACCAGGAGTTAAGAACACGCTTG |
|                | Reverse | GAGGCAACAGTGTCAGAGTCCATG   |
| <b>h-XBP1s</b> | Forward | GGCATTCTGGACAACCTGGA       |
|                | Reverse | GGAGGCTGGTAAGGAACTGG       |
| <b>h-ATF6</b>  | Forward | CAGTCTCGTCTCCTCGGTCA       |
|                | Reverse | AGTGGCTCCGCTGAAGAGAG       |
| <b>m-Cyp-D</b> | Forward | TGGCTCTCAGTTCTTTATCTGC     |
|                | Reverse | ACATCCATGCCCTCTTTGAC       |
| <b>h-Cyp-D</b> | Forward | CCAAAGACAGCTGAGAACTTCA     |
|                | Reverse | GTGCTTCAGTGTAAGTTCTCG      |
| <b>m-VDAC</b>  | Forward | AGTAACACTCGCTTCGGAATAG     |
|                | Reverse | TGGTTTTAGGGTCTGAGGTAC      |
| <b>h-VDAC</b>  | Forward | CAACTCCAGCCTGATAGGTTTA     |
|                | Reverse | TGCTTGAAATTCCAGTCTAGA      |
| <b>m-ANT-1</b> | Forward | AAAGGCATCATTGATTGTGTCG     |
|                | Reverse | GTA CT TGTCTTTGAAGGCGAA    |
| <b>h-ANT-1</b> | Forward | GGATCATTGATTGTGTGGTGAG     |
|                | Reverse | CCTAAGAAGAGCTGCTTGTACT     |
| <b>m-OTC</b>   | Forward | GTGGGAAGCCAGTCCAAAGT       |
|                | Reverse | TCTGGAGCACAGGTGAGTAGT      |



|                                |         |                       |
|--------------------------------|---------|-----------------------|
| <b>h-OTC</b>                   | Forward | TGAAAGTCTCACGGACACGG  |
|                                | Reverse | AATGTCCAGTCAGAGGCAGC  |
| <b>m-TR<math>\alpha</math></b> | Forward | TGAGCACTACGTCAACCACC  |
|                                | Reverse | TGCCCCCTTGTACAGAATCG  |
| <b>h-TR<math>\alpha</math></b> | Forward | CCAAGCTGCTGATGAAGGGT  |
|                                | Reverse | CTTGGAGACTTCCCGCTTCAC |
| <b>m-TR<math>\beta</math></b>  | Forward | GCGCTCTGATCCGTGTTTTTC |
|                                | Reverse | AGGCAGGCTTCAGACATTCC  |
| <b>h-TR<math>\beta</math></b>  | Forward | AGGGCACTGGTAATTTGGCT  |
|                                | Reverse | TGGCTTTGTCACCACACACT  |

**Supporting Table S2. All differential expressed genes in mGPDH over-expressed LO2 cells.**

**Up-regulated:**

| No. | Track_id             | Gene_Name     | Locus                     | log2(fold_change) | Fold_Change |
|-----|----------------------|---------------|---------------------------|-------------------|-------------|
| 1   | ENSG00000143878.9_1  | RHOB          | chr2:20646835-20649206    | 6.420935657       | 85.682915   |
| 2   | ENSG00000126945.8_2  | HNRNPH2       | chrX:100663283-100669121  | 6.091912309       | 68.210045   |
| 3   | ENSG00000155876.5_2  | RRAGA         | chr9:19049393-19050981    | 6.084787791       | 67.874031   |
| 4   | ENSG00000124942.13_2 | AHNAK         | chr11:62201014-62323707   | 5.435343158       | 43.27143792 |
| 5   | ENSG00000145337.4_2  | PYURF         | chr4:89442136-89444964    | 5.288005632       | 39.07044093 |
| 6   | ENSG00000171223.5_1  | JUNB          | chr19:12902310-12904129   | 5.127670255       | 34.960896   |
| 7   | ENSG00000184897.5_1  | H1FX          | chr3:129033614-129035120  | 4.512381811       | 22.82245067 |
| 8   | ENSG00000176903.4_1  | PNMA1         | chr14:74178486-74181075   | 4.373624967       | 20.729666   |
| 9   | ENSG00000185745.9_1  | IFIT1         | chr10:91152303-91166243   | 4.19454019        | 18.30975003 |
| 10  | ENSG00000184207.8_1  | PGP           | chr16:2261998-2264808     | 4.05868499        | 16.66425585 |
| 11  | ENSG00000121966.6_1  | CXCR4         | chr2:136871919-136875735  | 3.956884573       | 15.52890903 |
| 12  | ENSG00000180185.11_1 | FAHD1         | chr16:1876942-1890208     | 3.956239784       | 15.52197019 |
| 13  | ENSG00000183978.7_1  | COA3          | chr17:40947165-40950722   | 3.933361709       | 15.27776615 |
| 14  | ENSG00000177733.6_2  | HNRNPA0       | chr5:137081340-137090065  | 3.919611718       | 15.132849   |
| 15  | ENSG00000259956.1_1  | RBM15B        | chr3:51428699-51435339    | 3.640250837       | 12.468801   |
| 16  | ENSG00000141232.4_2  | TOB1          | chr17:48939584-48945339   | 3.635230514       | 12.42548719 |
| 17  | ENSG00000170881.4_2  | RNF139        | chr8:125486979-125500155  | 3.630887314       | 12.3881368  |
| 18  | ENSG00000260027.4_2  | HOXB7         | chr17:46684589-46710934   | 3.602963821       | 12.15066881 |
| 19  | ENSG00000186222.4_2  | BLOC1S4       | chr4:6717782-6719398      | 3.595681599       | 12.089491   |
| 20  | ENSG00000171421.12_2 | MRPL36        | chr5:1798500-1801480      | 3.5608755         | 11.8013132  |
| 21  | ENSG00000119938.8_1  | PPP1R3C       | chr10:93388199-93392811   | 3.528248395       | 11.53741725 |
| 22  | ENSG00000205138.3_1  | SDHAF1        | chr19:36486101-36487217   | 3.508420032       | 11.379932   |
| 23  | ENSG00000255112.2_2  | CHMP1B        | chr18:11851395-11854448   | 3.403014368       | 10.57814219 |
| 24  | ENSG00000137124.7_2  | ALDH1B1       | chr9:38392661-38398658    | 3.293668399       | 9.806024724 |
| 25  | ENSG00000273604.1_1  | C17orf96      | chr17:36827956-36831674   | 3.274532728       | 9.676818    |
| 26  | ENSG00000175283.7_1  | DOLK          | chr9:131707809-131709898  | 3.047016391       | 8.265009    |
| 27  | ENSG00000268861.6_2  | CTD-2207O23.3 | chr19:7447720-7537363     | 2.971646183       | 7.844308    |
| 28  | ENSG00000204899.5_1  | MZT1          | chr13:73282495-73301825   | 2.931321131       | 7.628086116 |
| 29  | ENSG00000168264.10_1 | IRF2BP2       | chr1:234740015-234745271  | 2.914533607       | 7.539838423 |
| 30  | ENSG00000180008.8_1  | SOCS4         | chr14:55493948-55516206   | 2.866268684       | 7.291768118 |
| 31  | ENSG00000171443.6_1  | ZNF524        | chr19:56111388-56114504   | 2.83091331        | 7.115244386 |
| 32  | ENSG00000054598.6_1  | FOXC1         | chr6:1610207-1614132      | 2.82077998        | 7.065442803 |
| 33  | ENSG00000215251.3_2  | FASTKD5       | chr20:3127165-3140543     | 2.761168271       | 6.779450168 |
| 34  | ENSG00000205269.5_1  | TMEM170B      | chr6:11538511-11583757    | 2.740369492       | 6.682414587 |
| 35  | ENSG00000110917.7_1  | MLEC          | chr12:121124672-121139667 | 2.686353546       | 6.436844184 |
| 36  | ENSG00000163960.11_1 | UBXN7         | chr3:196074533-196159345  | 2.663467589       | 6.335539992 |
| 37  | ENSG00000179886.5_1  | TIGD5         | chr8:144680005-144685394  | 2.602436688       | 6.073115    |
| 38  | ENSG00000094916.14_2 | CBX5          | chr12:54624724-54673917   | 2.593361666       | 6.035033028 |
| 39  | ENSG00000179859.8_2  | AC025335.1    | chr17:7816642-7819594     | 2.578885656       | 5.974780266 |
| 40  | ENSG00000104472.9_2  | CHRAC1        | chr8:141521397-141527236  | 2.557274423       | 5.885946474 |
| 41  | ENSG00000143942.4_1  | CHAC2         | chr2:53994929-54002333    | 2.529436946       | 5.773463081 |
| 42  | ENSG00000168461.12_2 | RAB31         | chr18:9708162-9862548     | 2.504447906       | 5.674321547 |
| 43  | ENSG00000245848.2_1  | CEBPA         | chr19:33790840-33793470   | 2.473757564       | 5.554887    |
| 44  | ENSG00000111911.6_1  | HINT3         | chr6:126277927-126301390  | 2.463061803       | 5.513856814 |
| 45  | ENSG00000272414.5_2  | FAM47E-STBD1  | chr4:77172874-77232282    | 2.440426677       | 5.428022411 |

|    |                      |                |                           |             |             |
|----|----------------------|----------------|---------------------------|-------------|-------------|
| 46 | ENSG00000164284.14_1 | GRPEL2         | chr5:148724993-148734146  | 2.439123831 | 5.42312277  |
| 47 | ENSG00000175895.3_1  | PLEKHF2        | chr8:96146032-96168912    | 2.408881495 | 5.310624393 |
| 48 | ENSG00000171314.8_1  | PGAM1          | chr10:99185917-99193198   | 2.39995107  | 5.277852637 |
| 49 | ENSG00000120742.10_1 | SERP1          | chr3:150259781-150321015  | 2.378101651 | 5.198522521 |
| 50 | ENSG00000178074.5_2  | C2orf69        | chr2:200775979-200820658  | 2.35648542  | 5.121212488 |
| 51 | ENSG00000105810.9_1  | CDK6           | chr7:92234235-92465908    | 2.352686668 | 5.10774559  |
| 52 | ENSG00000180398.11_1 | MCFD2          | chr2:47129009-47168994    | 2.352094453 | 5.105649331 |
| 53 | ENSG00000137168.7_1  | PPIL1          | chr6:36822603-36842800    | 2.347606928 | 5.089792805 |
| 54 | ENSG00000166619.12_2 | BLCAP          | chr20:36120874-36156333   | 2.331731126 | 5.034090408 |
| 55 | ENSG00000241360.1_2  | PDXP           | chr22:38054734-38062941   | 2.315759047 | 4.978665356 |
| 56 | ENSG00000188211.8_1  | NCR3LG1        | chr11:17373273-17398888   | 2.280804379 | 4.859488205 |
| 57 | ENSG00000185115.5_2  | NSMCE3         | chr15:29557196-29562033   | 2.273128235 | 4.833701    |
| 58 | ENSG00000179833.4_1  | SERTAD2        | chr2:64858755-64978139    | 2.22584226  | 4.677839166 |
| 59 | ENSG00000120137.6_2  | PANK3          | chr5:167975500-168006605  | 2.225564471 | 4.676938542 |
| 60 | ENSG0000002834.17_2  | LASP1          | chr17:37026112-37078023   | 2.214698812 | 4.641846488 |
| 61 | ENSG00000178449.8_2  | COX14          | chr12:50505762-50514240   | 2.208131575 | 4.620764537 |
| 62 | ENSG00000164983.7_1  | TMEM65         | chr8:125318430-125384933  | 2.19383831  | 4.575211097 |
| 63 | ENSG00000165169.10_1 | DYNLT3         | chrX:37696010-37706890    | 2.171383236 | 4.50455077  |
| 64 | ENSG00000076554.15_2 | TPD52          | chr8:80946980-81143467    | 2.155939392 | 4.456587377 |
| 65 | ENSG00000196821.9_1  | C6orf106       | chr6:34555065-34664636    | 2.143523774 | 4.418399209 |
| 66 | ENSG00000168282.5_1  | MGAT2          | chr14:50087513-50090199   | 2.130547418 | 4.378836    |
| 67 | ENSG00000160888.6_1  | IER2           | chr19:13261229-13265722   | 2.095097303 | 4.272549786 |
| 68 | ENSG00000168040.4_1  | FADD           | chr11:70049269-70053496   | 2.068683483 | 4.19503685  |
| 69 | ENSG00000177946.5_1  | CENPBD1        | chr16:90036199-90038942   | 2.068537024 | 4.194611    |
| 70 | ENSG00000198681.6_2  | MAGEA1         | chrX:152481520-152486115  | 2.054732084 | 4.154664798 |
| 71 | ENSG00000213463.4_2  | SYNJ2BP        | chr14:70833213-70883778   | 2.0506675   | 4.142976108 |
| 72 | ENSG00000243927.5_2  | MRPS6          | chr21:35445524-35515334   | 2.035176507 | 4.098728722 |
| 73 | ENSG00000244509.3_1  | APOBEC3C       | chr22:39410088-39416357   | 2.020943814 | 4.058492124 |
| 74 | ENSG00000119396.10_2 | RAB14          | chr9:123940415-123985292  | 2.020185871 | 4.05636049  |
| 75 | ENSG00000176125.4_1  | UFSP1          | chr7:100486344-100487339  | 2.016645716 | 4.046419    |
| 76 | ENSG00000237190.3_1  | CDKN2AIPNL     | chr5:133737778-133747589  | 2.008342851 | 4.023198306 |
| 77 | ENSG00000176018.12_1 | LYSMD3         | chr5:89811428-89825401    | 2.004363989 | 4.012117864 |
| 78 | ENSG00000152642.10_2 | GPD1L          | chr3:32147181-32210205    | 1.986473571 | 3.96267204  |
| 79 | ENSG00000184785.5_1  | SMIM10         | chrX:134124968-134126503  | 1.962648592 | 3.897769    |
| 80 | ENSG00000270757.1_2  | HSPE1-MOB4     | chr2:198365137-198415450  | 1.953924143 | 3.874269041 |
| 81 | ENSG00000215012.8_2  | C22orf29       | chr22:19833661-19842419   | 1.946359682 | 3.854008309 |
| 82 | ENSG00000184675.9_1  | AMER1          | chrX:63404997-63425624    | 1.938848575 | 3.833995318 |
| 83 | ENSG00000153989.7_1  | NUS1           | chr6:117996665-118031803  | 1.935304117 | 3.824587401 |
| 84 | ENSG00000185432.11_1 | METTL7A        | chr12:51317255-51326300   | 1.926860631 | 3.802269075 |
| 85 | ENSG00000158825.5_1  | CDA            | chr1:20915441-20945401    | 1.926800143 | 3.802109661 |
| 86 | ENSG00000106080.10_1 | FKBP14         | chr7:30050203-30066300    | 1.920311797 | 3.785048528 |
| 87 | ENSG00000181744.8_1  | C3orf58        | chr3:143690640-143767561  | 1.915556338 | 3.772592667 |
| 88 | ENSG00000259040.5_2  | BLOC1S5-TXNDC5 | chr6:7881755-8064597      | 1.909430854 | 3.756608714 |
| 89 | ENSG00000115963.13_1 | RND3           | chr2:151324709-151395525  | 1.899657159 | 3.731245169 |
| 90 | ENSG00000150991.14_2 | UBC            | chr12:125396150-125401914 | 1.899343172 | 3.730433194 |
| 91 | ENSG00000148175.12_1 | STOM           | chr9:124101266-124132582  | 1.886733141 | 3.697969027 |
| 92 | ENSG00000006831.9_1  | ADIPOR2        | chr12:1797740-1897844     | 1.876150904 | 3.670943485 |
| 93 | ENSG00000213214.4_1  | ARHGEF35       | chr7:143883176-143892748  | 1.85367315  | 3.614192    |
| 94 | ENSG00000169813.16_2 | HNRNPF         | chr10:43881065-43904614   | 1.853197598 | 3.61300086  |

|     |                      |                |                           |             |             |
|-----|----------------------|----------------|---------------------------|-------------|-------------|
| 95  | ENSG00000127423.10_1 | AUNIP          | chr1:26158404-26185949    | 1.840364894 | 3.581005897 |
| 96  | ENSG00000185262.8_1  | UBALD2         | chr17:74261283-74267380   | 1.835852547 | 3.569823009 |
| 97  | ENSG00000182512.4_1  | GLRX5          | chr14:95999840-96011061   | 1.831401642 | 3.558826602 |
| 98  | ENSG00000185875.12_1 | THNSL1         | chr10:25305587-25315593   | 1.829722368 | 3.554686596 |
| 99  | ENSG00000188997.7_2  | KCTD21         | chr11:77882295-77899868   | 1.82093243  | 3.533094727 |
| 100 | ENSG00000139146.13_2 | FAM60A         | chr12:31433518-31479992   | 1.76875503  | 3.407597721 |
| 101 | ENSG00000113369.8_1  | ARRDC3         | chr5:90664541-90679176    | 1.76468643  | 3.398001359 |
| 102 | ENSG00000117000.8_1  | RLF            | chr1:40627045-40706593    | 1.7512431   | 3.366485148 |
| 103 | ENSG00000131873.5_1  | CHSY1          | chr15:101715928-101792137 | 1.749259244 | 3.361859061 |
| 104 | ENSG00000139921.12_1 | TMX1           | chr14:51706880-51724264   | 1.743127943 | 3.347601833 |
| 105 | ENSG00000196636.7_1  | SDHAF3         | chr7:96745902-96811075    | 1.740982121 | 3.342626411 |
| 106 | ENSG00000113638.13_2 | TTC33          | chr5:40512435-40756077    | 1.735941091 | 3.330967068 |
| 107 | ENSG00000179195.15_2 | ZNF664         | chr12:124456392-124499986 | 1.733042908 | 3.324282314 |
| 108 | ENSG00000100528.11_1 | CNIH1          | chr14:54890278-54908149   | 1.727630775 | 3.311834948 |
| 109 | ENSG00000116191.17_2 | RALGPS2        | chr1:178694282-178890976  | 1.711329204 | 3.274623867 |
| 110 | ENSG00000165410.14_1 | CFL2           | chr14:35175975-35184029   | 1.707006885 | 3.264827764 |
| 111 | ENSG00000145780.7_1  | FEM1C          | chr5:114856605-114880591  | 1.703794293 | 3.257565738 |
| 112 | ENSG00000147853.16_2 | AK3            | chr9:4709559-4742043      | 1.69010046  | 3.226791723 |
| 113 | ENSG00000106636.7_2  | YKT6           | chr7:44240567-44253893    | 1.684640215 | 3.214602194 |
| 114 | ENSG00000112335.14_1 | SNX3           | chr6:108532426-108582464  | 1.680767541 | 3.205984702 |
| 115 | ENSG00000152683.14_2 | SLC30A6        | chr2:32390910-32449448    | 1.67346481  | 3.189797436 |
| 116 | ENSG00000110104.11_1 | CCDC86         | chr11:60609544-60618554   | 1.672929465 | 3.188614008 |
| 117 | ENSG00000082497.11_1 | SERTAD4        | chr1:210406144-210419976  | 1.672730702 | 3.188174736 |
| 118 | ENSG00000100410.7_1  | PHF5A          | chr22:41855721-41864729   | 1.669883331 | 3.181888608 |
| 119 | ENSG00000115520.8_1  | COQ10B         | chr2:198318147-198340032  | 1.669577115 | 3.181213316 |
| 120 | ENSG00000205213.13_1 | LGR4           | chr11:27387508-27494322   | 1.643786009 | 3.124847986 |
| 121 | ENSG00000113719.15_2 | ERGIC1         | chr5:172261278-172379688  | 1.635577979 | 3.107120039 |
| 122 | ENSG00000106537.7_1  | TSPAN13        | chr7:16793160-16824161    | 1.633459971 | 3.102561851 |
| 123 | ENSG00000081087.14_2 | OSTM1          | chr6:108362613-108487058  | 1.631608306 | 3.098582339 |
| 124 | ENSG00000196743.8_2  | GM2A           | chr5:150591711-150650001  | 1.631077724 | 3.097442979 |
| 125 | ENSG00000175606.10_2 | TMEM70         | chr8:74884672-74895018    | 1.617526285 | 3.068484477 |
| 126 | ENSG00000171862.9_2  | PTEN           | chr10:89622870-89731687   | 1.615913927 | 3.06505705  |
| 127 | ENSG00000100418.7_1  | DESI1          | chr22:41994032-42017100   | 1.613829357 | 3.060631504 |
| 128 | ENSG00000186480.12_2 | INSIG1         | chr7:155089486-155101945  | 1.606819736 | 3.045796885 |
| 129 | ENSG00000175215.10_2 | CTDSP2         | chr12:58213710-58240522   | 1.605144012 | 3.042261174 |
| 130 | ENSG00000108825.17_2 | PTGES3L-AARSD1 | chr17:41102543-41132545   | 1.605092581 | 3.042152722 |
| 131 | ENSG00000204315.3_1  | FKBPL          | chr6:32096484-32098068    | 1.604179395 | 3.040227732 |
| 132 | ENSG00000165175.15_1 | MID1IP1        | chrX:38660685-38665790    | 1.603244781 | 3.038258835 |
| 133 | ENSG00000158604.14_2 | TMED4          | chr7:44617493-44621886    | 1.600498921 | 3.032481662 |
| 134 | ENSG00000120075.5_2  | HOXB5          | chr17:46668619-46671323   | 1.584439293 | 2.998912217 |
| 135 | ENSG00000123836.14_1 | PFKFB2         | chr1:207207711-207254369  | 1.576953982 | 2.983392889 |
| 136 | ENSG00000172007.5_1  | RAB33B         | chr4:140374386-140397763  | 1.576906077 | 2.983293827 |
| 137 | ENSG00000142751.14_1 | GPN2           | chr1:27202624-27216788    | 1.576883501 | 2.983247144 |
| 138 | ENSG00000114933.15_2 | INO80D         | chr2:206858445-206951027  | 1.575849144 | 2.981109037 |
| 139 | ENSG00000134533.6_2  | RERG           | chr12:15260717-15501609   | 1.565517471 | 2.959836473 |
| 140 | ENSG00000129480.12_2 | DTD2           | chr14:31915242-31926716   | 1.558274548 | 2.945014114 |
| 141 | ENSG00000132912.12_1 | DCTN4          | chr5:150088002-150138671  | 1.54839115  | 2.924907804 |
| 142 | ENSG00000158769.17_2 | F11R           | chr1:160965001-160991138  | 1.54598755  | 2.920038823 |
| 143 | ENSG00000275993.2_1  | CH507-42P11.8  | chr21:44834402-44847008   | 1.53406064  | 2.895998068 |

|     |                      |            |                           |             |             |
|-----|----------------------|------------|---------------------------|-------------|-------------|
| 144 | ENSG00000124164.15_1 | VAPB       | chr20:56964178-57026157   | 1.532672314 | 2.893212548 |
| 145 | ENSG00000129055.12_1 | ANAPC13    | chr3:134196548-134205558  | 1.526520196 | 2.880901223 |
| 146 | ENSG00000129128.12_1 | SPCS3      | chr4:177241115-177253396  | 1.52132257  | 2.870540817 |
| 147 | ENSG00000162433.14_2 | AK4        | chr1:65613232-65697828    | 1.514809248 | 2.857610424 |
| 148 | ENSG00000112078.13_1 | KCTD20     | chr6:36410544-36458920    | 1.502205603 | 2.832754552 |
| 149 | ENSG00000164188.8_2  | RANBP3L    | chr5:36248536-36302216    | 1.498911474 | 2.826293856 |
| 150 | ENSG00000155959.10_1 | VBPI       | chrX:154425284-154468098  | 1.494670947 | 2.817998702 |
| 151 | ENSG00000109062.10_2 | SLC9A3R1   | chr17:72744752-72765492   | 1.49327432  | 2.815272006 |
| 152 | ENSG00000236104.2_2  | ZBTB22     | chr6:33282183-33285719    | 1.492567496 | 2.813893051 |
| 153 | ENSG00000006625.17_2 | GGCT       | chr7:30536237-30544460    | 1.488451922 | 2.805877301 |
| 154 | ENSG00000137492.7_2  | THAP12     | chr11:76061000-76092015   | 1.482673692 | 2.794661777 |
| 155 | ENSG00000147536.11_1 | GINS4      | chr8:41386725-41402565    | 1.458525013 | 2.748272412 |
| 156 | ENSG00000143401.14_2 | ANP32E     | chr1:150190717-150208504  | 1.452840847 | 2.737465622 |
| 157 | ENSG00000213064.9_1  | SFT2D2     | chr1:168195176-168222263  | 1.450875702 | 2.733739364 |
| 158 | ENSG00000177721.4_2  | ANXA2R     | chr5:43039183-43043272    | 1.446873693 | 2.726166531 |
| 159 | ENSG00000131446.16_2 | MGAT1      | chr5:180211782-180242652  | 1.446651176 | 2.725746087 |
| 160 | ENSG00000206075.13_2 | SERPINB5   | chr18:61143994-61172318   | 1.437439401 | 2.708397328 |
| 161 | ENSG00000122140.10_1 | MRPS2      | chr9:138391830-138396519  | 1.437116242 | 2.707790724 |
| 162 | ENSG00000106799.12_1 | TGFBR1     | chr9:101866320-101916474  | 1.436085305 | 2.705856452 |
| 163 | ENSG00000160113.5_2  | NR2F6      | chr19:17342692-17356749   | 1.434390326 | 2.702679288 |
| 164 | ENSG00000152104.11_2 | PTPN14     | chr1:214522039-214725792  | 1.424507696 | 2.684228885 |
| 165 | ENSG00000120948.15_2 | TARDBP     | chr1:11072401-11086477    | 1.423206107 | 2.681808286 |
| 166 | ENSG00000104442.9_1  | ARMC1      | chr8:66514691-66546452    | 1.421203071 | 2.67808745  |
| 167 | ENSG00000165434.7_1  | PGM2L1     | chr11:74041363-74109518   | 1.406179835 | 2.650344384 |
| 168 | ENSG00000102931.7_2  | ARL2BP     | chr16:57279010-57287547   | 1.393997266 | 2.628058274 |
| 169 | ENSG00000158470.5_1  | B4GALT5    | chr20:48249482-48330415   | 1.393995561 | 2.628055168 |
| 170 | ENSG00000171475.13_1 | WIPF2      | chr17:38375556-38440388   | 1.388062258 | 2.617269087 |
| 171 | ENSG00000180773.14_2 | SLC36A4    | chr11:92877337-92931130   | 1.384431398 | 2.610690433 |
| 172 | ENSG00000160209.18_1 | PDXK       | chr21:45138975-45182188   | 1.382992765 | 2.608088391 |
| 173 | ENSG00000085719.12_2 | CPNE3      | chr8:87526656-87573726    | 1.379635354 | 2.602025957 |
| 174 | ENSG00000170145.4_1  | SIK2       | chr11:111473115-111601577 | 1.37786695  | 2.59883844  |
| 175 | ENSG00000111331.12_1 | OAS3       | chr12:113376157-113411054 | 1.377583016 | 2.598327018 |
| 176 | ENSG00000105855.9_1  | ITGB8      | chr7:20370325-20455377    | 1.373047206 | 2.590170749 |
| 177 | ENSG00000110042.7_1  | DTX4       | chr11:58938903-58976060   | 1.372194369 | 2.588640043 |
| 178 | ENSG00000268533.1_2  | AC004076.7 | chr19:57905551-57949825   | 1.355227612 | 2.558374761 |
| 179 | ENSG00000052802.12_2 | MSMO1      | chr4:166248775-166264312  | 1.352653635 | 2.55381432  |
| 180 | ENSG00000143190.21_2 | POUF1      | chr1:167190066-167396582  | 1.349885073 | 2.548918197 |
| 181 | ENSG00000112210.11_1 | RAB23      | chr6:57051790-57087112    | 1.348118501 | 2.545798971 |
| 182 | ENSG00000177853.14_2 | ZNF518A    | chr10:97889472-97965044   | 1.337211178 | 2.526624337 |
| 183 | ENSG00000166130.14_1 | IKBIP      | chr12:99007183-99038891   | 1.334274556 | 2.521486595 |
| 184 | ENSG00000162512.15_2 | SDC3       | chr1:31342314-31381608    | 1.3341299   | 2.521233785 |
| 185 | ENSG00000003989.16_2 | SLC7A2     | chr8:17354597-17428082    | 1.327910935 | 2.510388998 |
| 186 | ENSG00000101447.13_1 | FAM83D     | chr20:37554955-37581749   | 1.326177269 | 2.507374111 |
| 187 | ENSG00000115884.10_1 | SDC1       | chr2:20400558-20425194    | 1.325325773 | 2.505894666 |
| 188 | ENSG00000147533.16_1 | GOLGA7     | chr8:41347915-41368499    | 1.324207782 | 2.50393532  |
| 189 | ENSG00000135956.8_1  | TMEM127    | chr2:96914254-96931732    | 1.321569497 | 2.499378675 |
| 190 | ENSG00000204389.9_2  | HSPA1A     | chr6:31783241-31785723    | 1.320398597 | 2.497350987 |
| 191 | ENSG00000133393.12_1 | FOPNL      | chr16:15959577-15982482   | 1.31950318  | 2.495801472 |
| 192 | ENSG00000078401.6_1  | EDN1       | chr6:12290596-12297427    | 1.315960498 | 2.489680301 |

|     |                      |              |                           |             |             |
|-----|----------------------|--------------|---------------------------|-------------|-------------|
| 193 | ENSG00000166881.9_2  | NEMP1        | chr12:57449426-57481846   | 1.30999824  | 2.479412375 |
| 194 | ENSG00000111843.13_1 | TMEM14C      | chr6:10723148-10731362    | 1.308748504 | 2.477265511 |
| 195 | ENSG00000185551.13_2 | NR2F2        | chr15:96869167-96883492   | 1.303536573 | 2.468332201 |
| 196 | ENSG00000099795.6_1  | NDUFB7       | chr19:14676890-14682874   | 1.300171759 | 2.462581991 |
| 197 | ENSG00000198961.9_1  | PJA2         | chr5:108670410-108745695  | 1.297487643 | 2.458004647 |
| 198 | ENSG00000198252.11_1 | STYX         | chr14:53196898-53241716   | 1.293978825 | 2.45203373  |
| 199 | ENSG00000155621.14_1 | C9orf85      | chr9:74526426-74600970    | 1.289745065 | 2.444848494 |
| 200 | ENSG00000282936.1_1  | CTC-281F24.5 | chr17:6540100-6543636     | 1.288496771 | 2.442734    |
| 201 | ENSG00000102780.16_2 | DGKH         | chr13:42614172-42830714   | 1.287501911 | 2.441050111 |
| 202 | ENSG00000122873.11_1 | CISD1        | chr10:60028818-60049346   | 1.287210028 | 2.440556291 |
| 203 | ENSG00000118985.15_1 | ELL2         | chr5:95220802-95297775    | 1.280791435 | 2.429722302 |
| 204 | ENSG00000120709.10_1 | FAM53C       | chr5:137667624-137685418  | 1.273016724 | 2.416663702 |
| 205 | ENSG00000108829.9_2  | LRRC59       | chr17:48452420-48474914   | 1.272350837 | 2.415548528 |
| 206 | ENSG00000173598.13_2 | NUDT4        | chr12:93771659-93801922   | 1.270132949 | 2.411837903 |
| 207 | ENSG00000187325.4_1  | TAF9B        | chrX:77385245-77395203    | 1.2694224   | 2.410650329 |
| 208 | ENSG00000198663.16_2 | C6orf89      | chr6:36839646-36896740    | 1.26413344  | 2.401828998 |
| 209 | ENSG00000133678.13_2 | TMEM254      | chr10:81838402-81852313   | 1.258149579 | 2.391887572 |
| 210 | ENSG00000168564.5_1  | CDKN2AIP     | chr4:184365744-184369351  | 1.256756135 | 2.389578455 |
| 211 | ENSG00000127334.10_2 | DYRK2        | chr12:68042118-68059186   | 1.254771883 | 2.386294138 |
| 212 | ENSG00000153944.10_2 | MSI2         | chr17:55333212-55762046   | 1.251386976 | 2.380701886 |
| 213 | ENSG00000184209.14_2 | SNRNP35      | chr12:123942188-123957701 | 1.250974343 | 2.380021065 |
| 214 | ENSG00000152492.13_1 | CCDC50       | chr3:191046866-191116459  | 1.250712445 | 2.379589051 |
| 215 | ENSG00000084652.15_1 | TXLNA        | chr1:32645287-32663886    | 1.250411354 | 2.379092481 |
| 216 | ENSG00000141026.5_1  | MED9         | chr17:17380300-17396540   | 1.248539086 | 2.376006999 |
| 217 | ENSG00000008086.11_2 | CDKL5        | chrX:18443703-18671749    | 1.248320008 | 2.375646222 |
| 218 | ENSG00000117697.14_1 | NSL1         | chr1:212899495-212965124  | 1.242740139 | 2.36647575  |
| 219 | ENSG00000132356.11_1 | PRKAA1       | chr5:40759481-40798476    | 1.233242089 | 2.350947121 |
| 220 | ENSG00000092847.11_2 | AGO1         | chr1:36335409-36396129    | 1.232333242 | 2.349466573 |
| 221 | ENSG00000109519.12_1 | GREP1        | chr4:7060633-7069924      | 1.230228702 | 2.346041773 |
| 222 | ENSG00000150779.11_1 | TIMM8B       | chr11:111955524-111957522 | 1.230001547 | 2.345672414 |
| 223 | ENSG00000155858.5_1  | LSM11        | chr5:157170703-157187717  | 1.229752051 | 2.345266794 |
| 224 | ENSG00000008282.8_1  | SYPL1        | chr7:105730949-105753022  | 1.226992467 | 2.340785061 |
| 225 | ENSG00000124783.12_2 | SSR1         | chr6:7268539-7347679      | 1.225868931 | 2.338962823 |
| 226 | ENSG00000058091.16_2 | CDK14        | chr7:90095738-90839905    | 1.2241556   | 2.336186742 |
| 227 | ENSG00000116273.5_1  | PHF13        | chr1:6673745-6684093      | 1.220625072 | 2.330476672 |
| 228 | ENSG00000052723.11_1 | SIKE1        | chr1:115312100-115323306  | 1.217454883 | 2.325361288 |
| 229 | ENSG00000173917.10_1 | HOXB2        | chr17:46618256-46622351   | 1.212364204 | 2.317170502 |
| 230 | ENSG00000173889.15_1 | PHC3         | chr3:169804520-169899537  | 1.208669661 | 2.311244139 |
| 231 | ENSG00000183723.12_2 | CMTM4        | chr16:66648653-66730610   | 1.20264423  | 2.301611334 |
| 232 | ENSG00000121417.13_1 | ZNF211       | chr19:58141763-58154147   | 1.202511984 | 2.301400363 |
| 233 | ENSG00000173744.17_2 | AGFG1        | chr2:228336868-228425930  | 1.197484841 | 2.293394975 |
| 234 | ENSG00000104756.15_1 | KCTD9        | chr8:25285363-25315992    | 1.197135146 | 2.292839146 |
| 235 | ENSG00000132603.13_2 | NIP7         | chr16:69373333-69377014   | 1.193811419 | 2.28756291  |
| 236 | ENSG00000164466.12_2 | SFXN1        | chr5:174904065-174956745  | 1.193490858 | 2.287054679 |
| 237 | ENSG00000108064.10_2 | TFAM         | chr10:60144782-60158981   | 1.191405799 | 2.283751694 |
| 238 | ENSG00000167074.14_1 | TEF          | chr22:41763337-41795330   | 1.190796784 | 2.282787842 |
| 239 | ENSG00000177981.10_2 | ASB8         | chr12:48541571-48574996   | 1.186006569 | 2.275220816 |
| 240 | ENSG00000097033.14_1 | SH3GLB1      | chr1:87170253-87213867    | 1.173057681 | 2.254890977 |
| 241 | ENSG00000140382.14_2 | HMG20A       | chr15:77712754-77777949   | 1.172026952 | 2.253280551 |

|     |                      |              |                           |             |             |
|-----|----------------------|--------------|---------------------------|-------------|-------------|
| 242 | ENSG00000141574.7_2  | SECTM1       | chr17:80278900-80291950   | 1.168991267 | 2.248544236 |
| 243 | ENSG00000273439.1    | ZNF8         | chr19:58790318-58807254   | 1.168125276 | 2.247194932 |
| 244 | ENSG00000186908.14_2 | ZDHHC17      | chr12:77157368-77247476   | 1.167929616 | 2.246890186 |
| 245 | ENSG00000198081.10_2 | ZBTB14       | chr18:5289018-5297052     | 1.166464434 | 2.244609432 |
| 246 | ENSG00000259529.1_2  | RP11-468E2.4 | chr14:24620427-24636611   | 1.159592346 | 2.233942955 |
| 247 | ENSG00000154511.11_1 | FAM69A       | chr1:93298294-93427079    | 1.154319905 | 2.225793737 |
| 248 | ENSG00000165660.7_1  | FAM175B      | chr10:126490354-126525239 | 1.154292885 | 2.225752051 |
| 249 | ENSG00000182318.5_1  | ZSCAN22      | chr19:58838385-58853698   | 1.147617323 | 2.215476959 |
| 250 | ENSG00000096063.15_2 | SRPK1        | chr6:35800743-35889119    | 1.147561207 | 2.215390787 |
| 251 | ENSG00000116205.11_2 | TCEANC2      | chr1:54519260-54578192    | 1.146452397 | 2.213688761 |
| 252 | ENSG00000115159.15_1 | GPD2         | chr2:157291802-157470247  | 1.145537931 | 2.212286038 |
| 253 | ENSG00000104419.14_2 | NDRG1        | chr8:134249414-134314265  | 1.144738157 | 2.211059972 |
| 254 | ENSG00000169570.9_2  | DTWD2        | chr5:118173017-118324240  | 1.14365445  | 2.209399717 |
| 255 | ENSG00000235878.4    | AP001468.1   | chr21:47612391-47613673   | 1.140445624 | 2.204491056 |
| 256 | ENSG0000005073.5_1   | HOXA11       | chr7:27221129-27224842    | 1.140249073 | 2.20419074  |
| 257 | ENSG00000125954.12_2 | CHURC1-FNTB  | chr14:65381203-65528521   | 1.139159213 | 2.20252625  |
| 258 | ENSG00000070444.14_1 | MNT          | chr17:2287354-2304412     | 1.136132711 | 2.197910608 |
| 259 | ENSG00000196247.11_2 | ZNF107       | chr7:64126461-64171960    | 1.129974351 | 2.188548492 |
| 260 | ENSG00000198856.12_1 | OSTC         | chr4:109571740-109588976  | 1.129870451 | 2.188390883 |
| 261 | ENSG00000213593.9_2  | TMX2         | chr11:57480072-57508445   | 1.128686716 | 2.18659604  |
| 262 | ENSG00000167130.17_2 | DOLPP1       | chr9:131843379-131852717  | 1.128395795 | 2.186155155 |
| 263 | ENSG00000164011.17_1 | ZNF691       | chr1:43312244-43318148    | 1.127540393 | 2.184859325 |
| 264 | ENSG00000135913.10_1 | USP37        | chr2:219314974-219433084  | 1.127375447 | 2.184609541 |
| 265 | ENSG00000084112.14_2 | SSH1         | chr12:109171968-109251366 | 1.126497769 | 2.183280916 |
| 266 | ENSG00000214871.3    | AC005082.1   | chr7:23210760-23234503    | 1.124316709 | 2.179982735 |
| 267 | ENSG00000134321.11_1 | RSAD2        | chr2:7005937-7038370      | 1.122339236 | 2.176996724 |
| 268 | ENSG00000139644.12_2 | TMBIM6       | chr12:50101508-50158717   | 1.116025906 | 2.167490854 |
| 269 | ENSG00000104381.12_1 | GDAP1        | chr8:75233365-75401107    | 1.115932151 | 2.167350002 |
| 270 | ENSG00000179562.2_1  | GCC1         | chr7:127220672-127233665  | 1.115172336 | 2.166208838 |
| 271 | ENSG00000170345.9_2  | FOS          | chr14:75745477-75748933   | 1.113978148 | 2.164416505 |
| 272 | ENSG00000118260.14_2 | CREB1        | chr2:208394461-208468155  | 1.113473341 | 2.163659297 |
| 273 | ENSG00000105085.10_2 | MED26        | chr19:16685718-16739873   | 1.11145308  | 2.160631562 |
| 274 | ENSG00000258315.5_2  | C17orf49     | chr17:6917814-6920844     | 1.110955788 | 2.159886929 |
| 275 | ENSG00000198466.11_2 | ZNF587       | chr19:58361225-58376480   | 1.10968395  | 2.157983673 |
| 276 | ENSG00000148154.9_1  | UGCG         | chr9:114659046-114697649  | 1.107142433 | 2.154185419 |
| 277 | ENSG00000235750.9_1  | KIAA0040     | chr1:175126123-175162135  | 1.105359841 | 2.151525353 |
| 278 | ENSG00000114503.10_2 | NCBP2        | chr3:196662273-196669468  | 1.103378423 | 2.148572445 |
| 279 | ENSG00000130332.14_2 | LSM7         | chr19:2321516-2328619     | 1.103060595 | 2.148099165 |
| 280 | ENSG00000204568.11_1 | MRPS18B      | chr6:30585486-30594172    | 1.099103967 | 2.142216018 |
| 281 | ENSG00000251201.8_2  | TMED7-TICAM2 | chr5:114914339-114961858  | 1.097939256 | 2.140487271 |
| 282 | ENSG00000135069.13_1 | PSAT1        | chr9:80912059-80945009    | 1.097675208 | 2.140095546 |
| 283 | ENSG00000132109.9_1  | TRIM21       | chr11:4406127-4414926     | 1.097028807 | 2.139136888 |
| 284 | ENSG00000168275.14_1 | COA6         | chr1:234509202-234519795  | 1.094498552 | 2.135388474 |
| 285 | ENSG00000101928.12_1 | MOSPD1       | chrX:134021656-134049297  | 1.094460314 | 2.135331878 |
| 286 | ENSG00000158406.4_1  | HIST1H4H     | chr6:26277837-26285866    | 1.092759152 | 2.132815473 |
| 287 | ENSG00000124839.12_1 | RAB17        | chr2:238482965-238510257  | 1.092305463 | 2.132144865 |
| 288 | ENSG00000103966.10_2 | EHD4         | chr15:42188137-42264776   | 1.091199634 | 2.130511198 |
| 289 | ENSG00000143363.15_2 | PRUNE1       | chr1:150980896-151008189  | 1.089539835 | 2.128061486 |
| 290 | ENSG00000164764.10_2 | SBSPON       | chr8:73976775-74036323    | 1.087982924 | 2.125766187 |

|     |                      |               |                           |             |             |
|-----|----------------------|---------------|---------------------------|-------------|-------------|
| 291 | ENSG00000165879.8_1  | FRAT1         | chr10:99079024-99081672   | 1.083278054 | 2.118845    |
| 292 | ENSG00000067082.14_1 | KLF6          | chr10:3818188-3827473     | 1.081568161 | 2.116335216 |
| 293 | ENSG00000168438.14_1 | CDC40         | chr6:110501344-110575478  | 1.081447082 | 2.11615761  |
| 294 | ENSG00000163041.9_1  | H3F3A         | chr1:226249552-226259702  | 1.076780535 | 2.109323736 |
| 295 | ENSG00000115310.17_2 | RTN4          | chr2:55199323-55339757    | 1.075463096 | 2.107398425 |
| 296 | ENSG00000119048.7_2  | UBE2B         | chr5:133706870-133727683  | 1.074815052 | 2.106452015 |
| 297 | ENSG00000179454.13_1 | KLHL28        | chr14:45393522-45511525   | 1.073032106 | 2.103850377 |
| 298 | ENSG00000215193.12_2 | PEX26         | chr22:18560686-18613905   | 1.072896443 | 2.103652552 |
| 299 | ENSG00000182551.13_1 | ADII          | chr2:3501132-3523507      | 1.072859451 | 2.103598613 |
| 300 | ENSG00000270276.2_1  | HIST2H4B      | chr1:149825607-149832776  | 1.071765597 | 2.102004266 |
| 301 | ENSG00000175073.7_1  | VCPIP1        | chr8:67540722-67579452    | 1.066914044 | 2.094947434 |
| 302 | ENSG00000134247.9_1  | PTGFRN        | chr1:117452679-117532980  | 1.065835895 | 2.09338243  |
| 303 | ENSG00000108582.11_1 | CPD           | chr17:28705923-28797007   | 1.064696226 | 2.091729398 |
| 304 | ENSG00000142166.12_2 | IFNAR1        | chr21:34696782-34732168   | 1.062211513 | 2.088129973 |
| 305 | ENSG00000148672.8_1  | GLUD1         | chr10:88810243-88854623   | 1.059101345 | 2.083633221 |
| 306 | ENSG00000142892.14_2 | PIGK          | chr1:77554675-77685115    | 1.05881911  | 2.08322564  |
| 307 | ENSG00000145332.13_1 | KLHL8         | chr4:88081255-88161466    | 1.058192465 | 2.082320972 |
| 308 | ENSG00000163788.13_1 | SNRK          | chr3:43328004-43466256    | 1.057975773 | 2.082008232 |
| 309 | ENSG00000169239.12_2 | CA5B          | chrX:15706953-15806532    | 1.057271147 | 2.080991608 |
| 310 | ENSG00000141378.14_1 | PTRH2         | chr17:57751997-57784987   | 1.056171624 | 2.079406223 |
| 311 | ENSG00000212747.4_1  | FAM127C       | chrX:134154534-134156559  | 1.055476112 | 2.078404    |
| 312 | ENSG00000101413.11_1 | RPRD1B        | chr20:36661948-36756182   | 1.050086253 | 2.070653641 |
| 313 | ENSG00000171861.10_2 | MRM3          | chr17:685513-695749       | 1.047238828 | 2.066570853 |
| 314 | ENSG00000124201.14_1 | ZNFY1         | chr20:47854483-47894963   | 1.045202937 | 2.063656623 |
| 315 | ENSG00000079950.13_1 | STX7          | chr6:132767006-132834337  | 1.042542118 | 2.059854048 |
| 316 | ENSG00000256206.2_2  | RP11-140L24.4 | chr11:14515329-14541890   | 1.042478616 | 2.059763383 |
| 317 | ENSG00000219607.3_1  | PPP1R3G       | chr6:5084815-5089721      | 1.040415544 | 2.05682     |
| 318 | ENSG00000163069.12_1 | SGCB          | chr4:52886872-52904648    | 1.023556923 | 2.032924904 |
| 319 | ENSG00000168569.7_2  | TMEM223       | chr11:62539101-62559493   | 1.021603454 | 2.030174102 |
| 320 | ENSG00000184208.10_1 | C22orf46      | chr22:42084943-42094140   | 1.019137431 | 2.026706855 |
| 321 | ENSG00000167112.9_2  | TRUB2         | chr9:131067440-131085021  | 1.017430662 | 2.024310594 |
| 322 | ENSG00000106688.11_1 | SLC1A1        | chr9:4490444-4587469      | 1.017115743 | 2.023868764 |
| 323 | ENSG00000126775.8_2  | ATG14         | chr14:55833110-55878576   | 1.016158799 | 2.022526771 |
| 324 | ENSG00000168769.13_2 | TET2          | chr4:106067032-106200973  | 1.014695042 | 2.020475758 |
| 325 | ENSG00000145623.12_2 | OSMR          | chr5:38845960-38945698    | 1.009804381 | 2.013638047 |
| 326 | ENSG00000101945.16_1 | SUV39H1       | chrX:48553945-48567403    | 1.008840275 | 2.012292848 |
| 327 | ENSG00000149016.15_2 | TUT1          | chr11:62342517-62359649   | 1.007766799 | 2.010796104 |
| 328 | ENSG00000158042.8_1  | MRPL17        | chr11:6702013-6704632     | 1.004446231 | 2.006173293 |
| 329 | ENSG00000131115.15_1 | ZNF227        | chr19:44711700-44741421   | 1.001175201 | 2.001629838 |
| 330 | ENSG00000114450.9_2  | GNB4          | chr3:179113877-179169378  | 1.001147717 | 2.001591707 |
| 331 | ENSG00000204175.5_1  | GPRIN2        | chr10:46994087-47000573   | 0.999892023 | 1.999850318 |
| 332 | ENSG00000100266.18_2 | PACSIN2       | chr22:43231418-43411151   | 0.996100707 | 1.994601731 |
| 333 | ENSG00000168917.8_1  | SLC35G2       | chr3:136537489-136574734  | 0.994486894 | 1.992371797 |
| 334 | ENSG00000138376.10_2 | BARB1         | chr2:215590370-215674435  | 0.993113325 | 1.990475791 |
| 335 | ENSG00000125449.6_1  | ARMC7         | chr17:73106047-73126360   | 0.990723247 | 1.987180948 |
| 336 | ENSG00000150051.13_2 | MKX           | chr10:27961804-28034989   | 0.990700854 | 1.987150104 |
| 337 | ENSG00000185736.15_2 | ADARB2        | chr10:1223258-1779670     | 0.990165389 | 1.986412697 |
| 338 | ENSG00000154114.12_2 | TBCEL         | chr11:120894781-120961484 | 0.99013108  | 1.986365459 |
| 339 | ENSG00000125629.14_1 | INSIG2        | chr2:118846028-118868573  | 0.981716189 | 1.974813194 |



|     |                            |          |                           |             |             |
|-----|----------------------------|----------|---------------------------|-------------|-------------|
| 340 | ENSG00000152952.11_1       | PLOD2    | chr3:145787227-145881440  | 0.978419194 | 1.970305301 |
| 341 | ENSG00000151743.10_2       | AMN1     | chr12:31824071-31882108   | 0.975353798 | 1.966123299 |
| 342 | ENSG0000005020.12_2        | SKAP2    | chr7:26706681-27034858    | 0.967602272 | 1.955587749 |
| 343 | ENSG00000147548.16_2       | WHSC1L1  | chr8:38127215-38239790    | 0.965286167 | 1.952450763 |
| 344 | ENSG00000230567.3          | FAM203B  | chr8:145437880-145440835  | 0.964649783 | 1.951589712 |
| 345 | ENSG00000169981.10_2       | ZNF35    | chr3:44690219-44702283    | 0.964382337 | 1.951227961 |
| 346 | ENSG00000111775.2_2        | COX6A1   | chr12:120875893-120878545 | 0.963505061 | 1.950041816 |
| 347 | ENSG00000203811.1_1        | HIST2H3C | chr1:149811110-149812765  | 0.961300306 | 1.947064    |
| 348 | ENSG00000171159.4_1        | C9orf16  | chr9:130922539-130926207  | 0.961291716 | 1.947052407 |
| 349 | ENSG00000124466.8_1        | LYPD3    | chr19:43964939-43969812   | 0.959854574 | 1.945113815 |
| 350 | ENSG00000131069.19_2       | ACSS2    | chr20:33459949-33515765   | 0.95981122  | 1.945055363 |
| 351 | ENSG00000172840.6_2        | PDP2     | chr16:66912492-66929657   | 0.959242762 | 1.944289113 |
| 352 | ENSG00000134108.12_1       | ARL8B    | chr3:5163905-5222597      | 0.957390505 | 1.941794469 |
| 353 | ENSG00000173852.14_2       | DPY19L1  | chr7:34968488-35077883    | 0.957170532 | 1.941498419 |
| 354 | ENSG00000183542.5_2        | KLRC4    | chr12:10559981-10562356   | 0.956561534 | 1.940679036 |
| 355 | ENSG00000178878.12_2       | APOLD1   | chr12:12878851-12982909   | 0.955511456 | 1.939267009 |
| 356 | ENSG00000099219.13_1       | ERMP1    | chr9:5765076-5833117      | 0.954221918 | 1.937534391 |
| 357 | ENSG00000163738.18_2       | MTHFD2L  | chr4:74979891-75168816    | 0.951053741 | 1.933284209 |
| 358 | ENSG00000173011.11_2       | TADA2B   | chr4:7043626-7059679      | 0.949141804 | 1.930723813 |
| 359 | ENSG00000135373.12_1       | EHF      | chr11:34642640-34682604   | 0.948463926 | 1.929816839 |
| 360 | ENSG00000169519.20_2       | METTL15  | chr11:28129795-28548588   | 0.948091667 | 1.929318952 |
| 361 | ENSG00000101782.14_2       | RIOK3    | chr18:21032787-21066567   | 0.947654123 | 1.928733912 |
| 362 | ENSG00000241127.7_2        | YAE1D1   | chr7:39605975-39649919    | 0.946720171 | 1.927485718 |
| 363 | ENSG00000169100.13_1_PAR_Y | SLC25A6  | chrY:1455045-1461617      | 0.946636501 | 1.927373936 |
| 364 | ENSG00000253368.3_1        | TRNP1    | chr1:27320198-27327389    | 0.946425769 | 1.927092429 |
| 365 | ENSG00000012963.14_2       | UBR7     | chr14:93673401-93695561   | 0.944009545 | 1.923867638 |
| 366 | ENSG00000215712.10_2       | TMEM242  | chr6:157710418-157744633  | 0.941486572 | 1.920506134 |
| 367 | ENSG00000241258.6_2        | CRCP     | chr7:65579591-65619555    | 0.941263744 | 1.92020953  |
| 368 | ENSG00000178252.17_2       | WDR6     | chr3:49044495-49053386    | 0.940881594 | 1.91970096  |
| 369 | ENSG00000146007.10_2       | ZMAT2    | chr5:140078265-140086261  | 0.938933271 | 1.917110203 |
| 370 | ENSG00000115540.14_2       | MOB4     | chr2:198380295-198418423  | 0.933701214 | 1.91017023  |
| 371 | ENSG00000076248.10_1       | UNG      | chr12:109535379-109548797 | 0.933285155 | 1.909619436 |
| 372 | ENSG00000101557.14_2       | USP14    | chr18:158383-214629       | 0.929918659 | 1.905168577 |
| 373 | ENSG00000066583.11_1       | ISOC1    | chr5:128430444-128449721  | 0.929359035 | 1.904429702 |
| 374 | ENSG00000233608.3_1        | TWIST2   | chr2:239756673-239832239  | 0.928388098 | 1.903148448 |
| 375 | ENSG00000143590.13_2       | EFNA3    | chr1:155051348-155060014  | 0.926422049 | 1.900556678 |
| 376 | ENSG00000119640.8_1        | ACYPI    | chr14:75519924-75536186   | 0.92450716  | 1.898035742 |
| 377 | ENSG00000175602.3_1        | CCDC85B  | chr11:65657583-65659106   | 0.923949336 | 1.897302    |
| 378 | ENSG00000175893.11_1       | ZDHHC21  | chr9:14611069-14693469    | 0.923904167 | 1.897242599 |
| 379 | ENSG00000171970.12_2       | ZNF57    | chr19:2900896-2918474     | 0.923496154 | 1.896706111 |
| 380 | ENSG00000105722.9_2        | ERF      | chr19:42751724-42759309   | 0.922950959 | 1.895989479 |
| 381 | ENSG00000196154.11_2       | S100A4   | chr1:153516089-153522612  | 0.921540676 | 1.894136992 |
| 382 | ENSG00000198146.4_2        | ZNF770   | chr15:35270542-35280488   | 0.918863463 | 1.890625296 |
| 383 | ENSG00000169991.10_2       | IFFO2    | chr1:19230775-19283180    | 0.917073414 | 1.888280925 |
| 384 | ENSG00000121060.15_2       | TRIM25   | chr17:54965270-54991399   | 0.914487639 | 1.884899547 |
| 385 | ENSG00000175305.17_2       | CCNE2    | chr8:95891998-95908906    | 0.913440872 | 1.883532428 |
| 386 | ENSG00000137449.15_1       | CPEB2    | chr4:15004298-15071777    | 0.909990137 | 1.879032652 |
| 387 | ENSG00000198040.10_2       | ZNF84    | chr12:133613878-133639890 | 0.90602442  | 1.873874612 |
| 388 | ENSG00000161888.11_2       | SPC24    | chr19:11242196-11266484   | 0.905035945 | 1.87259115  |

|     |                      |                |                           |             |             |
|-----|----------------------|----------------|---------------------------|-------------|-------------|
| 389 | ENSG00000176095.11_1 | IP6K1          | chr3:49761727-49823975    | 0.905000097 | 1.872544621 |
| 390 | ENSG00000144736.13_1 | SHQ1           | chr3:72798428-72911065    | 0.904710433 | 1.872168689 |
| 391 | ENSG00000197355.10_1 | UAP1L1         | chr9:139971953-139978991  | 0.904620166 | 1.872051555 |
| 392 | ENSG00000203618.5_2  | GP1BB          | chr22:19710468-19712294   | 0.904181172 | 1.871482    |
| 393 | ENSG00000145040.3_2  | UCN2           | chr3:48599160-48601206    | 0.902441781 | 1.869227    |
| 394 | ENSG00000166166.12_1 | TRMT61A        | chr14:103995521-104003410 | 0.902281292 | 1.869019074 |
| 395 | ENSG00000185947.14_2 | ZNF267         | chr16:31885079-31928678   | 0.900493136 | 1.866703943 |
| 396 | ENSG00000173848.18_1 | NET1           | chr10:5454514-5500426     | 0.900060863 | 1.866144708 |
| 397 | ENSG00000143443.9_1  | C1orf56        | chr1:151020216-151024462  | 0.899956188 | 1.866009315 |
| 398 | ENSG00000196793.13_1 | ZNF239         | chr10:44051792-44070066   | 0.899870244 | 1.865898156 |
| 399 | ENSG00000164715.5_1  | LMTK2          | chr7:97736197-97838945    | 0.89661201  | 1.861688901 |
| 400 | ENSG00000157181.15_2 | C1orf27        | chr1:186344970-186390510  | 0.889447368 | 1.852466391 |
| 401 | ENSG00000203852.3_1  | HIST2H3A       | chr1:149824181-149825836  | 0.888942315 | 1.851818    |
| 402 | ENSG00000129355.6_1  | CDKN2D         | chr19:10677138-10679735   | 0.888504889 | 1.851256612 |
| 403 | ENSG00000117479.12_2 | SLC19A2        | chr1:169433147-169455241  | 0.887648296 | 1.850157765 |
| 404 | ENSG00000177683.13_2 | THAP5          | chr7:108194987-108210194  | 0.886652994 | 1.848881798 |
| 405 | ENSG00000150782.11_1 | IL18           | chr11:112013974-112034840 | 0.886417535 | 1.84858007  |
| 406 | ENSG00000140265.12_1 | ZSCAN29        | chr15:43650370-43663223   | 0.885998688 | 1.848043465 |
| 407 | ENSG00000182208.12_1 | MOB2           | chr11:1490687-1522477     | 0.884127785 | 1.845648454 |
| 408 | ENSG00000047644.18_2 | WWC3           | chrX:9983602-10112518     | 0.882172555 | 1.84314881  |
| 409 | ENSG00000173451.6_2  | THAP2          | chr12:72056789-72074419   | 0.881492469 | 1.842280156 |
| 410 | ENSG00000068366.19_2 | ACSL4          | chrX:108867473-108976632  | 0.880471056 | 1.840976303 |
| 411 | ENSG00000163257.10_1 | DCAF16         | chr4:17802278-17812381    | 0.879436831 | 1.839657034 |
| 412 | ENSG00000243335.8_2  | KCTD7          | chr7:66093868-66276174    | 0.87696749  | 1.83651094  |
| 413 | ENSG00000001167.14_1 | NFYA           | chr6:41040684-41067715    | 0.87632281  | 1.835690464 |
| 414 | ENSG00000033100.15_2 | CHPF2          | chr7:150929575-150935913  | 0.876110455 | 1.835420283 |
| 415 | ENSG00000154127.9_1  | UBASH3B        | chr11:122526383-122685181 | 0.871439567 | 1.829487511 |
| 416 | ENSG00000239305.6_2  | RNF103         | chr2:86830516-86850989    | 0.868530022 | 1.825801623 |
| 417 | ENSG00000135900.3_1  | MRPL44         | chr2:224822121-224832431  | 0.866632615 | 1.823401939 |
| 418 | ENSG00000187607.15_2 | ZNF286A        | chr17:15602891-15624101   | 0.866328949 | 1.82301818  |
| 419 | ENSG00000278845.4_1  | MRPL45         | chr17:36452989-36479101   | 0.865858012 | 1.822423192 |
| 420 | ENSG00000105514.7_2  | RAB3D          | chr19:11432722-11456946   | 0.865697928 | 1.822220984 |
| 421 | ENSG00000065923.9_2  | SLC9A7         | chrX:46458687-46618607    | 0.863778479 | 1.819798203 |
| 422 | ENSG00000142867.12_1 | BCL10          | chr1:85731931-85742773    | 0.863547913 | 1.819507393 |
| 423 | ENSG00000180834.7_2  | MAP6D1         | chr3:183533664-183543382  | 0.858619175 | 1.813301942 |
| 424 | ENSG00000135316.17_2 | SYNCRIP        | chr6:86317503-86353510    | 0.857847831 | 1.812332709 |
| 425 | ENSG00000204822.6_2  | MRPL53         | chr2:74699085-74700449    | 0.855419269 | 1.809284484 |
| 426 | ENSG00000136867.10_1 | SLC31A2        | chr9:115913222-115926417  | 0.855209557 | 1.809021504 |
| 427 | ENSG00000008083.13_1 | JARID2         | chr6:15246527-15522271    | 0.8540683   | 1.807591026 |
| 428 | ENSG00000196459.13_1 | TRAPPC2        | chrX:13730363-13752754    | 0.852633929 | 1.805794758 |
| 429 | ENSG00000144746.6_1  | ARL6IP5        | chr3:69134095-69155217    | 0.847773154 | 1.799720854 |
| 430 | ENSG00000164176.12_2 | EDIL3          | chr5:83236373-83680611    | 0.847167304 | 1.798965232 |
| 431 | ENSG00000257529.5_2  | RPL36A-HNRNPH2 | chrX:100645999-100667285  | 0.844351754 | 1.795457812 |
| 432 | ENSG00000257923.9_2  | CUX1           | chr7:101459184-101927249  | 0.844009651 | 1.795032109 |
| 433 | ENSG00000165406.15_1 | MARCH8         | chr10:45950033-46090354   | 0.843879578 | 1.794870278 |
| 434 | ENSG00000169032.9_1  | MAP2K1         | chr15:66679155-66784650   | 0.842284313 | 1.79288669  |
| 435 | ENSG00000163291.14_1 | PAQR3          | chr4:79808281-79860592    | 0.842278372 | 1.792879307 |
| 436 | ENSG00000168528.11_1 | SERINC2        | chr1:31882412-31907527    | 0.842112097 | 1.792672684 |
| 437 | ENSG00000268313.1    | AC119673.1     | chr1:205682497-205684153  | 0.839159032 | 1.789007    |

|     |                      |               |                           |             |             |
|-----|----------------------|---------------|---------------------------|-------------|-------------|
| 438 | ENSG00000258643.5_2  | BCL2L2-PABPN1 | chr14:23776044-23794578   | 0.837594734 | 1.787068251 |
| 439 | ENSG00000115183.13_2 | TANC1         | chr2:159825146-160089170  | 0.836509943 | 1.785725023 |
| 440 | ENSG00000167394.12_1 | ZNF668        | chr16:31072164-31085641   | 0.834667286 | 1.783445694 |
| 441 | ENSG00000104998.3_1  | IL27RA        | chr19:14142560-14164028   | 0.833988787 | 1.782607137 |
| 442 | ENSG00000164663.14_2 | USP49         | chr6:41757634-41863099    | 0.832564648 | 1.780848326 |
| 443 | ENSG00000171004.17_2 | HS6ST2        | chrX:131760044-132095423  | 0.831754107 | 1.779848084 |
| 444 | ENSG00000147862.10   | NFIB          | chr9:14081842-14398982    | 0.830361245 | 1.778130544 |
| 445 | ENSG00000104549.11_1 | SQLE          | chr8:126010739-126034525  | 0.830272444 | 1.778021099 |
| 446 | ENSG00000143727.15_1 | ACPI          | chr2:264140-278283        | 0.830037939 | 1.777732112 |
| 447 | ENSG00000137413.15_1 | TAF8          | chr6:42018251-42055199    | 0.830003986 | 1.777690274 |
| 448 | ENSG00000146674.14_2 | IGFBP3        | chr7:45951844-45961473    | 0.827995998 | 1.77521775  |
| 449 | ENSG00000134278.15_2 | SPIRE1        | chr18:12446511-12658133   | 0.82781799  | 1.774998728 |
| 450 | ENSG00000198265.11_2 | HELZ          | chr17:65066554-65242105   | 0.824067458 | 1.770390308 |
| 451 | ENSG00000160051.11_1 | IQCC          | chr1:32671262-32674288    | 0.823426548 | 1.769603995 |
| 452 | ENSG00000100320.22_2 | RBFOX2        | chr22:36134783-36424473   | 0.819835834 | 1.765205117 |
| 453 | ENSG00000080603.16_2 | SRCAP         | chr16:30709530-30752730   | 0.819681212 | 1.76501594  |
| 454 | ENSG00000108671.9_2  | PSMD11        | chr17:30771279-30810336   | 0.815963363 | 1.760473319 |
| 455 | ENSG00000053372.4_1  | MRTO4         | chr1:19578033-19586622    | 0.815256839 | 1.759611382 |
| 456 | ENSG00000163814.7_1  | CDCP1         | chr3:45123770-45187914    | 0.814677296 | 1.758904673 |
| 457 | ENSG00000179304.16_2 | FAM156B       | chrX:52920336-52937587    | 0.814497686 | 1.75868571  |
| 458 | ENSG00000141526.15_2 | SLC16A3       | chr17:80186273-80219005   | 0.813796341 | 1.757830959 |
| 459 | ENSG00000160446.18_1 | ZDHHC12       | chr9:131483148-131486406  | 0.809743398 | 1.752899639 |
| 460 | ENSG00000135341.17_1 | MAP3K7        | chr6:91223292-91296764    | 0.80872879  | 1.751667306 |
| 461 | ENSG00000106615.9_1  | RHEB          | chr7:151163098-151217206  | 0.806462886 | 1.748918288 |
| 462 | ENSG00000107789.15_1 | MINPP1        | chr10:89264632-89313217   | 0.804658295 | 1.746732026 |
| 463 | ENSG00000138685.12_2 | FGF2          | chr4:123747863-123819391  | 0.802636358 | 1.744285696 |
| 464 | ENSG00000109332.19_2 | UBE2D3        | chr4:103715540-103790053  | 0.800649302 | 1.741884907 |
| 465 | ENSG00000126804.13_2 | ZBTB1         | chr14:64970430-65000408   | 0.798840148 | 1.739701934 |
| 466 | ENSG00000107036.11_1 | RIC1          | chr9:5629025-5776557      | 0.797127957 | 1.73763848  |
| 467 | ENSG00000163026.11_2 | WDCP          | chr2:24252210-24272445    | 0.79634049  | 1.736690283 |
| 468 | ENSG00000123395.14_1 | ATG101        | chr12:52463030-52471278   | 0.796176983 | 1.736493467 |
| 469 | ENSG00000170631.14_2 | ZNF16         | chr8:146155744-146176274  | 0.795390481 | 1.735547055 |
| 470 | ENSG00000147459.17_1 | DOCK5         | chr8:25042238-25275598    | 0.792197123 | 1.731709727 |
| 471 | ENSG00000150768.15_1 | DLAT          | chr11:111895538-111935114 | 0.787438671 | 1.726007425 |
| 472 | ENSG00000177463.15_2 | NR2C2         | chr3:14989091-15095107    | 0.786494496 | 1.724878205 |
| 473 | ENSG00000246705.4_2  | H2AFJ         | chr12:14927317-14930936   | 0.786241847 | 1.724576167 |
| 474 | ENSG00000160870.12_2 | CYP3A7        | chr7:99302660-99332819    | 0.783077591 | 1.720797807 |
| 475 | ENSG00000158290.16_1 | CUL4B         | chrX:119658464-119709649  | 0.78025731  | 1.717437157 |
| 476 | ENSG00000101132.9_1  | PFDN4         | chr20:52824386-52844591   | 0.780061338 | 1.71720388  |
| 477 | ENSG00000141759.14_1 | TXNL4A        | chr18:77730811-77793949   | 0.779728292 | 1.71680751  |
| 478 | ENSG00000205339.9_1  | IPO7          | chr11:9406169-9469673     | 0.779296023 | 1.716293187 |
| 479 | ENSG0000027258.4_1   | PCGF2         | chr17:36890150-36906070   | 0.777607757 | 1.714285926 |
| 480 | ENSG00000137710.14_2 | RDX           | chr11:110045605-110167447 | 0.776047199 | 1.712432592 |
| 481 | ENSG00000173641.17_2 | HSPB7         | chr1:16340523-16346089    | 0.774598278 | 1.710713633 |
| 482 | ENSG00000161981.10_1 | SNRNP25       | chr16:103010-107669       | 0.773385092 | 1.70927567  |
| 483 | ENSG00000225828.1_2  | FAM229A       | chr1:32826871-32829879    | 0.771017867 | 1.706473329 |
| 484 | ENSG00000205643.10_1 | CDPF1         | chr22:46639908-46646576   | 0.769286564 | 1.704426708 |
| 485 | ENSG00000054965.10_1 | FAM168A       | chr11:73111532-73309234   | 0.769021571 | 1.704113669 |
| 486 | ENSG00000143933.16_2 | CALM2         | chr2:47387221-47403740    | 0.768448313 | 1.703436671 |

|     |                      |              |                          |             |             |
|-----|----------------------|--------------|--------------------------|-------------|-------------|
| 487 | ENSG00000188015.9_2  | S100A3       | chr1:153519805-153521848 | 0.767909962 | 1.702801141 |
| 488 | ENSG00000105976.14_2 | MET          | chr7:116312444-116438440 | 0.767674168 | 1.702522858 |
| 489 | ENSG00000131931.8_1  | THAP1        | chr8:42691817-42698468   | 0.765619277 | 1.70009961  |
| 490 | ENSG00000136146.14_2 | MED4         | chr13:48627459-48669267  | 0.764015774 | 1.69821106  |
| 491 | ENSG00000162430.16_2 | SEPN1        | chr1:26126667-26144715   | 0.761183865 | 1.694880861 |
| 492 | ENSG00000196139.13_2 | AKR1C3       | chr10:5077546-5149878    | 0.761139245 | 1.694828442 |
| 493 | ENSG00000113312.10_1 | TTC1         | chr5:159436120-159492550 | 0.761065008 | 1.694741233 |
| 494 | ENSG00000108239.8_1  | TBC1D12      | chr10:96162261-96295687  | 0.760287178 | 1.693827759 |
| 495 | ENSG00000168118.11_2 | RAB4A        | chr1:229406809-229441641 | 0.758968848 | 1.692280651 |
| 496 | ENSG00000144744.16_1 | UBA3         | chr3:69103881-69129559   | 0.758802668 | 1.692085734 |
| 497 | ENSG00000178177.15_2 | LCORL        | chr4:17842822-18023499   | 0.758291223 | 1.691485984 |
| 498 | ENSG00000213585.10_1 | VDAC1        | chr5:133307606-133340824 | 0.756383226 | 1.689250434 |
| 499 | ENSG00000085662.13_1 | AKR1B1       | chr7:134127102-134144036 | 0.756311343 | 1.689166268 |
| 500 | ENSG00000036054.12_1 | TBC1D23      | chr3:99979844-100044095  | 0.754384022 | 1.686911189 |
| 501 | ENSG00000133997.11_2 | MED6         | chr14:71047974-71067407  | 0.752770517 | 1.685025609 |
| 502 | ENSG00000204116.11_2 | CHIC1        | chrX:72783036-72906937   | 0.74896535  | 1.680587141 |
| 503 | ENSG00000130312.6_1  | MRPL34       | chr19:17403418-17417652  | 0.747456116 | 1.678829961 |
| 504 | ENSG00000152433.14_2 | ZNF547       | chr19:57874845-57890933  | 0.744169859 | 1.675010175 |
| 505 | ENSG00000177842.11_1 | ZNF620       | chr3:40547483-40560227   | 0.741881935 | 1.672355935 |
| 506 | ENSG00000147421.17_2 | HMBOX1       | chr8:28747911-28922281   | 0.741248957 | 1.671622355 |
| 507 | ENSG00000181192.11_2 | DHTKD1       | chr10:12110971-12165224  | 0.739647553 | 1.669767868 |
| 508 | ENSG00000187134.13_2 | AKR1C1       | chr10:5005445-5025475    | 0.735294507 | 1.664737268 |
| 509 | ENSG00000134440.11_2 | NARS         | chr18:55267888-55289445  | 0.735287851 | 1.664729588 |
| 510 | ENSG00000275778.1_2  | PRH1-PRR4    | chr12:10998448-11324197  | 0.731668172 | 1.660558066 |
| 511 | ENSG00000109189.12_1 | USP46        | chr4:53457138-53525502   | 0.730001656 | 1.658640996 |
| 512 | ENSG00000229117.8_1  | RPL41        | chr12:56510370-56511727  | 0.7288848   | 1.657357463 |
| 513 | ENSG00000125945.14_1 | ZNF436       | chr1:23685941-23695935   | 0.725176103 | 1.65310241  |
| 514 | ENSG00000157823.16_2 | AP3S2        | chr15:90373831-90437870  | 0.719816703 | 1.64697277  |
| 515 | ENSG00000263155.5_2  | MYZAP        | chr15:57884139-57977562  | 0.719363681 | 1.646455684 |
| 516 | ENSG00000272674.3_2  | PCDHB16      | chr5:140560980-140565974 | 0.719301743 | 1.646385    |
| 517 | ENSG00000133731.9_1  | IMPA1        | chr8:82570196-82598928   | 0.719079748 | 1.646131681 |
| 518 | ENSG00000143847.15_1 | PPFIA4       | chr1:202995626-203047868 | 0.719020312 | 1.646063866 |
| 519 | ENSG00000154370.14_2 | TRIM11       | chr1:228581374-228594541 | 0.718328704 | 1.645274954 |
| 520 | ENSG00000100483.13_1 | VCPKMT       | chr14:50575350-50583318  | 0.717207092 | 1.643996345 |
| 521 | ENSG00000115657.12_2 | ABCB6        | chr2:220074490-220083712 | 0.71689824  | 1.643644437 |
| 522 | ENSG00000181029.8_2  | TRAPPC5      | chr19:7745729-7752589    | 0.714723556 | 1.641168712 |
| 523 | ENSG00000131467.10_1 | PSME3        | chr17:40976402-40995775  | 0.714222965 | 1.640599353 |
| 524 | ENSG00000123562.16_2 | MORF4L2      | chrX:102930424-102943086 | 0.713129868 | 1.63935678  |
| 525 | ENSG00000141560.14_1 | FN3KRP       | chr17:80674559-80688204  | 0.711693219 | 1.637725106 |
| 526 | ENSG00000147124.12_1 | ZNF41        | chrX:47305278-47342345   | 0.709532128 | 1.635273705 |
| 527 | ENSG00000164073.9_1  | MFSD8        | chr4:128838960-128887150 | 0.709525005 | 1.635265632 |
| 528 | ENSG00000152620.12_1 | NADK2        | chr5:36192694-36242381   | 0.708941239 | 1.634604079 |
| 529 | ENSG00000248109.2_2  | CTC-295J13.3 | chr5:147601213-147623143 | 0.707196153 | 1.632628054 |
| 530 | ENSG00000177076.5_1  | ACER2        | chr9:19409057-19452018   | 0.706764392 | 1.632139524 |
| 531 | ENSG00000198862.13_2 | LTN1         | chr21:30300466-30365277  | 0.70668224  | 1.632046587 |
| 532 | ENSG00000125901.5_1  | MRPS26       | chr20:3026591-3028900    | 0.70634604  | 1.631666306 |
| 533 | ENSG00000121774.17_1 | KHDRBS1      | chr1:32479430-32526451   | 0.706281299 | 1.631593086 |
| 534 | ENSG00000151690.14_2 | MFSD6        | chr2:191273081-191373931 | 0.705009981 | 1.630155942 |
| 535 | ENSG00000105656.12_2 | ELL          | chr19:18553473-18632937  | 0.704172303 | 1.629209693 |

|     |                      |               |                           |             |             |
|-----|----------------------|---------------|---------------------------|-------------|-------------|
| 536 | ENSG00000251537.4_2  | RP11-385D13.1 | chr17:15474805-15554967   | 0.704153208 | 1.629188129 |
| 537 | ENSG00000213185.6_2  | FAM24B        | chr10:124608594-124639157 | 0.703829916 | 1.628823088 |
| 538 | ENSG00000143033.17_1 | MTF2          | chr1:93544792-93604638    | 0.702798701 | 1.627659247 |
| 539 | ENSG00000268885.1    | AC026740.1    | chr5:667759-6688839       | 0.700761806 | 1.625362828 |
| 540 | ENSG00000280789.1_2  | PAGR1         | chr16:29827273-29831438   | 0.700251097 | 1.624787558 |
| 541 | ENSG00000119820.10_2 | YIPF4         | chr2:32502979-32541663    | 0.699564295 | 1.624014254 |
| 542 | ENSG00000143153.12_1 | ATP1B1        | chr1:169074935-169101960  | 0.699306736 | 1.62372435  |
| 543 | ENSG00000134882.15_2 | UBAC2         | chr13:99853028-100038688  | 0.69794742  | 1.622195189 |
| 544 | ENSG00000100211.10_1 | CBY1          | chr22:39052641-39069859   | 0.69498934  | 1.618872471 |
| 545 | ENSG00000146243.13_1 | IRAK1BP1      | chr6:79577189-79656157    | 0.694559675 | 1.618390409 |
| 546 | ENSG00000173457.10_2 | PPP1R14B      | chr11:64011952-64014413   | 0.694271454 | 1.61806712  |
| 547 | ENSG00000196422.10_1 | PPP1R26       | chr9:138370925-138380739  | 0.693957792 | 1.617715368 |
| 548 | ENSG00000169689.14_2 | STRA13        | chr17:79976578-79981983   | 0.692949029 | 1.616584623 |
| 549 | ENSG00000136514.2_1  | RTP4          | chr3:187086120-187089864  | 0.690261058 | 1.613575471 |
| 550 | ENSG00000074356.16_1 | NCBP3         | chr17:3705459-3749545     | 0.6897381   | 1.612990678 |
| 551 | ENSG00000186130.4_1  | ZBTB6         | chr9:125670335-125675609  | 0.68959362  | 1.61282915  |
| 552 | ENSG00000185658.13_2 | BRWD1         | chr21:40556102-40693485   | 0.688725967 | 1.611859469 |
| 553 | ENSG00000280987.3_2  | MATR3         | chr5:138609441-138667366  | 0.688149801 | 1.611215873 |
| 554 | ENSG00000198908.11_1 | BHLHB9        | chrX:101975616-102008468  | 0.685717537 | 1.608501785 |
| 555 | ENSG00000116815.15_2 | CD58          | chr1:117057157-117113661  | 0.685321494 | 1.608060287 |
| 556 | ENSG00000143507.17_1 | DUSP10        | chr1:221874766-221915518  | 0.684509605 | 1.60715559  |
| 557 | ENSG00000198160.14_1 | MIER1         | chr1:67390578-67454302    | 0.684422305 | 1.607058342 |
| 558 | ENSG00000185728.16_2 | YTHDF3        | chr8:64081112-64125344    | 0.682644388 | 1.60507909  |
| 559 | ENSG00000167118.10_1 | URM1          | chr9:131133598-131154295  | 0.68258665  | 1.605014855 |
| 560 | ENSG00000116984.12_2 | MTR           | chr1:236958581-237067281  | 0.68172642  | 1.604058125 |
| 561 | ENSG00000198315.10_1 | ZKSCAN8       | chr6:28109688-28127250    | 0.681649016 | 1.603972065 |
| 562 | ENSG00000198930.12_1 | CSAG1         | chrX:151903228-151909518  | 0.680103989 | 1.602255241 |
| 563 | ENSG00000105887.10_2 | MTPN          | chr7:135611509-135662101  | 0.679961248 | 1.602096721 |
| 564 | ENSG00000119231.10_2 | SENP5         | chr3:196594727-196661585  | 0.67963969  | 1.601739674 |
| 565 | ENSG00000163428.3_1  | LRRC58        | chr3:120043356-120068186  | 0.678739039 | 1.600740046 |
| 566 | ENSG00000154328.15_1 | NEIL2         | chr8:11627148-11644855    | 0.678241932 | 1.600188577 |
| 567 | ENSG00000198743.6_2  | SLC5A3        | chr21:35445870-35478561   | 0.678147051 | 1.600083342 |
| 568 | ENSG00000111700.12_2 | SLCO1B3       | chr12:20963636-21069845   | 0.677561351 | 1.599433877 |
| 569 | ENSG00000187626.8_1  | ZKSCAN4       | chr6:28212401-28220002    | 0.677346095 | 1.599195253 |
| 570 | ENSG00000156642.16_1 | NPTN          | chr15:73852355-73926475   | 0.676521673 | 1.598281661 |
| 571 | ENSG00000136152.14_1 | COG3          | chr13:46039033-46110765   | 0.674892707 | 1.596478038 |
| 572 | ENSG00000272962.1    | SLC5A3        | chr21:35445870-35478561   | 0.673334748 | 1.59475494  |
| 573 | ENSG00000183840.6_2  | GPR39         | chr2:133174147-133404132  | 0.672615377 | 1.593959946 |
| 574 | ENSG00000146477.5_1  | SLC22A3       | chr6:160769300-160873613  | 0.672273424 | 1.593582185 |
| 575 | ENSG00000205060.10_1 | SLC35B4       | chr7:133974084-134001803  | 0.671480606 | 1.592706689 |
| 576 | ENSG00000119328.11_1 | FAM206A       | chr9:111696461-111713024  | 0.670216615 | 1.591311879 |
| 577 | ENSG00000180758.11_2 | GPR157        | chr1:9160364-9189229      | 0.669308138 | 1.590310132 |
| 578 | ENSG00000168077.13_1 | SCARA3        | chr8:27491385-27534293    | 0.667648847 | 1.588482115 |
| 579 | ENSG00000081386.12_1 | ZNF510        | chr9:99518147-99540411    | 0.66617137  | 1.586856169 |
| 580 | ENSG00000147642.16_2 | SYBU          | chr8:110586207-110704020  | 0.665185176 | 1.585771801 |
| 581 | ENSG00000115073.7_1  | ACTR1B        | chr2:98272426-98280570    | 0.66404809  | 1.584522439 |
| 582 | ENSG00000180318.3_1  | ALX1          | chr12:85673885-85695562   | 0.663372479 | 1.583780584 |
| 583 | ENSG00000163344.5_1  | PMVK          | chr1:154897210-154909467  | 0.663180178 | 1.583569492 |
| 584 | ENSG00000173535.13_1 | TNFRSF10C     | chr8:22941868-22974950    | 0.661567632 | 1.581800475 |

|     |                      |             |                           |             |             |
|-----|----------------------|-------------|---------------------------|-------------|-------------|
| 585 | ENSG00000129003.15_2 | VPS13C      | chr15:62144588-62352672   | 0.658769986 | 1.57873605  |
| 586 | ENSG00000159921.14_1 | GENE        | chr9:36214438-36277053    | 0.656994384 | 1.57679421  |
| 587 | ENSG00000118200.14_2 | CAMSAP2     | chr1:200708686-200829832  | 0.654704701 | 1.574293685 |
| 588 | ENSG00000196648.6    | GOLGA6L9    | chr15:83098710-83108085   | 0.65436826  | 1.573926597 |
| 589 | ENSG00000115419.12_2 | GLS         | chr2:191745553-191830278  | 0.653659503 | 1.57315356  |
| 590 | ENSG00000197063.10_2 | MAFG        | chr17:79876146-79885590   | 0.652673628 | 1.572078902 |
| 591 | ENSG00000135919.12_2 | SERPINE2    | chr2:224839829-224904036  | 0.651355044 | 1.570642721 |
| 592 | ENSG00000122884.12_1 | P4HA1       | chr10:74766975-74856732   | 0.650261997 | 1.569453186 |
| 593 | ENSG00000155324.9_2  | GRAMD3      | chr5:125695824-125832186  | 0.650176391 | 1.569360061 |
| 594 | ENSG00000122481.16_2 | RWDD3       | chr1:95699711-95712781    | 0.649643315 | 1.56878029  |
| 595 | ENSG00000173928.2_1  | SWSAP1      | chr19:11485361-11487627   | 0.649401631 | 1.568517506 |
| 596 | ENSG00000164056.10_1 | SPRY1       | chr4:124317950-124324915  | 0.64923112  | 1.568332135 |
| 597 | ENSG00000153214.9_2  | TMEM87B     | chr2:112812800-112876895  | 0.64778302  | 1.566758717 |
| 598 | ENSG00000118518.15_2 | RNF146      | chr6:127587755-127609712  | 0.647278996 | 1.566211445 |
| 599 | ENSG00000145908.12_1 | ZNF300      | chr5:150273954-150284545  | 0.647059563 | 1.565973244 |
| 600 | ENSG00000154122.12_2 | ANKH        | chr5:14704913-14871887    | 0.646920547 | 1.565822356 |
| 601 | ENSG00000123094.15_2 | RASSF8      | chr12:26111962-26232825   | 0.646828829 | 1.565722814 |
| 602 | ENSG00000170471.14_2 | RALGAPB     | chr20:37101459-37207504   | 0.646600419 | 1.565474946 |
| 603 | ENSG00000134294.13_1 | SLC38A2     | chr12:46751972-46766650   | 0.646104011 | 1.564936383 |
| 604 | ENSG00000130921.7_1  | C12orf65    | chr12:123717463-123742506 | 0.646101865 | 1.564934055 |
| 605 | ENSG00000025156.12_1 | HSF2        | chr6:122720691-122754264  | 0.646042788 | 1.564869974 |
| 606 | ENSG00000143321.18_1 | HDGF        | chr1:156711899-156736717  | 0.645218322 | 1.563975944 |
| 607 | ENSG00000198554.11_2 | WDHD1       | chr14:55405668-55493823   | 0.644886956 | 1.563616762 |
| 608 | ENSG00000159674.11_2 | SPON2       | chr4:1160720-1202750      | 0.643068692 | 1.561647339 |
| 609 | ENSG00000100225.17_1 | FBXO7       | chr22:32870663-32894816   | 0.642473264 | 1.56100295  |
| 610 | ENSG00000131480.8_1  | AOC2        | chr17:40996617-41002724   | 0.64191405  | 1.560397995 |
| 611 | ENSG00000181577.15_1 | C6orf223    | chr6:43968317-43973695    | 0.641663359 | 1.560126875 |
| 612 | ENSG00000081181.7_1  | ARG2        | chr14:68086515-68118437   | 0.640713215 | 1.55909973  |
| 613 | ENSG00000243646.9_2  | IL10RB      | chr21:34638663-34682492   | 0.639077562 | 1.557333105 |
| 614 | ENSG00000065600.12_1 | TMEM206     | chr1:212537273-212588243  | 0.6381106   | 1.556289657 |
| 615 | ENSG00000166266.13_1 | CUL5        | chr11:107879459-107978503 | 0.637767249 | 1.555919315 |
| 616 | ENSG00000173546.7_1  | CSPG4       | chr15:75966663-76005189   | 0.636234511 | 1.554267164 |
| 617 | ENSG00000115128.6_1  | SF3B6       | chr2:24290454-24299313    | 0.636132455 | 1.55415722  |
| 618 | ENSG00000164134.12_1 | NAA15       | chr4:140222609-140341187  | 0.635981151 | 1.553994234 |
| 619 | ENSG00000163125.15_1 | RPRD2       | chr1:150335567-150449042  | 0.635839771 | 1.553841955 |
| 620 | ENSG00000131389.16_1 | SLC6A6      | chr3:14444076-14530857    | 0.633818499 | 1.551666486 |
| 621 | ENSG00000173915.13_2 | USMG5       | chr10:105148798-105156223 | 0.632498854 | 1.550247812 |
| 622 | ENSG00000165730.14_1 | STOX1       | chr10:70587298-70655188   | 0.632353031 | 1.550091127 |
| 623 | ENSG00000114120.11_2 | SLC25A36    | chr3:140660672-140698775  | 0.632202938 | 1.549929869 |
| 624 | ENSG00000244462.7_2  | RBM12       | chr20:34236847-34252878   | 0.631221972 | 1.548876346 |
| 625 | ENSG00000185722.16_2 | ANKFY1      | chr17:4067201-4167272     | 0.630901295 | 1.548532106 |
| 626 | ENSG00000162063.12_2 | CCNF        | chr16:2479395-2508855     | 0.629640953 | 1.547179895 |
| 627 | ENSG00000204186.7_1  | ZDBF2       | chr2:207139387-207179152  | 0.629417014 | 1.546939756 |
| 628 | ENSG00000276418.5_2  | RP11-26J3.4 | chr8:80831095-80993010    | 0.62905924  | 1.546556178 |
| 629 | ENSG00000101974.14_1 | ATP11C      | chrX:138808505-139027435  | 0.628491476 | 1.54594766  |
| 630 | ENSG00000135686.12_1 | KLHL36      | chr16:84682131-84701292   | 0.628365482 | 1.545812655 |
| 631 | ENSG00000257594.3_2  | GALNT4      | chr12:89913185-89918583   | 0.626984646 | 1.54433383  |
| 632 | ENSG00000179152.19_1 | TCAIM       | chr3:44379611-44450943    | 0.626867959 | 1.544208928 |
| 633 | ENSG00000169641.13_2 | LUZP1       | chr1:23410516-23504301    | 0.626488742 | 1.543803081 |

|     |                      |               |                           |             |             |
|-----|----------------------|---------------|---------------------------|-------------|-------------|
| 634 | ENSG00000173726.10_1 | TOMM20        | chr1:235272651-235292251  | 0.62530387  | 1.54253569  |
| 635 | ENSG00000169184.5_1  | MN1           | chr22:28144265-28197486   | 0.62457574  | 1.541757367 |
| 636 | ENSG00000141741.11_1 | MIEN1         | chr17:37884749-37887040   | 0.623753526 | 1.540878946 |
| 637 | ENSG00000112312.9_2  | GMNN          | chr6:24775159-24786327    | 0.621708557 | 1.538696353 |
| 638 | ENSG00000262560.1_2  | RP11-296A16.1 | chr15:44064815-44091331   | 0.621387529 | 1.538354    |
| 639 | ENSG00000112365.4_2  | ZBTB24        | chr6:109783797-109804440  | 0.621287995 | 1.53824787  |
| 640 | ENSG00000111540.15_1 | RAB5B         | chr12:56367697-56390467   | 0.620418722 | 1.537321302 |
| 641 | ENSG00000214113.10_1 | LYRM4         | chr6:5102827-5261172      | 0.619985369 | 1.536859595 |
| 642 | ENSG00000074527.11_1 | NTN4          | chr12:96051583-96184930   | 0.61966286  | 1.536516075 |
| 643 | ENSG00000137075.17_1 | RNF38         | chr9:36336393-36487545    | 0.618624732 | 1.535410833 |
| 644 | ENSG00000166272.16_1 | WBP1L         | chr10:104503727-104576024 | 0.618540072 | 1.535320735 |
| 645 | ENSG00000167508.11_2 | MVD           | chr16:88718343-88729569   | 0.617355661 | 1.534060798 |
| 646 | ENSG00000069482.6_1  | GAL           | chr11:68451247-68458643   | 0.616422    | 1.53306833  |
| 647 | ENSG00000111181.12_1 | SLC6A12       | chr12:299243-323736       | 0.615998082 | 1.532617923 |
| 648 | ENSG00000158435.7_1  | CNOT11        | chr2:101869264-101886778  | 0.615326002 | 1.531904118 |
| 649 | ENSG00000040341.17_2 | STAU2         | chr8:74332604-74659943    | 0.615137678 | 1.531704162 |
| 650 | ENSG00000196730.12_2 | DAPK1         | chr9:90112143-90323548    | 0.612778354 | 1.529201324 |
| 651 | ENSG00000196652.11_1 | ZKSCAN5       | chr7:99102274-99132323    | 0.61265906  | 1.529074881 |
| 652 | ENSG00000130348.11_2 | QRSL1         | chr6:107077453-107116292  | 0.611103835 | 1.527427427 |
| 653 | ENSG00000017797.11_2 | RALBP1        | chr18:9475007-9538114     | 0.610435222 | 1.52671971  |
| 654 | ENSG00000068354.15_2 | TBC1D25       | chrX:48397845-48420997    | 0.609214985 | 1.52542895  |
| 655 | ENSG00000111142.13_2 | METAP2        | chr12:95867296-95909615   | 0.608163583 | 1.524317659 |
| 656 | ENSG00000085721.12_1 | RRN3          | chr16:15153879-15188174   | 0.607914596 | 1.524054607 |
| 657 | ENSG00000139211.6_1  | AMIGO2        | chr12:47469490-47473734   | 0.607182655 | 1.523281585 |
| 658 | ENSG00000181852.17_2 | RNF41         | chr12:56595959-56615717   | 0.60663284  | 1.52270117  |
| 659 | ENSG00000125814.17_1 | NAPB          | chr20:23355156-23402156   | 0.603700052 | 1.519608884 |
| 660 | ENSG00000066557.5_1  | LRRC40        | chr1:70610488-70671303    | 0.60354819  | 1.519448935 |
| 661 | ENSG00000169100.13_1 | SLC25A6       | chrX:1505045-1511617      | 0.602175601 | 1.518004009 |
| 662 | ENSG00000118418.14_1 | HMGN3         | chr6:79910962-79944455    | 0.601844761 | 1.517655939 |
| 663 | ENSG00000172888.11_1 | ZNF621        | chr3:40566369-40616176    | 0.601229198 | 1.51700853  |
| 664 | ENSG00000143870.12_2 | PDIA6         | chr2:10923517-10978103    | 0.600571494 | 1.516317106 |
| 665 | ENSG00000152242.10_2 | C18orf25      | chr18:43753519-43846954   | 0.599873722 | 1.515583902 |
| 666 | ENSG00000110395.6_2  | CBL           | chr11:119076986-119184636 | 0.599189623 | 1.514865411 |
| 667 | ENSG00000136937.12_2 | NCBP1         | chr9:100395908-100436030  | 0.597879224 | 1.513490085 |
| 668 | ENSG00000070540.12_1 | WIPI1         | chr17:66417089-66453654   | 0.597786013 | 1.513392303 |
| 669 | ENSG00000114346.13_1 | ECT2          | chr3:172468472-172539264  | 0.597458881 | 1.51304918  |
| 670 | ENSG00000112419.14_2 | PHACTR2       | chr6:143857982-144152322  | 0.597294461 | 1.512876752 |
| 671 | ENSG00000157693.14_1 | C9orf91       | chr9:117373486-117408702  | 0.596433872 | 1.511974567 |
| 672 | ENSG00000148297.15_2 | MED22         | chr9:136205160-136214986  | 0.595452106 | 1.510946006 |
| 673 | ENSG00000176105.13_2 | YES1          | chr18:721588-812547       | 0.592101435 | 1.507440893 |
| 674 | ENSG00000188243.12_1 | COMMD6        | chr13:76099355-76123575   | 0.59148786  | 1.506799918 |
| 675 | ENSG00000243244.5_2  | STON1         | chr2:48756522-48825652    | 0.590908615 | 1.506195056 |
| 676 | ENSG00000197622.12_1 | CDC42SE1      | chr1:151023447-151042801  | 0.590867859 | 1.506152507 |
| 677 | ENSG00000173041.11_1 | ZNF680        | chr7:63980262-64023484    | 0.590265535 | 1.505523821 |
| 678 | ENSG00000163923.9_2  | RPL39L        | chr3:186838736-186898696  | 0.59022716  | 1.505483775 |
| 679 | ENSG00000173894.10_1 | CBX2          | chr17:77751931-77761782   | 0.590112247 | 1.505363865 |
| 680 | ENSG00000116455.13_2 | WDR77         | chr1:111982512-111991998  | 0.589524723 | 1.504750946 |
| 681 | ENSG00000176386.8_1  | CDC26         | chr9:116018115-116037869  | 0.588881514 | 1.504080219 |
| 682 | ENSG00000095303.14_2 | PTGS1         | chr9:125132809-125157982  | 0.588754195 | 1.503947489 |

|     |                      |        |                         |             |             |
|-----|----------------------|--------|-------------------------|-------------|-------------|
| 683 | ENSG00000116661.9_1  | FBXO2  | chr1:11708424-11715842  | 0.587492671 | 1.502632978 |
| 684 | ENSG00000172159.15_1 | FRMD3  | chr9:85857905-86153461  | 0.585656593 | 1.500721836 |
| 685 | ENSG00000100906.10_1 | NFKBIA | chr14:35870717-35873955 | 0.585540827 | 1.500601418 |

### Down-regulated:

| No. | Track_id             | Gene_Name        | Locus                     | log2(fold_change) | Fold_Change |
|-----|----------------------|------------------|---------------------------|-------------------|-------------|
| 1   | ENSG00000198727.2    | MT-CYB           | chrM:14747-15887          | -10.513634        | 0.000684039 |
| 2   | ENSG00000169564.6_2  | PCBP1            | chr2:70314586-70316335    | -7.260181889      | 0.006523302 |
| 3   | ENSG00000204388.6_2  | HSPA1B           | chr6:31795512-31798032    | -7.021933907      | 0.007694622 |
| 4   | ENSG00000136026.13_2 | CKAP4            | chr12:106631655-106698057 | -4.963434422      | 0.032052164 |
| 5   | ENSG00000277443.2_2  | MARCKS           | chr6:114178541-114184648  | -4.915367713      | 0.033138045 |
| 6   | ENSG00000181218.5_1  | HIST3H2A         | chr1:228644680-228645574  | -4.792656474      | 0.036080009 |
| 7   | ENSG00000189241.6_2  | TSPYL1           | chr6:116597741-116601066  | -4.694541092      | 0.038619115 |
| 8   | ENSG00000270170.1_1  | NCBP2-AS2        | chr3:196669494-196670411  | -4.529595344      | 0.043296813 |
| 9   | ENSG00000124659.6_1  | TBCC             | chr6:42712219-42713834    | -4.273310735      | 0.051713661 |
| 10  | ENSG00000198890.7_2  | PRMT6            | chr1:107599301-107601916  | -4.114363943      | 0.057736844 |
| 11  | ENSG00000176396.10_2 | EID2             | chr19:40029345-40030973   | -4.00557964       | 0.062258747 |
| 12  | ENSG00000170385.9_1  | SLC30A1          | chr1:211744910-211752084  | -3.970734081      | 0.063780796 |
| 13  | ENSG00000182154.7_1  | MRPL41           | chr9:140445651-140447007  | -3.800949827      | 0.071746396 |
| 14  | ENSG00000148730.6_1  | EIF4EBP2         | chr10:72164135-72188374   | -3.721500134      | 0.075808313 |
| 15  | ENSG00000132467.3_1  | UTP3             | chr4:71554196-71556268    | -3.713788839      | 0.076214598 |
| 16  | ENSG00000124766.6_2  | SOX4             | chr6:21592999-21598850    | -3.622690506      | 0.081182326 |
| 17  | ENSG00000277150.1_1  | F8A3             | chrX:154686575-154688333  | -3.600933612      | 0.082415893 |
| 18  | ENSG00000238227.7_2  | C9orf69          | chr9:139006427-139010709  | -3.334717177      | 0.099117446 |
| 19  | ENSG00000233276.3_1  | GPX1             | chr3:49394609-49396033    | -3.328512383      | 0.099544652 |
| 20  | ENSG00000263020.6_2  | XXbac-BPG32J3.22 | chr6:31633879-31641323    | -3.320521523      | 0.100097544 |
| 21  | ENSG00000168286.2_1  | THAP11           | chr16:67875985-67878098   | -3.245559856      | 0.105436051 |
| 22  | ENSG00000160131.13_1 | VMA21            | chrX:150564987-150577836  | -3.114887408      | 0.115431797 |
| 23  | ENSG00000143742.12_1 | SRP9             | chr1:225965515-225978168  | -2.975837927      | 0.127111113 |
| 24  | ENSG00000100092.20_2 | SH3BP1           | chr22:38030661-38062939   | -2.952866454      | 0.129151253 |
| 25  | ENSG00000170677.5_2  | SOCS6            | chr18:67956137-67997436   | -2.949660787      | 0.129438546 |
| 26  | ENSG00000184557.4_2  | SOCS3            | chr17:76352859-76356158   | -2.937610634      | 0.130524213 |
| 27  | ENSG00000198816.6_2  | ZNF358           | chr19:7580178-7585912     | -2.921922039      | 0.131951345 |
| 28  | ENSG00000164967.9_1  | RPP25L           | chr9:34610483-34612101    | -2.897270922      | 0.134225351 |
| 29  | ENSG00000135045.6_1  | C9orf40          | chr9:77561497-77567802    | -2.881448919      | 0.135705498 |
| 30  | ENSG00000177485.6_2  | ZBTB33           | chrX:119384607-119392253  | -2.806186425      | 0.142972895 |
| 31  | ENSG00000180964.16_1 | TCEAL8           | chrX:102507923-102510131  | -2.800642692      | 0.143523343 |
| 32  | ENSG00000273841.4_2  | TAF9             | chr5:68660570-68665840    | -2.794534501      | 0.144132292 |
| 33  | ENSG00000243317.7_1  | C7orf73          | chr7:135347244-135378166  | -2.789921722      | 0.144593868 |
| 34  | ENSG00000261652.2_1  | C15orf65         | chr15:55700746-55710962   | -2.789750673      | 0.144611013 |
| 35  | ENSG00000174579.3_2  | MSL2             | chr3:135867764-135916083  | -2.75787446       | 0.147841739 |
| 36  | ENSG00000152778.8_1  | IFIT5            | chr10:91174343-91180758   | -2.662743786      | 0.157918951 |
| 37  | ENSG00000185085.2_2  | INTS5            | chr11:62414320-62420774   | -2.653060566      | 0.158982451 |
| 38  | ENSG00000165997.4_1  | ARL5B            | chr10:18948334-18970568   | -2.620839866      | 0.162573062 |
| 39  | ENSG00000142684.8_2  | ZNF593           | chr1:26496362-26497364    | -2.593407311      | 0.165693934 |
| 40  | ENSG00000176410.7_1  | DNAJC30          | chr7:73095299-73097783    | -2.580816495      | 0.167146321 |
| 41  | ENSG00000183508.4_1  | FAM46C           | chr1:118148556-118170994  | -2.578331563      | 0.167434466 |
| 42  | ENSG00000169504.14_1 | CLIC4            | chr1:25071848-25170815    | -2.565678581      | 0.168909388 |
| 43  | ENSG00000119917.13_1 | IFIT3            | chr10:91087651-91100728   | -2.561067399      | 0.169450124 |



|    |                      |                |                           |              |             |
|----|----------------------|----------------|---------------------------|--------------|-------------|
| 44 | ENSG00000126821.7_1  | SGPP1          | chr14:64150932-64194757   | -2.515042637 | 0.174943063 |
| 45 | ENSG00000166848.5_1  | TERF2IP        | chr16:75681684-75795770   | -2.505664486 | 0.176083974 |
| 46 | ENSG00000154978.12_1 | VOPP1          | chr7:55503749-55640681    | -2.5019185   | 0.176541773 |
| 47 | ENSG00000170779.10_1 | CDCA4          | chr14:105475910-105487485 | -2.499017755 | 0.176897093 |
| 48 | ENSG00000091542.8_1  | ALKBH5         | chr17:18086392-18113268   | -2.498058773 | 0.177014718 |
| 49 | ENSG00000176907.4_1  | C8orf4         | chr8:40010974-40012827    | -2.42523719  | 0.186179071 |
| 50 | ENSG00000173674.10_1 | EIF1AX         | chrX:20142636-20159962    | -2.365834049 | 0.194005028 |
| 51 | ENSG00000167552.13_1 | TUBA1A         | chr12:49578579-49583107   | -2.345829449 | 0.196713865 |
| 52 | ENSG00000136720.6_1  | HS6ST1         | chr2:128994290-129076151  | -2.337848759 | 0.197805061 |
| 53 | ENSG00000170270.4_1  | C14orf142      | chr14:93669239-93673439   | -2.336287998 | 0.198019169 |
| 54 | ENSG00000267303.1_2  | CTD-2369P2.12  | chr19:10426147-10431354   | -2.306728867 | 0.202118199 |
| 55 | ENSG00000135070.14_2 | ISCA1          | chr9:88879461-88898017    | -2.28988133  | 0.204492335 |
| 56 | ENSG00000181817.5_1  | LSM10          | chr1:36856839-36863493    | -2.262375132 | 0.208428558 |
| 57 | ENSG00000258790.1_2  | RP11-561B11.2  | chr14:35591755-35786680   | -2.251801487 | 0.209961762 |
| 58 | ENSG00000255439.6_2  | RP11-196G11.1  | chr16:31094760-31106277   | -2.241453772 | 0.211473124 |
| 59 | ENSG00000116199.11_1 | FAM20B         | chr1:178994939-179045697  | -2.23660827  | 0.212184581 |
| 60 | ENSG00000185950.8_1  | IRS2           | chr13:110405045-110438915 | -2.207603493 | 0.216493634 |
| 61 | ENSG00000119922.9_2  | IFIT2          | chr10:91043451-91069033   | -2.196387875 | 0.21818323  |
| 62 | ENSG00000124767.6_1  | GLO1           | chr6:38643701-38670917    | -2.182040416 | 0.220363866 |
| 63 | ENSG00000176788.8_2  | BASP1          | chr5:17065707-17276952    | -2.171480855 | 0.221982699 |
| 64 | ENSG00000255302.4_2  | EID1           | chr15:49170083-49172380   | -2.169197327 | 0.222334336 |
| 65 | ENSG00000115944.14_2 | COX7A2L        | chr2:42560686-42652228    | -2.161445853 | 0.223532134 |
| 66 | ENSG00000197579.7_1  | TOPORS         | chr9:32540542-32552551    | -2.142883169 | 0.226426831 |
| 67 | ENSG00000130513.6_2  | GDF15          | chr19:18485541-18499986   | -2.107802446 | 0.232000136 |
| 68 | ENSG00000188060.6_1  | RAB42          | chr1:28918712-28921955    | -2.094095803 | 0.234214808 |
| 69 | ENSG00000063322.13_1 | MED29          | chr19:39881943-39891277   | -2.075878614 | 0.237191035 |
| 70 | ENSG00000165244.6_1  | ZNF367         | chr9:99148223-99180611    | -2.06507849  | 0.238973328 |
| 71 | ENSG00000168092.13_1 | PAFAH1B2       | chr11:117014983-117047610 | -2.053074965 | 0.24096993  |
| 72 | ENSG00000180667.10_1 | YOD1           | chr1:207217194-207226325  | -2.044546011 | 0.242398721 |
| 73 | ENSG00000205765.8_1  | C5orf51        | chr5:41904290-41921738    | -2.031798004 | 0.244550106 |
| 74 | ENSG00000147955.16_1 | SIGMAR1        | chr9:34634719-34637806    | -1.993816459 | 0.251073826 |
| 75 | ENSG00000155868.7_2  | MED7           | chr5:156564423-156586030  | -1.988285353 | 0.252038258 |
| 76 | ENSG00000162702.7_1  | ZNF281         | chr1:200374068-200379184  | -1.980214079 | 0.253452258 |
| 77 | ENSG00000233493.3_1  | TMEM238        | chr19:55890613-55895966   | -1.970865955 | 0.255099866 |
| 78 | ENSG00000109089.7_1  | CDR2L          | chr17:72983727-73001895   | -1.960059587 | 0.257017841 |
| 79 | ENSG00000269711.1_2  | CTD-3214H19.16 | chr19:7743387-7747740     | -1.945205775 | 0.259677735 |
| 80 | ENSG00000196659.9_1  | TTC30B         | chr2:178413726-178417742  | -1.945199781 | 0.259678814 |
| 81 | ENSG00000179431.6_1  | FJX1           | chr11:35639967-35642416   | -1.934535373 | 0.261605473 |
| 82 | ENSG00000136193.16_2 | SCRN1          | chr7:29959719-30029905    | -1.922036021 | 0.263881841 |
| 83 | ENSG00000166275.15_2 | BORCS7         | chr10:104613980-104624718 | -1.913858321 | 0.265381863 |
| 84 | ENSG00000168209.4_1  | DDIT4          | chr10:74033678-74035794   | -1.913558496 | 0.265437021 |
| 85 | ENSG00000104140.6_1  | RHOV           | chr15:41164412-41166487   | -1.902554343 | 0.267469382 |
| 86 | ENSG00000276023.4_1  | DUSP14         | chr17:35849937-35873603   | -1.896419678 | 0.268609144 |
| 87 | ENSG00000113384.13_1 | GOLPH3         | chr5:32124810-32174456    | -1.886508335 | 0.270460847 |
| 88 | ENSG00000108179.13_1 | PPIF           | chr10:81107225-81115093   | -1.881708753 | 0.271362119 |
| 89 | ENSG00000196976.7_2  | LAGE3          | chrX:153706108-153707596  | -1.874613326 | 0.272700013 |
| 90 | ENSG00000165152.8_2  | TMEM246        | chr9:104235453-104295819  | -1.868040907 | 0.273945174 |
| 91 | ENSG00000101346.12_2 | POFUT1         | chr20:30795683-30826470   | -1.85565244  | 0.276307678 |
| 92 | ENSG00000166228.8_1  | PCBD1          | chr10:72642037-72648541   | -1.848391051 | 0.277701899 |

|     |                      |               |                           |              |             |
|-----|----------------------|---------------|---------------------------|--------------|-------------|
| 93  | ENSG00000101152.10_1 | DNAJC5        | chr20:62526535-62567384   | -1.838397873 | 0.279632146 |
| 94  | ENSG00000170540.14_2 | ARL6IP1       | chr16:18802989-18813000   | -1.838159812 | 0.279678293 |
| 95  | ENSG00000176422.13_2 | SPRYD4        | chr12:56862351-56873491   | -1.824179492 | 0.282401667 |
| 96  | ENSG00000074071.14_2 | MRPS34        | chr16:1821891-1823156     | -1.819376332 | 0.283343433 |
| 97  | ENSG00000159873.9_1  | CCDC117       | chr22:29168662-29185289   | -1.814617266 | 0.28427965  |
| 98  | ENSG00000142686.7_1  | C1orf216      | chr1:36179476-36185073    | -1.807823443 | 0.285621514 |
| 99  | ENSG00000177051.5_2  | FBXO46        | chr19:46213887-46234162   | -1.802983071 | 0.286581409 |
| 100 | ENSG00000184857.7_1  | TMEM186       | chr16:8874241-8891505     | -1.794208397 | 0.288329749 |
| 101 | ENSG00000163807.5_1  | KIAA1143      | chr3:44779153-44803154    | -1.782764152 | 0.290626034 |
| 102 | ENSG00000182307.12_1 | C8orf33       | chr8:146277764-146281416  | -1.781925209 | 0.290795085 |
| 103 | ENSG00000160007.17_2 | ARHGAP35      | chr19:47421933-47508334   | -1.777107223 | 0.29176784  |
| 104 | ENSG00000125827.8_1  | TMX4          | chr20:7957995-8000476     | -1.772850552 | 0.292629972 |
| 105 | ENSG00000198680.4_1  | TUSC1         | chr9:25676387-25678438    | -1.771137837 | 0.292977578 |
| 106 | ENSG00000041353.9_2  | RAB27B        | chr18:52385091-52562747   | -1.76718075  | 0.293782273 |
| 107 | ENSG00000171206.13_1 | TRIM8         | chr10:104404253-104418164 | -1.763337828 | 0.294565867 |
| 108 | ENSG00000128272.14_1 | ATF4          | chr22:39915700-39918690   | -1.757020835 | 0.295858483 |
| 109 | ENSG00000099864.17_2 | PALM          | chr19:708939-748329       | -1.75228172  | 0.296831947 |
| 110 | ENSG00000132825.6_1  | PPP1R3D       | chr20:58511723-58515352   | -1.729262136 | 0.301606174 |
| 111 | ENSG00000107295.9_1  | SH3GL2        | chr9:17579080-17797127    | -1.727226158 | 0.30203211  |
| 112 | ENSG00000168061.14_2 | SAC3D1        | chr11:64808373-64812300   | -1.721580303 | 0.303216401 |
| 113 | ENSG00000162734.12_2 | PEA15         | chr1:160175127-160185166  | -1.716942069 | 0.304192804 |
| 114 | ENSG00000179604.9_1  | CDC42EP4      | chr17:71279763-71308314   | -1.708768927 | 0.305921005 |
| 115 | ENSG00000122042.9_1  | UBL3          | chr13:30338508-30424821   | -1.707149348 | 0.306264627 |
| 116 | ENSG00000183513.8_1  | COA5          | chr2:99215773-99224978    | -1.702006515 | 0.307358329 |
| 117 | ENSG00000069011.15_1 | PITX1         | chr5:134363425-134370503  | -1.70165184  | 0.3074339   |
| 118 | ENSG00000084090.13_2 | STARD7        | chr2:96850597-96874563    | -1.681654201 | 0.311725007 |
| 119 | ENSG00000100941.8_1  | PNN           | chr14:39644387-39652422   | -1.680237483 | 0.312031269 |
| 120 | ENSG00000147883.10_1 | CDKN2B        | chr9:22002902-22009362    | -1.670354718 | 0.314176087 |
| 121 | ENSG00000127526.14_1 | SLC35E1       | chr19:16660642-16683193   | -1.666883449 | 0.314932936 |
| 122 | ENSG00000266472.5_1  | MRPS21        | chr1:150266140-150281414  | -1.660345848 | 0.3163633   |
| 123 | ENSG00000274211.4_2  | SOCS7         | chr17:36508111-36561846   | -1.653541696 | 0.317858881 |
| 124 | ENSG00000267426.5_2  | RP11-552F3.12 | chr17:73894726-73926210   | -1.647016265 | 0.31929984  |
| 125 | ENSG00000137040.9_2  | RANBP6        | chr9:6011043-6015625      | -1.646043982 | 0.3195151   |
| 126 | ENSG00000112697.15_1 | TMEM30A       | chr6:75962640-75994684    | -1.64582581  | 0.319563422 |
| 127 | ENSG00000254505.9_2  | CHMP4A        | chr14:24678789-24683075   | -1.645519347 | 0.319631313 |
| 128 | ENSG00000105058.11_1 | FAM32A        | chr19:16296191-16302857   | -1.639028708 | 0.321072563 |
| 129 | ENSG00000164430.15_2 | MB21D1        | chr6:74123238-74161999    | -1.630987804 | 0.322867067 |
| 130 | ENSG00000237172.3_1  | B3GNT9        | chr16:67182008-67185117   | -1.62905626  | 0.323299625 |
| 131 | ENSG00000064666.14_2 | CNN2          | chr19:1026580-1039067     | -1.628646994 | 0.323391352 |
| 132 | ENSG00000211448.11_2 | DIO2          | chr14:80663870-80854100   | -1.621011995 | 0.325107333 |
| 133 | ENSG00000112308.12_1 | C6orf62       | chr6:24705089-24721064    | -1.616020572 | 0.326234085 |
| 134 | ENSG00000128016.5_1  | ZFP36         | chr19:39897453-39900052   | -1.614846638 | 0.326499653 |
| 135 | ENSG00000162757.4_1  | C1orf74       | chr1:209952553-209957904  | -1.589884526 | 0.332198042 |
| 136 | ENSG00000224420.3_2  | ADM5          | chr19:50191921-50193832   | -1.58072545  | 0.334313739 |
| 137 | ENSG00000181827.14_2 | RFX7          | chr15:56379478-56535464   | -1.578972268 | 0.334720248 |
| 138 | ENSG00000156853.12_2 | ZNF689        | chr16:30613879-30635333   | -1.578105114 | 0.334921497 |
| 139 | ENSG00000104147.8_1  | OIP5          | chr15:41601466-41624819   | -1.571258279 | 0.336514767 |
| 140 | ENSG00000198113.2_1  | TOR4A         | chr9:140172201-140177093  | -1.563699453 | 0.338282523 |
| 141 | ENSG00000180530.10_2 | NRIP1         | chr21:16333556-16438257   | -1.558585407 | 0.33948379  |

|     |                      |              |                          |              |             |
|-----|----------------------|--------------|--------------------------|--------------|-------------|
| 142 | ENSG00000174282.11_1 | ZBTB4        | chr17:7362685-7387582    | -1.541029365 | 0.343640179 |
| 143 | ENSG00000140743.7_2  | CDR2         | chr16:22357257-22448486  | -1.536090163 | 0.34481868  |
| 144 | ENSG00000142669.14_2 | SH3BGR13     | chr1:26605667-26608013   | -1.529820772 | 0.346320388 |
| 145 | ENSG00000232434.2_1  | C9orf172     | chr9:139738867-139743253 | -1.502991452 | 0.352821051 |
| 146 | ENSG00000125148.6_1  | MT2A         | chr16:56642111-56643409  | -1.502538492 | 0.352931843 |
| 147 | ENSG00000177427.12_2 | MIEF2        | chr17:18163848-18169866  | -1.498543813 | 0.353910431 |
| 148 | ENSG00000181274.6_1  | FRAT2        | chr10:99092254-99094466  | -1.476559    | 0.359344871 |
| 149 | ENSG00000143079.14_1 | CTTNBP2NL    | chr1:112938803-113006078 | -1.469872138 | 0.361014293 |
| 150 | ENSG00000104221.12_1 | BRF2         | chr8:37700786-37707422   | -1.469139834 | 0.361197589 |
| 151 | ENSG00000198551.9_2  | ZNF627       | chr19:11670189-11729950  | -1.467698591 | 0.361558603 |
| 152 | ENSG00000136238.17_1 | RAC1         | chr7:6414154-6443608     | -1.467617521 | 0.361578921 |
| 153 | ENSG00000183309.11_1 | ZNF623       | chr8:144718183-144738588 | -1.464375563 | 0.362392358 |
| 154 | ENSG00000091436.16_1 | AC013461.1   | chr2:173940163-174132738 | -1.454294777 | 0.36493343  |
| 155 | ENSG00000173272.14_2 | MZT2A        | chr2:13222473-132250316  | -1.452223036 | 0.365457859 |
| 156 | ENSG00000143545.8_1  | RAB13        | chr1:153954093-153958834 | -1.45163135  | 0.365607774 |
| 157 | ENSG00000137331.11_1 | IER3         | chr6:30710976-30712331   | -1.449218007 | 0.366219875 |
| 158 | ENSG00000255508.7_2  | RP11-86414.1 | chr11:62327075-62359003  | -1.443031389 | 0.367793684 |
| 159 | ENSG00000080371.5_1  | RAB21        | chr12:72148654-72194065  | -1.441168925 | 0.368268798 |
| 160 | ENSG00000116251.9_2  | RPL22        | chr1:6241329-6269449     | -1.432322718 | 0.370533858 |
| 161 | ENSG00000158710.14_1 | TAGLN2       | chr1:159887897-159895522 | -1.431823094 | 0.370662201 |
| 162 | ENSG00000134086.7_1  | VHL          | chr3:10182692-10193904   | -1.43001327  | 0.371127479 |
| 163 | ENSG00000184900.15_1 | SUMO3        | chr21:46225532-46238694  | -1.425530745 | 0.372282384 |
| 164 | ENSG00000164713.9_1  | BRI3         | chr7:97881691-97939753   | -1.41500909  | 0.375007385 |
| 165 | ENSG00000196981.3_2  | WDR5B        | chr3:122131179-122134898 | -1.414955985 | 0.375021189 |
| 166 | ENSG00000213977.7_2  | TAX1BP3      | chr17:3566190-3571976    | -1.413604938 | 0.375372551 |
| 167 | ENSG00000130772.13_1 | MED18        | chr1:2865513-28662478    | -1.412339478 | 0.375701953 |
| 168 | ENSG00000123728.9_1  | RAP2C        | chrX:131337052-131353508 | -1.397719735 | 0.379528535 |
| 169 | ENSG00000130803.14_1 | ZNF317       | chr19:9251056-9274100    | -1.394578183 | 0.380355881 |
| 170 | ENSG00000171016.11_1 | PYGO1        | chr15:55831088-55881145  | -1.392165005 | 0.38099263  |
| 171 | ENSG00000204070.9_2  | SYS1         | chr20:43990577-44005438  | -1.391162269 | 0.381257528 |
| 172 | ENSG00000206418.3_1  | RAB12        | chr18:8609443-8639379    | -1.388899021 | 0.381856101 |
| 173 | ENSG00000176842.14_2 | IRX5         | chr16:54964774-54968397  | -1.388437865 | 0.38197818  |
| 174 | ENSG00000004799.7_1  | PDK4         | chr7:95212811-95225803   | -1.383585416 | 0.383265112 |
| 175 | ENSG00000182253.14_1 | SYNM         | chr15:99638420-99675798  | -1.373309    | 0.386004882 |
| 176 | ENSG00000164978.17_1 | NUDT2        | chr9:34329504-34343711   | -1.371306516 | 0.386541035 |
| 177 | ENSG00000134308.13_1 | YWHAQ        | chr2:9724101-9771143     | -1.370384569 | 0.386788131 |
| 178 | ENSG00000126878.12_1 | AIF1L        | chr9:133971863-133998539 | -1.370324394 | 0.386804264 |
| 179 | ENSG00000109787.12_1 | KLF3         | chr4:38665817-38702663   | -1.353718981 | 0.3912821   |
| 180 | ENSG00000118804.8_2  | STBD1        | chr4:77227179-77232752   | -1.347602959 | 0.392944385 |
| 181 | ENSG00000180818.4_2  | HOXC10       | chr12:54378849-54384063  | -1.346427363 | 0.393264711 |
| 182 | ENSG00000204576.11_1 | PRR3         | chr6:30524663-30531500   | -1.344525329 | 0.393783528 |
| 183 | ENSG00000155090.14_1 | KLF10        | chr8:103661007-103668130 | -1.344260079 | 0.393855935 |
| 184 | ENSG00000134109.10_1 | EDEM1        | chr3:5229331-5261642     | -1.340689332 | 0.394831957 |
| 185 | ENSG00000214357.8_1  | NEURL1B      | chr5:172068269-172118543 | -1.339185551 | 0.395243721 |
| 186 | ENSG00000198420.9_2  | TCAF1        | chr7:143548468-143599291 | -1.336805043 | 0.395896428 |
| 187 | ENSG00000167397.14_2 | VKORC1       | chr16:31102163-31107301  | -1.335666703 | 0.396208929 |
| 188 | ENSG00000117036.11_1 | ETV3         | chr1:157090983-157108266 | -1.331718886 | 0.397294607 |
| 189 | ENSG00000161671.16_2 | EMC10        | chr19:50979657-50994127  | -1.330796931 | 0.397548579 |
| 190 | ENSG00000151014.5_1  | NOCT         | chr4:139936943-139967093 | -1.33079092  | 0.397550235 |

|     |                            |          |                           |              |             |
|-----|----------------------------|----------|---------------------------|--------------|-------------|
| 191 | ENSG00000184117.11_2       | NIPSNAP1 | chr22:29950797-29977326   | -1.328796457 | 0.398100212 |
| 192 | ENSG00000119862.12_2       | LGALS1   | chr2:64681103-64688515    | -1.327268829 | 0.398521972 |
| 193 | ENSG00000197933.12_2       | ZNF823   | chr19:11832080-11849824   | -1.326250004 | 0.398803505 |
| 194 | ENSG00000173950.15_2       | XXYLT1   | chr3:194789008-194991896  | -1.326066796 | 0.398854153 |
| 195 | ENSG00000012174.11_2       | MBTPS2   | chrX:21857754-21903542    | -1.323049319 | 0.399689251 |
| 196 | ENSG00000184787.18_1       | UBE2G2   | chr21:46188495-46221934   | -1.322281152 | 0.399902124 |
| 197 | ENSG00000155115.6_1        | GTF3C6   | chr6:111279763-111289093  | -1.320880376 | 0.400290595 |
| 198 | ENSG00000113583.7_1        | C5orf15  | chr5:133291193-133304478  | -1.320650178 | 0.400354471 |
| 199 | ENSG00000127804.12_2       | METTL16  | chr17:2308856-2415185     | -1.31515914  | 0.401881162 |
| 200 | ENSG00000204103.3_1        | MAFB     | chr20:39314488-39317880   | -1.310897312 | 0.403070104 |
| 201 | ENSG00000105974.11_2       | CAV1     | chr7:116164839-116201238  | -1.310065752 | 0.403302498 |
| 202 | ENSG00000135766.8_1        | EGLN1    | chr1:231499497-231560790  | -1.307855136 | 0.403920945 |
| 203 | ENSG00000038210.12_2       | PI4K2B   | chr4:25235597-25280714    | -1.30687862  | 0.404194439 |
| 204 | ENSG00000102221.13_2       | JADE3    | chrX:46771711-46920641    | -1.306616636 | 0.404267845 |
| 205 | ENSG00000196937.10_2       | FAM3C    | chr7:120988905-121036418  | -1.300046714 | 0.406113048 |
| 206 | ENSG00000169139.11_1       | UBE2V2   | chr8:48920960-48977268    | -1.297313442 | 0.406883183 |
| 207 | ENSG00000089902.9_1        | RCOR1    | chr14:103058998-103196913 | -1.292805869 | 0.408156441 |
| 208 | ENSG00000177951.17_1       | BET1L    | chr11:167784-207428       | -1.28992645  | 0.408971878 |
| 209 | ENSG00000174007.7_1        | CEP19    | chr3:196433148-196439164  | -1.289465844 | 0.409102471 |
| 210 | ENSG00000180855.15_2       | ZNF443   | chr19:12540521-12551926   | -1.287452259 | 0.409673858 |
| 211 | ENSG00000141639.11_2       | MAPK4    | chr18:48086448-48258194   | -1.284165466 | 0.410608254 |
| 212 | ENSG00000143367.15_2       | TUFT1    | chr1:151512781-151556059  | -1.281625193 | 0.411331883 |
| 213 | ENSG00000179010.14_1       | MRFAP1   | chr4:6641818-6644472      | -1.281336186 | 0.411414291 |
| 214 | ENSG00000100335.13_2       | MIEF1    | chr22:39895437-39914137   | -1.277728617 | 0.412444351 |
| 215 | ENSG00000141034.9_2        | GID4     | chr17:17942606-17971718   | -1.27352307  | 0.413648407 |
| 216 | ENSG00000186193.8_1        | SAPCD2   | chr9:139956576-139965040  | -1.269209012 | 0.414887181 |
| 217 | ENSG00000127452.8_1        | FBXL12   | chr19:9920943-9938492     | -1.268164041 | 0.415187801 |
| 218 | ENSG00000060491.16_1       | OGFR     | chr20:61436187-61445352   | -1.267944219 | 0.415251067 |
| 219 | ENSG00000161179.13_2       | YDJC     | chr22:21982378-21984353   | -1.262683132 | 0.416768131 |
| 220 | ENSG00000133059.16_1       | DSTYK    | chr1:205111633-205180694  | -1.259115987 | 0.417799889 |
| 221 | ENSG00000197965.11_2       | MPZL1    | chr1:167690429-167761156  | -1.25684039  | 0.418459414 |
| 222 | ENSG00000214717.10_2_PAR_Y | ZBED1    | chrY:2354455-2369008      | -1.248419081 | 0.420909191 |
| 223 | ENSG00000196449.3_1        | YRDC     | chr1:38268616-38273857    | -1.238527588 | 0.42380497  |
| 224 | ENSG00000109618.11_1       | SEPSECS  | chr4:25121636-25162064    | -1.238085094 | 0.423934977 |
| 225 | ENSG00000142544.6_1        | CTU1     | chr19:51600863-51611627   | -1.234448382 | 0.42500497  |
| 226 | ENSG00000106049.8_1        | HIBADH   | chr7:27565061-27702614    | -1.230220898 | 0.426252175 |
| 227 | ENSG00000106299.7_1        | WASL     | chr7:123321989-123389121  | -1.226356232 | 0.427395543 |
| 228 | ENSG00000101000.5_1        | PROCR    | chr20:33759876-33804043   | -1.224350563 | 0.427990132 |
| 229 | ENSG00000114988.11_2       | LMAN2L   | chr2:97371666-97405801    | -1.215664342 | 0.43057476  |
| 230 | ENSG00000147164.11_1       | SNX12    | chrX:70276182-70293276    | -1.214474921 | 0.430929891 |
| 231 | ENSG00000099968.17_1       | BCL2L13  | chr22:18111621-18213621   | -1.207584292 | 0.43299303  |
| 232 | ENSG00000250067.11_2       | YJEFN3   | chr19:19639670-19648390   | -1.202497703 | 0.434522352 |
| 233 | ENSG00000198060.9_1        | MARCH5   | chr10:94050920-94113721   | -1.201030785 | 0.434964395 |
| 234 | ENSG00000179387.9_2        | ELMOD2   | chr4:141445312-141474924  | -1.196170256 | 0.436432288 |
| 235 | ENSG00000088356.5_1        | PDRG1    | chr20:30532145-30539895   | -1.195470295 | 0.436644086 |
| 236 | ENSG00000164695.4_1        | CHMP4C   | chr8:82644669-82671750    | -1.194076575 | 0.437066111 |
| 237 | ENSG00000152484.13_1       | USP12    | chr13:27640279-27746033   | -1.192096959 | 0.43766625  |
| 238 | ENSG00000113552.15_2       | GNPDA1   | chr5:141371314-141392606  | -1.188840742 | 0.438655195 |
| 239 | ENSG00000136295.14_1       | TTYH3    | chr7:2671585-2704436      | -1.18592271  | 0.439543328 |

|     |                      |             |                           |              |             |
|-----|----------------------|-------------|---------------------------|--------------|-------------|
| 240 | ENSG00000204271.11_2 | SPIN3       | chrX:57002803-57021970    | -1.180715532 | 0.441132656 |
| 241 | ENSG00000171848.13_1 | RRM2        | chr2:10262455-10271546    | -1.18065906  | 0.441149924 |
| 242 | ENSG00000100811.11_2 | YY1         | chr14:100704635-100749129 | -1.17766718  | 0.442065735 |
| 243 | ENSG00000176890.15_1 | TYMS        | chr18:657604-673578       | -1.174363322 | 0.443079252 |
| 244 | ENSG00000134686.17_2 | PHC2        | chr1:33789224-33896653    | -1.171696105 | 0.443899163 |
| 245 | ENSG00000065559.14_2 | MAP2K4      | chr17:11924141-12047147   | -1.170424223 | 0.444290678 |
| 246 | ENSG00000136999.4_1  | NOV         | chr8:120428546-120436593  | -1.168412302 | 0.444910699 |
| 247 | ENSG00000150776.17_1 | C11orf57    | chr11:111944810-111955874 | -1.168182432 | 0.444981594 |
| 248 | ENSG00000006695.10_1 | COX10       | chr17:13972813-14111994   | -1.167030107 | 0.445337157 |
| 249 | ENSG00000142556.18_2 | ZNF614      | chr19:52516018-52533493   | -1.164558191 | 0.446100852 |
| 250 | ENSG00000247077.6_2  | PGAM5       | chr12:133287405-133299320 | -1.161486265 | 0.447051745 |
| 251 | ENSG00000184731.5_1  | FAM110C     | chr2:38814-46870          | -1.156246264 | 0.448678431 |
| 252 | ENSG00000159228.12_1 | CBR1        | chr21:37442239-37445464   | -1.154935335 | 0.449086315 |
| 253 | ENSG00000103111.14_2 | MON1B       | chr16:77224732-77236302   | -1.152084994 | 0.449974454 |
| 254 | ENSG00000101444.12_2 | AHCY        | chr20:32868074-32899608   | -1.146048796 | 0.45186108  |
| 255 | ENSG00000136197.12_2 | C7orf25     | chr7:42948325-42951904    | -1.145468419 | 0.452042894 |
| 256 | ENSG00000280071.3_2  | CH507-9B2.3 | chr21:45553509-45602558   | -1.144227329 | 0.452431935 |
| 257 | ENSG00000186666.5_1  | BCDIN3D     | chr12:50229822-50236912   | -1.143963356 | 0.452514725 |
| 258 | ENSG00000186432.8_2  | KPNA4       | chr3:160212783-160283376  | -1.140660089 | 0.453552012 |
| 259 | ENSG00000181894.14_1 | ZNF329      | chr19:58637619-58666477   | -1.140636281 | 0.453559497 |
| 260 | ENSG00000134352.19_1 | IL6ST       | chr5:55230923-55290821    | -1.135902635 | 0.455050122 |
| 261 | ENSG00000169964.6_2  | TMEM42      | chr3:44903361-44907162    | -1.135048975 | 0.45531946  |
| 262 | ENSG00000134986.13_2 | NREP        | chr5:110998318-111333161  | -1.122530637 | 0.45928748  |
| 263 | ENSG00000061794.12_2 | MRPS35      | chr12:27863706-27909228   | -1.118206171 | 0.460666256 |
| 264 | ENSG00000029993.14_1 | HMGB3       | chrX:150148982-150159248  | -1.115014779 | 0.461686426 |
| 265 | ENSG00000177383.4_2  | MAGEF1      | chr3:184428155-184429790  | -1.113584492 | 0.462144368 |
| 266 | ENSG00000123505.15_2 | AMD1        | chr6:111195973-111216916  | -1.113569761 | 0.462149087 |
| 267 | ENSG00000138071.13_2 | ACTR2       | chr2:65454887-65498387    | -1.109890301 | 0.46332926  |
| 268 | ENSG00000188277.9_1  | C15orf62    | chr15:41062278-41064647   | -1.109118474 | 0.463577203 |
| 269 | ENSG00000064652.10_1 | SNX24       | chr5:122179134-122365049  | -1.105374982 | 0.464781651 |
| 270 | ENSG00000007376.7_1  | RPUSD1      | chr16:834974-838397       | -1.104094399 | 0.465194389 |
| 271 | ENSG00000072954.6_1  | TMEM38A     | chr19:16771938-16800840   | -1.103699242 | 0.465321824 |
| 272 | ENSG00000171425.9_2  | ZNF581      | chr19:56146825-56156988   | -1.096846079 | 0.467537478 |
| 273 | ENSG00000198182.12_2 | ZNF607      | chr19:38187264-38210691   | -1.096341991 | 0.467700867 |
| 274 | ENSG00000176058.11_2 | TPRN        | chr9:140086069-140098645  | -1.093888603 | 0.468496897 |
| 275 | ENSG00000102554.13_1 | KLF5        | chr13:73629114-73651680   | -1.090683187 | 0.469538972 |
| 276 | ENSG00000213689.10_2 | TREX1       | chr3:48507210-48509044    | -1.090109306 | 0.469725784 |
| 277 | ENSG00000196072.11_1 | BLOC1S2     | chr10:102033037-102046469 | -1.089284417 | 0.469994436 |
| 278 | ENSG00000103353.15_2 | UBFD1       | chr16:23568683-23585710   | -1.088321523 | 0.470308228 |
| 279 | ENSG00000103152.11_2 | MPG         | chr16:127006-135852       | -1.086055582 | 0.471047489 |
| 280 | ENSG00000158792.15_1 | SPATA2L     | chr16:89762751-89768113   | -1.085644932 | 0.471181587 |
| 281 | ENSG00000100422.13_1 | CERK        | chr22:47080308-47134158   | -1.084377686 | 0.471595649 |
| 282 | ENSG00000162419.12_1 | GMEB1       | chr1:28995244-29045865    | -1.084191467 | 0.471656525 |
| 283 | ENSG00000167625.10_2 | ZNF526      | chr19:42724423-42732353   | -1.084079392 | 0.471693167 |
| 284 | ENSG00000186665.9_2  | C17orf58    | chr17:65987217-65992547   | -1.082915705 | 0.472073792 |
| 285 | ENSG00000105879.11_1 | CBLL1       | chr7:107384142-107402112  | -1.082674269 | 0.4721528   |
| 286 | ENSG00000150907.7_2  | FOXO1       | chr13:41044090-41240734   | -1.079568694 | 0.47317026  |
| 287 | ENSG00000177674.15_2 | AGTRAP      | chr1:11796141-11814859    | -1.075762407 | 0.474420282 |
| 288 | ENSG00000122958.14_1 | VPS26A      | chr10:70883268-70932617   | -1.075135096 | 0.474626614 |

|     |                      |               |                          |              |             |
|-----|----------------------|---------------|--------------------------|--------------|-------------|
| 289 | ENSG00000175087.9_1  | PDIK1L        | chr1:26437656-26452034   | -1.074931123 | 0.474693723 |
| 290 | ENSG00000213096.10_2 | ZNF254        | chr19:24216207-24312763  | -1.072951152 | 0.475345645 |
| 291 | ENSG00000174206.12_1 | C12orf66      | chr12:64580096-64616076  | -1.070044608 | 0.476304271 |
| 292 | ENSG00000104228.12_1 | TRIM35        | chr8:27142404-27168836   | -1.0671895   | 0.477247816 |
| 293 | ENSG00000089818.16_1 | NECAP1        | chr12:8234807-8250367    | -1.065779305 | 0.477714541 |
| 294 | ENSG00000183741.11_1 | CBX6          | chr22:39257455-39268319  | -1.064197509 | 0.478238603 |
| 295 | ENSG00000266967.6_2  | AARSD1        | chr17:41102543-41116515  | -1.063179608 | 0.478576145 |
| 296 | ENSG00000119812.18_2 | FAM98A        | chr2:33808725-33824449   | -1.063168964 | 0.478579676 |
| 297 | ENSG00000124657.1_1  | OR2B6         | chr6:27925019-27925960   | -1.062428459 | 0.478825384 |
| 298 | ENSG00000213920.8_2  | MDP1          | chr14:24683143-24685276  | -1.061267052 | 0.479211006 |
| 299 | ENSG00000163171.7_1  | CDC42EP3      | chr2:37869025-37965611   | -1.057761741 | 0.480376759 |
| 300 | ENSG00000164265.8_1  | SCGB3A2       | chr5:147250245-147261754 | -1.056722606 | 0.480722886 |
| 301 | ENSG00000261915.6_2  | RP11-542C16.2 | chr17:7215980-7222493    | -1.050634109 | 0.482755932 |
| 302 | ENSG00000112242.14_2 | E2F3          | chr6:20402137-20493946   | -1.046919121 | 0.484000646 |
| 303 | ENSG00000146223.14_1 | RPL7L1        | chr6:42847356-42857663   | -1.044706656 | 0.484743462 |
| 304 | ENSG00000110651.11_2 | CD81          | chr11:2397407-2418649    | -1.044377613 | 0.484854032 |
| 305 | ENSG00000119414.11_1 | PPP6C         | chr9:127908852-127952218 | -1.044170385 | 0.484923681 |
| 306 | ENSG00000165355.7_2  | FBXO33        | chr14:39866873-39901704  | -1.04154303  | 0.485807602 |
| 307 | ENSG00000119335.16_2 | SET           | chr9:131445703-131458679 | -1.040755394 | 0.4860729   |
| 308 | ENSG00000116857.16_2 | TMEM9         | chr1:201103900-201140702 | -1.039421073 | 0.486522667 |
| 309 | ENSG00000165704.14_1 | HPRT1         | chrX:133594183-133654543 | -1.037888029 | 0.487039933 |
| 310 | ENSG00000105438.8_1  | KDELRL1       | chr19:48885827-48894810  | -1.034247141 | 0.488270614 |
| 311 | ENSG00000107371.12_2 | EXOSC3        | chr9:37766975-37801434   | -1.031187096 | 0.489307365 |
| 312 | ENSG00000164008.14_2 | C1orf50       | chr1:43232940-43241418   | -1.029202234 | 0.489981018 |
| 313 | ENSG00000119541.9_2  | VPS4B         | chr18:61056423-61089716  | -1.028526184 | 0.490210678 |
| 314 | ENSG00000164823.9_1  | OSGIN2        | chr8:90914087-90940116   | -1.026974534 | 0.490738194 |
| 315 | ENSG00000011052.21_2 | NME1-NME2     | chr17:49230951-49249105  | -1.026869726 | 0.490773846 |
| 316 | ENSG00000170584.10_1 | NUDCD2        | chr5:162873532-162887146 | -1.026824881 | 0.490789102 |
| 317 | ENSG00000106367.13_2 | APIS1         | chr7:100797678-100804877 | -1.022428941 | 0.492286834 |
| 318 | ENSG00000167513.8_1  | CDT1          | chr16:88869621-88875666  | -1.021262692 | 0.49268495  |
| 319 | ENSG00000160803.7_1  | UBQLN4        | chr1:156005092-156023585 | -1.019186016 | 0.493394652 |
| 320 | ENSG00000180776.15_2 | ZDHHC20       | chr13:21946712-22033509  | -1.016837444 | 0.494198506 |
| 321 | ENSG00000283149.1_1  | RP11-134F2.8  | chr3:186299784-186314892 | -1.016005592 | 0.494483542 |
| 322 | ENSG00000250722.5_2  | SEPP1         | chr5:42799982-42887494   | -1.015663401 | 0.494600841 |
| 323 | ENSG00000100219.16_2 | XBP1          | chr22:29190543-29196585  | -1.010623761 | 0.496331608 |
| 324 | ENSG00000100324.13_1 | TAB1          | chr22:39795746-39833065  | -1.010328236 | 0.496433288 |
| 325 | ENSG00000267645.5_2  | RP11-577H5.5  | chr7:102277496-102312088 | -1.009344593 | 0.496771877 |
| 326 | ENSG00000114383.9_2  | TUSC2         | chr3:50357458-50365682   | -1.009147344 | 0.496839801 |
| 327 | ENSG00000116704.7_1  | SLC35D1       | chr1:67465015-67519782   | -1.008933854 | 0.496913329 |
| 328 | ENSG00000179151.11_2 | EDC3          | chr15:74922899-74988633  | -1.006864122 | 0.497626727 |
| 329 | ENSG00000117280.12_1 | RAB29         | chr1:205737114-205744588 | -1.002283961 | 0.499209066 |
| 330 | ENSG00000085491.15_1 | SLC25A24      | chr1:108676658-108743471 | -1.001694836 | 0.499412959 |
| 331 | ENSG00000173581.7_2  | CCDC106       | chr19:56152428-56164527  | -0.997715086 | 0.500792518 |
| 332 | ENSG00000197766.7_1  | CFD           | chr19:859643-863630      | -0.996496733 | 0.501215615 |
| 333 | ENSG00000139233.6_2  | LLPH          | chr12:66510335-66524548  | -0.993680093 | 0.502195117 |
| 334 | ENSG00000135801.9_1  | TAF5L         | chr1:229728858-229761794 | -0.992301681 | 0.502675165 |
| 335 | ENSG00000173480.10_2 | ZNF417        | chr19:58411664-58427978  | -0.992237121 | 0.50269766  |
| 336 | ENSG00000184709.7_2  | LRRC26        | chr9:140063210-140064503 | -0.9921175   | 0.502739343 |
| 337 | ENSG00000167202.11_2 | TBC1D2B       | chr15:78276378-78370066  | -0.991080519 | 0.503100832 |

|     |                      |            |                           |              |             |
|-----|----------------------|------------|---------------------------|--------------|-------------|
| 338 | ENSG00000104687.12_1 | GSR        | chr8:30535578-30585443    | -0.985908437 | 0.504907692 |
| 339 | ENSG00000204366.3_1  | ZBTB12     | chr6:31867384-31869769    | -0.982127287 | 0.506232737 |
| 340 | ENSG00000076067.11_1 | RBMS2      | chr12:56915713-56989980   | -0.982114552 | 0.506237206 |
| 341 | ENSG00000147586.9_2  | MRPS28     | chr8:80830952-80942524    | -0.978681982 | 0.507443118 |
| 342 | ENSG00000082213.17_2 | C5orf22    | chr5:31532373-31555165    | -0.978584004 | 0.507477581 |
| 343 | ENSG00000164105.3_1  | SAP30      | chr4:174291120-174298683  | -0.974796464 | 0.508811624 |
| 344 | ENSG00000163900.10_1 | TMEM41A    | chr3:185194284-185216845  | -0.97311086  | 0.509406453 |
| 345 | ENSG00000168899.4_1  | VAMP5      | chr2:85811531-85820535    | -0.971404478 | 0.510009322 |
| 346 | ENSG00000168566.12_1 | SNRNP48    | chr6:7590432-7612200      | -0.971238192 | 0.510068109 |
| 347 | ENSG00000182141.10_2 | ZNF708     | chr19:21473962-21512227   | -0.969907231 | 0.510538891 |
| 348 | ENSG00000178691.10_1 | SUZ12      | chr17:30264037-30328064   | -0.96815788  | 0.511158324 |
| 349 | ENSG00000164024.7    | METAP1     | chr4:99916771-99983964    | -0.965919743 | 0.511951929 |
| 350 | ENSG00000172757.12_2 | CFL1       | chr11:65590493-65629497   | -0.962237515 | 0.513260266 |
| 351 | ENSG00000139990.17_1 | DCAF5      | chr14:69517598-69619867   | -0.958676686 | 0.514528649 |
| 352 | ENSG00000198176.12_1 | TFDP1      | chr13:114239036-114295785 | -0.95797686  | 0.514778299 |
| 353 | ENSG00000164631.18_1 | ZNF12      | chr7:6728064-6746554      | -0.954087505 | 0.516167959 |
| 354 | ENSG00000164294.13_1 | GPX8       | chr5:54455946-54462899    | -0.953526857 | 0.516368587 |
| 355 | ENSG00000043355.11_2 | ZIC2       | chr13:100634026-100639027 | -0.953236567 | 0.516472498 |
| 356 | ENSG00000115275.11_2 | MOGS       | chr2:74688184-74692537    | -0.952922935 | 0.516584788 |
| 357 | ENSG00000118898.15_2 | PPL        | chr16:4932508-5010742     | -0.952620997 | 0.516692914 |
| 358 | ENSG00000102871.15_1 | TRADD      | chr16:67188083-67194201   | -0.951341917 | 0.517151212 |
| 359 | ENSG00000120327.6_2  | PCDHB14    | chr5:140602504-140607331  | -0.951322953 | 0.51715801  |
| 360 | ENSG00000120509.10_1 | PDZD11     | chrX:69506445-69510364    | -0.95085034  | 0.517327454 |
| 361 | ENSG00000189280.3_1  | GJB5       | chr1:35220648-35224113    | -0.949628255 | 0.51776586  |
| 362 | ENSG00000005100.12_2 | DHX33      | chr17:5344232-5372380     | -0.947760088 | 0.518436757 |
| 363 | ENSG00000169955.7_2  | ZNF747     | chr16:30541688-30546668   | -0.946942272 | 0.518730725 |
| 364 | ENSG00000112425.13_1 | EPM2A      | chr6:145822719-146057160  | -0.945736688 | 0.519164381 |
| 365 | ENSG00000181938.13_1 | GINS3      | chr16:58328984-58440048   | -0.944704397 | 0.519535992 |
| 366 | ENSG00000167220.11_2 | HDHD2      | chr18:44633774-44676891   | -0.942841671 | 0.52020722  |
| 367 | ENSG00000161021.11_2 | MAML1      | chr5:179159851-179223512  | -0.942711428 | 0.520254186 |
| 368 | ENSG00000203668.2_2  | CHML       | chr1:241792155-241803556  | -0.942399196 | 0.520366793 |
| 369 | ENSG00000166823.5_1  | MESP1      | chr15:90291892-90294541   | -0.94184317  | 0.520567385 |
| 370 | ENSG00000215033.3    | AL603965.1 | chr10:47746962-47770871   | -0.938881858 | 0.521637012 |
| 371 | ENSG00000148331.11_1 | ASB6       | chr9:132396883-132404448  | -0.937144506 | 0.522265566 |
| 372 | ENSG00000174151.14_2 | CYB561D1   | chr1:110036674-110045554  | -0.937074966 | 0.522290741 |
| 373 | ENSG00000135002.11_2 | RFK        | chr9:79000433-79009433    | -0.935897331 | 0.522717248 |
| 374 | ENSG00000185818.7_1  | NAT8L      | chr4:2061239-2070816      | -0.935317247 | 0.522927466 |
| 375 | ENSG00000198498.9_2  | TMA16      | chr4:164415594-164441691  | -0.934001389 | 0.523404637 |
| 376 | ENSG00000145293.15_2 | ENOPH1     | chr4:83351715-83382244    | -0.928834217 | 0.52528263  |
| 377 | ENSG00000133193.12_1 | FAM104A    | chr17:71203492-71232892   | -0.928763147 | 0.525308507 |
| 378 | ENSG00000189159.15_2 | HN1        | chr17:73131343-73164376   | -0.927115652 | 0.525908729 |
| 379 | ENSG00000111707.11_1 | SUDS3      | chr12:118814185-118855836 | -0.923100444 | 0.52737444  |
| 380 | ENSG00000104205.12_2 | SGK3       | chr8:67624653-67774257    | -0.918546429 | 0.529041782 |
| 381 | ENSG00000215020.3    | AL591684.1 | chr10:48255279-48279199   | -0.916453714 | 0.529809745 |
| 382 | ENSG00000136048.13_2 | DRAM1      | chr12:102271129-102405908 | -0.910193931 | 0.532113558 |
| 383 | ENSG00000102390.10_2 | PBDC1      | chrX:75392771-75398039    | -0.909039782 | 0.532539417 |
| 384 | ENSG00000131370.15_1 | SH3BP5     | chr3:15296360-15382875    | -0.907849103 | 0.532979112 |
| 385 | ENSG00000147471.11_2 | PROSC      | chr8:37620111-37637285    | -0.907200412 | 0.533218813 |
| 386 | ENSG00000166595.11_2 | FAM96B     | chr16:66965958-66968326   | -0.902785944 | 0.534852895 |

|     |                      |                |                           |              |             |
|-----|----------------------|----------------|---------------------------|--------------|-------------|
| 387 | ENSG00000203667.9_1  | COX20          | chr1:244998624-245008359  | -0.896848731 | 0.537058544 |
| 388 | ENSG00000142178.7_1  | SIK1           | chr21:44834395-44847008   | -0.896308015 | 0.537259869 |
| 389 | ENSG00000079462.7_1  | PAFAH1B3       | chr19:42801185-42807698   | -0.895252507 | 0.537653084 |
| 390 | ENSG00000250021.7_2  | C15orf38-AP3S2 | chr15:90377540-90456114   | -0.893017703 | 0.538486581 |
| 391 | ENSG00000136371.10_2 | MTHFS          | chr15:80125927-80189721   | -0.892256971 | 0.538770599 |
| 392 | ENSG00000107829.13_1 | FBXW4          | chr10:103370421-103455052 | -0.891939658 | 0.538889112 |
| 393 | ENSG00000139173.9_1  | TMEM117        | chr12:44229770-44783545   | -0.891025505 | 0.539230683 |
| 394 | ENSG00000198892.6_1  | SHISA4         | chr1:201857808-201861434  | -0.889601165 | 0.539763316 |
| 395 | ENSG00000162704.15_2 | ARPC5          | chr1:183589981-183604892  | -0.888843861 | 0.540046725 |
| 396 | ENSG00000176182.5_1  | MYPOP          | chr19:46393278-46405862   | -0.888625859 | 0.540128336 |
| 397 | ENSG00000157657.14_2 | ZNF618         | chr9:116638562-116818871  | -0.884013669 | 0.54185785  |
| 398 | ENSG00000140497.16_2 | SCAMP2         | chr15:75136071-75165706   | -0.881589518 | 0.542769095 |
| 399 | ENSG00000106605.10_2 | BLVRA          | chr7:43798279-43846941    | -0.879520184 | 0.543548176 |
| 400 | ENSG00000112972.14_2 | HMGCS1         | chr5:43289497-43313614    | -0.879146771 | 0.543688881 |
| 401 | ENSG00000235863.3_1  | B3GALT4        | chr6:33244909-33252609    | -0.878526809 | 0.543922568 |
| 402 | ENSG00000117318.8_1  | ID3            | chr1:23884409-23886285    | -0.877837586 | 0.54418248  |
| 403 | ENSG00000213347.10_2 | MXD3           | chr5:176728462-176739758  | -0.876307115 | 0.544760077 |
| 404 | ENSG00000106266.9_2  | SNX8           | chr7:2291405-2393953      | -0.876197762 | 0.544801371 |
| 405 | ENSG00000197324.8_2  | LRP10          | chr14:23340822-23350789   | -0.875502363 | 0.545064036 |
| 406 | ENSG00000139505.11_1 | MTMR6          | chr13:25820339-25862147   | -0.874118797 | 0.545587011 |
| 407 | ENSG00000156973.13_1 | PDE6D          | chr2:232597135-232650982  | -0.873474175 | 0.545830844 |
| 408 | ENSG00000177311.11_2 | ZBTB38         | chr3:141043055-141168634  | -0.871860249 | 0.5464418   |
| 409 | ENSG00000128626.11_1 | MRPS12         | chr19:39421188-39423802   | -0.86884647  | 0.547584506 |
| 410 | ENSG00000082196.20_2 | C1QTNF3        | chr5:34019553-34043937    | -0.868836214 | 0.547588398 |
| 411 | ENSG00000155287.10_1 | SLC25A28       | chr10:101370279-101380366 | -0.868704573 | 0.547638366 |
| 412 | ENSG00000164438.5_1  | TLX3           | chr5:170736288-170739138  | -0.867185261 | 0.548215392 |
| 413 | ENSG00000142961.14_2 | MOB3C          | chr1:47073387-47082563    | -0.865670049 | 0.548791466 |
| 414 | ENSG00000277462.1_2  | ZNF670         | chr1:247200086-247242057  | -0.863554092 | 0.549596952 |
| 415 | ENSG00000198931.10_1 | APRT           | chr16:88875747-88878352   | -0.863013724 | 0.549802845 |
| 416 | ENSG00000143811.17_2 | PYCR2          | chr1:226107577-226112040  | -0.862115644 | 0.550145204 |
| 417 | ENSG00000100605.16_2 | ITPK1          | chr14:93403259-93582665   | -0.862069936 | 0.550162634 |
| 418 | ENSG00000198162.12_2 | MAN1A2         | chr1:117910071-118071494  | -0.861377371 | 0.550426803 |
| 419 | ENSG00000146834.13_1 | MEPCE          | chr7:100026413-100031749  | -0.857660999 | 0.551846526 |
| 420 | ENSG00000164296.6_1  | TIGD6          | chr5:149372681-149380730  | -0.854849313 | 0.552923075 |
| 421 | ENSG00000260007.2_2  | RP11-315D16.2  | chr15:68476370-68522056   | -0.853269907 | 0.553528726 |
| 422 | ENSG00000158234.12_2 | FAIM           | chr3:138327448-138352218  | -0.853036374 | 0.553618334 |
| 423 | ENSG00000151532.13_1 | VTG1A          | chr10:114206756-114578503 | -0.852839109 | 0.553694037 |
| 424 | ENSG00000090776.5_1  | EFNB1          | chrX:68048840-68061990    | -0.851879397 | 0.554062489 |
| 425 | ENSG00000175793.11_2 | SFN            | chr1:27189629-27190948    | -0.851145222 | 0.554344518 |
| 426 | ENSG00000184378.2_2  | ACTRT3         | chr3:169484709-169487683  | -0.849333684 | 0.555041025 |
| 427 | ENSG00000181690.7_1  | PLAG1          | chr8:57073463-57123883    | -0.848138083 | 0.555501194 |
| 428 | ENSG00000025293.16_2 | PHF20          | chr20:34359896-34538303   | -0.84355816  | 0.557267468 |
| 429 | ENSG00000117593.9_1  | DARS2          | chr1:173793641-173827684  | -0.843199365 | 0.557406077 |
| 430 | ENSG00000196670.13_1 | ZFP62          | chr5:180274611-180288285  | -0.841407398 | 0.558098859 |
| 431 | ENSG00000115808.11_1 | STRN           | chr2:37070783-37193615    | -0.84102379  | 0.558247276 |
| 432 | ENSG00000149084.12_2 | HSD17B12       | chr11:43702108-43878167   | -0.84019868  | 0.558566641 |
| 433 | ENSG00000106608.16_2 | URGCP          | chr7:43915493-43966010    | -0.838883695 | 0.559075994 |
| 434 | ENSG00000265241.6_2  | RBM8A          | chr1:145507415-145517375  | -0.835222513 | 0.560496585 |
| 435 | ENSG00000162236.11_2 | STX5           | chr11:62574369-62599560   | -0.834511798 | 0.56077277  |



|     |                      |               |                           |              |             |
|-----|----------------------|---------------|---------------------------|--------------|-------------|
| 436 | ENSG0000067167.7_1   | TRAM1         | chr8:71485677-71520622    | -0.833792568 | 0.561052403 |
| 437 | ENSG00000103343.12_2 | ZNF174        | chr16:3451235-3459370     | -0.833753438 | 0.561067621 |
| 438 | ENSG00000175334.7_1  | BANF1         | chr11:65769550-65771620   | -0.832482508 | 0.561562106 |
| 439 | ENSG00000132768.13_1 | DPH2          | chr1:44435672-44439041    | -0.830728211 | 0.562245373 |
| 440 | ENSG0000066027.11_2  | PPP2R5A       | chr1:212458879-212535205  | -0.830071945 | 0.562501191 |
| 441 | ENSG00000187514.15_2 | PTMA          | chr2:232571605-232578251  | -0.82937162  | 0.562774311 |
| 442 | ENSG00000144567.10_2 | FAM134A       | chr2:220040947-220050201  | -0.827087946 | 0.563665844 |
| 443 | ENSG00000163013.11_1 | FBXO41        | chr2:73481810-73511559    | -0.826787776 | 0.563783134 |
| 444 | ENSG00000108788.11_1 | MLX           | chr17:40719086-40725257   | -0.826417435 | 0.563927876 |
| 445 | ENSG00000180957.17_2 | PITPNB        | chr22:28247657-28316122   | -0.825884999 | 0.564136036 |
| 446 | ENSG00000132773.11_1 | TOE1          | chr1:45805342-45809647    | -0.823445009 | 0.56509095  |
| 447 | ENSG00000140262.17_1 | TCF12         | chr15:57210821-57591479   | -0.822678174 | 0.565391393 |
| 448 | ENSG00000108578.14_1 | BLMH          | chr17:28575213-28619074   | -0.819093471 | 0.566797983 |
| 449 | ENSG00000154710.15_2 | RABGEF1       | chr7:66147151-66276451    | -0.817764455 | 0.56732036  |
| 450 | ENSG00000219200.6    | RNASEK        | chr17:6915736-6917851     | -0.817570648 | 0.567396577 |
| 451 | ENSG00000276966.2_1  | HIST1H4E      | chr6:26204780-26206266    | -0.814554525 | 0.568584027 |
| 452 | ENSG00000205903.6_2  | ZNF316        | chr7:6676953-6696063      | -0.813935933 | 0.568827874 |
| 453 | ENSG00000255641.1_2  | RP11-277P12.6 | chr12:10564911-10588600   | -0.813796475 | 0.568882862 |
| 454 | ENSG00000132359.14_2 | RAP1GAP2      | chr17:2658999-2941033     | -0.813335666 | 0.569064597 |
| 455 | ENSG00000070367.15_1 | EXOC5         | chr14:57667225-57735726   | -0.81323765  | 0.56910326  |
| 456 | ENSG00000132004.12_1 | FBXW9         | chr19:12798867-12807457   | -0.811762557 | 0.569685441 |
| 457 | ENSG00000153071.14_2 | DAB2          | chr5:39371777-39462402    | -0.810796872 | 0.570066895 |
| 458 | ENSG00000075223.13_1 | SEMA3C        | chr7:80371854-80551675    | -0.809612985 | 0.570534888 |
| 459 | ENSG00000114850.6_1  | SSR3          | chr3:156257929-156272973  | -0.807535978 | 0.571356863 |
| 460 | ENSG00000151748.14_2 | SAV1          | chr14:51098776-51135049   | -0.805195742 | 0.572284429 |
| 461 | ENSG00000105329.9_1  | TGFB1         | chr19:41807492-41859816   | -0.804027755 | 0.57274793  |
| 462 | ENSG00000185220.11_1 | PGBD2         | chr1:249200395-249214145  | -0.803989218 | 0.57276323  |
| 463 | ENSG00000058804.11_1 | NDC1          | chr1:54231133-54304533    | -0.803701917 | 0.572877302 |
| 464 | ENSG00000077684.15_2 | JADE1         | chr4:129730778-129796379  | -0.800401356 | 0.574189416 |
| 465 | ENSG00000172346.14_1 | CSDC2         | chr22:41956767-41973745   | -0.798682778 | 0.574873814 |
| 466 | ENSG00000108669.16_2 | CYTH1         | chr17:76670130-76778379   | -0.798517052 | 0.574939855 |
| 467 | ENSG00000129521.13_2 | EGLN3         | chr14:34393437-34931980   | -0.797943633 | 0.575168418 |
| 468 | ENSG00000120784.15_2 | ZFP30         | chr19:38104650-38183238   | -0.797631314 | 0.575292946 |
| 469 | ENSG00000148153.13_1 | INIP          | chr9:115446206-115480516  | -0.796506855 | 0.575741513 |
| 470 | ENSG00000109586.11_1 | GALNT7        | chr4:174089904-174245118  | -0.796374073 | 0.575794505 |
| 471 | ENSG00000182149.20_2 | IST1          | chr16:71879899-71965102   | -0.796042948 | 0.575926676 |
| 472 | ENSG00000168792.4_1  | ABHD15        | chr17:27887565-27894155   | -0.791931231 | 0.577570423 |
| 473 | ENSG00000212127.5_2  | TAS2R14       | chr12:11090005-11324172   | -0.791457809 | 0.577759984 |
| 474 | ENSG00000108061.11_1 | SHOC2         | chr10:112679305-112773425 | -0.791429278 | 0.57777141  |
| 475 | ENSG00000122870.11_2 | BICC1         | chr10:60272900-60591197   | -0.79096912  | 0.577955724 |
| 476 | ENSG00000132275.10_1 | RRP8          | chr11:6616305-6624850     | -0.789486621 | 0.578549931 |
| 477 | ENSG00000175063.16_1 | UBE2C         | chr20:44441215-44445596   | -0.789230858 | 0.578652506 |
| 478 | ENSG00000198363.16_2 | ASPH          | chr8:62413115-62627199    | -0.788908178 | 0.578781945 |
| 479 | ENSG00000114166.7_1  | KAT2B         | chr3:20081515-20195896    | -0.788070291 | 0.579118186 |
| 480 | ENSG00000142871.16_2 | CYR61         | chr1:86046444-86049645    | -0.787178011 | 0.579476471 |
| 481 | ENSG00000172795.15_1 | DCP2          | chr5:112312399-112356667  | -0.786272072 | 0.579840467 |
| 482 | ENSG00000141580.15_2 | WDR45B        | chr17:80572438-80606429   | -0.783267764 | 0.581049201 |
| 483 | ENSG00000104899.6_2  | AMH           | chr19:2249308-2252072     | -0.781733552 | 0.581667438 |
| 484 | ENSG00000128886.11_2 | ELL3          | chr15:44064798-44069741   | -0.780586032 | 0.58213028  |

|     |                            |          |                          |              |             |
|-----|----------------------------|----------|--------------------------|--------------|-------------|
| 485 | ENSG00000278535.4_2        | DHRS11   | chr17:34948228-34957235  | -0.780262462 | 0.582260856 |
| 486 | ENSG00000130813.17_2       | C19orf66 | chr19:10196798-10203928  | -0.780239665 | 0.582270057 |
| 487 | ENSG00000132541.10_2       | RIDA     | chr8:99114572-99129469   | -0.779748992 | 0.582468125 |
| 488 | ENSG00000106524.8_1        | ANKMY2   | chr7:16639401-16685442   | -0.778534666 | 0.582958599 |
| 489 | ENSG00000072042.12_2       | RDH11    | chr14:68143518-68162531  | -0.778164082 | 0.583108362 |
| 490 | ENSG00000203724.10_1       | C1orf53  | chr1:197871777-197876497 | -0.776779987 | 0.583668054 |
| 491 | ENSG00000113460.12_1       | BRIX1    | chr5:34915481-34926101   | -0.775126023 | 0.584337579 |
| 492 | ENSG00000103855.17_1       | CD276    | chr15:73976307-74006859  | -0.774429319 | 0.584619834 |
| 493 | ENSG00000127080.9_1        | IPPK     | chr9:95375466-95432547   | -0.77399053  | 0.584797671 |
| 494 | ENSG00000273173.5_2        | SNURF    | chr15:25200133-25222997  | -0.771288536 | 0.585893953 |
| 495 | ENSG00000139291.13_2       | TMEM19   | chr12:72079867-72098826  | -0.768873878 | 0.586875392 |
| 496 | ENSG00000143147.14_1       | GPR161   | chr1:168048781-168106905 | -0.767981265 | 0.587238612 |
| 497 | ENSG00000262664.2_2        | OVCA2    | chr17:1945230-1946724    | -0.767469851 | 0.587446816 |
| 498 | ENSG00000173320.10_2       | STOX2    | chr4:184719175-184944679 | -0.766536735 | 0.587826891 |
| 499 | ENSG00000111678.10_1       | C12orf57 | chr12:7052141-7055166    | -0.765511657 | 0.588244709 |
| 500 | ENSG00000212719.10_2       | C17orf51 | chr17:21428051-21477722  | -0.765174603 | 0.588382155 |
| 501 | ENSG00000169851.15_2       | PCDH7    | chr4:30722037-31148427   | -0.764925583 | 0.588483723 |
| 502 | ENSG00000157326.18_1       | DHRS4    | chr14:24422795-24438488  | -0.763158317 | 0.589205043 |
| 503 | ENSG00000097007.17_2       | ABL1     | chr9:133589333-133763062 | -0.762313432 | 0.5895502   |
| 504 | ENSG00000173757.9_2        | STAT5B   | chr17:40351186-40428725  | -0.760786053 | 0.590174686 |
| 505 | ENSG00000127870.16_2       | RNF6     | chr13:26706253-26796630  | -0.759528822 | 0.590689216 |
| 506 | ENSG00000130766.4_1        | SESN2    | chr1:28586038-28609002   | -0.757550982 | 0.591499567 |
| 507 | ENSG00000070423.17_1       | RNF126   | chr19:647526-663277      | -0.757004172 | 0.5917238   |
| 508 | ENSG00000167333.12_2       | TRIM68   | chr11:4619902-4629489    | -0.755529134 | 0.592329099 |
| 509 | ENSG00000196236.12_1       | XPNPEP3  | chr22:41253081-41328819  | -0.755122827 | 0.59249594  |
| 510 | ENSG00000075234.16_2       | TTC38    | chr22:46663858-46689905  | -0.755041987 | 0.592529141 |
| 511 | ENSG00000136869.13_1       | TLR4     | chr9:120466610-120479149 | -0.75425927  | 0.592850698 |
| 512 | ENSG00000141384.12_2       | TAF4B    | chr18:23805900-23971649  | -0.753337717 | 0.593229515 |
| 513 | ENSG00000100138.13_1       | SNU13    | chr22:42069934-42086508  | -0.752026146 | 0.593769072 |
| 514 | ENSG00000136436.14_2       | CALCOCO2 | chr17:46908350-46943884  | -0.751870637 | 0.593833078 |
| 515 | ENSG00000123297.17_2       | TSMF     | chr12:58176372-58201854  | -0.750909767 | 0.594228717 |
| 516 | ENSG00000229809.8_1        | ZNF688   | chr16:30580667-30584055  | -0.750228869 | 0.594509237 |
| 517 | ENSG00000187193.8_2        | MT1X     | chr16:56716336-56718108  | -0.747161086 | 0.595774761 |
| 518 | ENSG00000040633.12_2       | PHF23    | chr17:7138347-7143041    | -0.746827261 | 0.595912634 |
| 519 | ENSG00000109184.14_1       | DCUN1D4  | chr4:52709166-52783003   | -0.746380277 | 0.596097291 |
| 520 | ENSG00000176209.11_1       | SMIM19   | chr8:42396298-42410336   | -0.744664828 | 0.596806508 |
| 521 | ENSG00000066322.13_2       | ELOVL1   | chr1:43829068-43833745   | -0.7432932   | 0.597374185 |
| 522 | ENSG00000175595.14_1       | ERCC4    | chr16:14014014-14046202  | -0.739834815 | 0.59880791  |
| 523 | ENSG00000174652.17_1       | ZNF266   | chr19:9523274-9546254    | -0.739743563 | 0.598845787 |
| 524 | ENSG00000178229.7_1        | ZNF543   | chr19:57831877-57842144  | -0.739019724 | 0.599146319 |
| 525 | ENSG00000181450.17_2       | ZNF678   | chr1:227751244-227865144 | -0.738086563 | 0.599533983 |
| 526 | ENSG00000170619.9_2        | COMMD5   | chr8:146066427-146079121 | -0.737150863 | 0.599922954 |
| 527 | ENSG00000146676.7_2        | PURB     | chr7:44915892-44924960   | -0.737142458 | 0.599926449 |
| 528 | ENSG00000196417.12_2       | ZNF765   | chr19:53893046-53933666  | -0.734315833 | 0.601103017 |
| 529 | ENSG00000118689.14_1       | FOXO3    | chr6:108881038-109005977 | -0.73426552  | 0.601123981 |
| 530 | ENSG00000178605.13_1_PAR_Y | GTPBP6   | chrY:171196-180884       | -0.73239975  | 0.601901889 |
| 531 | ENSG00000101347.8_1        | SAMHD1   | chr20:35518632-35580246  | -0.731665546 | 0.602208282 |
| 532 | ENSG00000152475.6_1        | ZNF837   | chr19:58878985-58892427  | -0.731135424 | 0.602429606 |
| 533 | ENSG00000167778.8_1        | SPRYD3   | chr12:53458100-53473204  | -0.729996966 | 0.602905182 |

|     |                      |                  |                           |              |             |
|-----|----------------------|------------------|---------------------------|--------------|-------------|
| 534 | ENSG00000134250.18_2 | NOTCH2           | chr1:120454176-120612240  | -0.72823759  | 0.603640877 |
| 535 | ENSG00000176894.9_2  | PXMP2            | chr12:133264192-133281577 | -0.725810778 | 0.604657139 |
| 536 | ENSG00000163818.16_2 | LZTFL1           | chr3:45864808-45957534    | -0.725374646 | 0.604839956 |
| 537 | ENSG00000145569.5_1  | FAM105A          | chr5:14581884-14615116    | -0.724922939 | 0.605029361 |
| 538 | ENSG00000164070.11_2 | HSPA4L           | chr4:128702976-128761888  | -0.721792973 | 0.606343414 |
| 539 | ENSG00000248871.1_2  | TNFSF12-TNFSF13  | chr17:7452416-7464918     | -0.720966591 | 0.606690829 |
| 540 | ENSG00000065970.8_1  | FOXJ2            | chr12:8185299-8208099     | -0.720705448 | 0.606800657 |
| 541 | ENSG00000198382.8_2  | UVRAG            | chr11:75526212-75854239   | -0.720400579 | 0.606928899 |
| 542 | ENSG00000120324.8_1  | PCDHB10          | chr5:140571926-140575215  | -0.720289849 | 0.606975484 |
| 543 | ENSG00000141569.10_1 | TRIM65           | chr17:73876416-73893084   | -0.719356387 | 0.60736834  |
| 544 | ENSG00000087301.8_2  | TXNDC16          | chr14:52897308-53019240   | -0.719202884 | 0.607432968 |
| 545 | ENSG00000124257.6_1  | NEURL2           | chr20:44517264-44519926   | -0.718449228 | 0.60775037  |
| 546 | ENSG00000124107.5_1  | SLPI             | chr20:43880880-43883205   | -0.717002356 | 0.608360186 |
| 547 | ENSG00000102974.14_1 | CTCF             | chr16:67596310-67673086   | -0.716423719 | 0.608604236 |
| 548 | ENSG00000242372.6_2  | EIF6             | chr20:33866710-33872788   | -0.715017069 | 0.609197924 |
| 549 | ENSG00000214194.8_2  | LINC00998        | chr7:112756773-112758668  | -0.714637194 | 0.609358353 |
| 550 | ENSG00000137834.14_2 | SMAD6            | chr15:66994566-67075186   | -0.71429075  | 0.6095047   |
| 551 | ENSG00000181027.10_2 | FKRP             | chr19:47249303-47280245   | -0.713125774 | 0.609997073 |
| 552 | ENSG00000167807.15_2 | CTD-2369P2.10    | chr19:10416103-10426685   | -0.713068295 | 0.610021377 |
| 553 | ENSG00000147400.8_1  | CETN2            | chrX:151995517-151999321  | -0.712390119 | 0.610308201 |
| 554 | ENSG00000134153.9_2  | EMC7             | chr15:34376218-34394149   | -0.711738828 | 0.610583781 |
| 555 | ENSG00000216490.3_2  | IFI30            | chr19:18283972-18288927   | -0.710687637 | 0.611028832 |
| 556 | ENSG00000277971.1_2  | XXbac-B562F10.12 | chr22:20783528-20800907   | -0.708359143 | 0.612015822 |
| 557 | ENSG00000147394.18_1 | ZNF185           | chrX:152082986-152142024  | -0.706698084 | 0.612720878 |
| 558 | ENSG00000137825.10_2 | ITPKA            | chr15:41785591-41795749   | -0.703874057 | 0.613921433 |
| 559 | ENSG00000099860.8_2  | GADD45B          | chr19:2476120-2478257     | -0.701868577 | 0.614775434 |
| 560 | ENSG00000143252.14_1 | SDHC             | chr1:161284047-161345130  | -0.701025357 | 0.615134861 |
| 561 | ENSG00000076351.12_2 | SLC46A1          | chr17:26721775-26734215   | -0.69783168  | 0.616498086 |
| 562 | ENSG00000185009.12_1 | AP3M1            | chr10:75880013-75910821   | -0.697816369 | 0.616504628 |
| 563 | ENSG00000051180.16_1 | RAD51            | chr15:40986972-41024537   | -0.697762786 | 0.616527527 |
| 564 | ENSG00000198682.12_1 | PAPSS2           | chr10:89419370-89507462   | -0.697326036 | 0.616714197 |
| 565 | ENSG00000107951.8    | MTPAP            | chr10:30598730-30663377   | -0.694603266 | 0.617879209 |
| 566 | ENSG00000131148.8_2  | EMC8             | chr16:85805364-85833214   | -0.694280575 | 0.618017427 |
| 567 | ENSG00000119900.7_1  | OGFRL1           | chr6:71998506-72018653    | -0.69420092  | 0.61805155  |
| 568 | ENSG00000155744.9_1  | FAM126B          | chr2:201838441-201936394  | -0.69380181  | 0.618222553 |
| 569 | ENSG00000035403.16_2 | VCL              | chr10:75754951-75881121   | -0.693367789 | 0.618408567 |
| 570 | ENSG00000168301.12_2 | KCTD6            | chr3:58477841-58488087    | -0.692053423 | 0.618972224 |
| 571 | ENSG00000179091.4_1  | CYC1             | chr8:145149930-145152428  | -0.691061254 | 0.61939805  |
| 572 | ENSG00000164687.10_1 | FABP5            | chr8:82192598-82197012    | -0.690879189 | 0.619476221 |
| 573 | ENSG00000259075.6_2  | POC1B-GALNT4     | chr12:89913185-89920039   | -0.690408126 | 0.619678523 |
| 574 | ENSG00000112852.6_2  | PCDHB2           | chr5:140474163-140478287  | -0.689309002 | 0.620150808 |
| 575 | ENSG00000010072.15_1 | SPRTN            | chr1:231472850-231490769  | -0.688362754 | 0.620557692 |
| 576 | ENSG00000116514.16_1 | RNF19B           | chr1:33402046-33430286    | -0.68779919  | 0.62080015  |
| 577 | ENSG00000158796.16_1 | DEDD             | chr1:161090764-161102478  | -0.687446011 | 0.620952143 |
| 578 | ENSG00000062370.16_2 | ZNF112           | chr19:44830708-44871377   | -0.687045892 | 0.621124383 |
| 579 | ENSG00000159388.5_1  | BTG2             | chr1:203274619-203278730  | -0.686351748 | 0.621423305 |
| 580 | ENSG00000163251.3_1  | FZD5             | chr2:208627310-208634287  | -0.6857554   | 0.621680228 |
| 581 | ENSG00000167565.12_2 | SERTAD3          | chr19:40946751-40950612   | -0.685641332 | 0.621729383 |
| 582 | ENSG00000255152.8_2  | MSH5-SAPCD1      | chr6:31707797-31732628    | -0.68543605  | 0.621817856 |

|     |                      |          |                           |              |             |
|-----|----------------------|----------|---------------------------|--------------|-------------|
| 583 | ENSG00000132383.11_1 | RPA1     | chr17:1732996-1803376     | -0.685098192 | 0.621963493 |
| 584 | ENSG00000011304.18_2 | PTBP1    | chr19:797075-812327       | -0.685014192 | 0.621999708 |
| 585 | ENSG00000164291.16_1 | ARSK     | chr5:94890778-94940768    | -0.6850015   | 0.62200518  |
| 586 | ENSG00000196411.9_1  | EPHB4    | chr7:100400187-100425143  | -0.684649128 | 0.622157121 |
| 587 | ENSG00000010704.18_2 | HFE      | chr6:26087509-26098571    | -0.684438236 | 0.622248074 |
| 588 | ENSG00000163975.11_2 | MELTF    | chr3:196715492-196756687  | -0.681789313 | 0.623391629 |
| 589 | ENSG00000173418.11_1 | NAA20    | chr20:19997760-20014299   | -0.681157831 | 0.623664553 |
| 590 | ENSG00000203778.7_1  | FAM229B  | chr6:112408802-112423993  | -0.679338777 | 0.624451411 |
| 591 | ENSG00000133328.3_1  | HRAALS2  | chr11:63320242-63330855   | -0.678619233 | 0.624762933 |
| 592 | ENSG00000116922.14_2 | C1orf109 | chr1:38147242-38157921    | -0.676105005 | 0.625852676 |
| 593 | ENSG00000151881.14_2 | TMEM267  | chr5:43444354-43483995    | -0.67602201  | 0.625888681 |
| 594 | ENSG00000020256.19_2 | ZFP64    | chr20:50668202-50820847   | -0.675839928 | 0.625967679 |
| 595 | ENSG00000112941.13_2 | PAPD7    | chr5:6713120-6757161      | -0.675367769 | 0.626172576 |
| 596 | ENSG00000213995.11_2 | NAXD     | chr13:111267807-111292340 | -0.675210254 | 0.626240946 |
| 597 | ENSG00000131504.15_1 | DIAPH1   | chr5:140894583-140998622  | -0.675100739 | 0.626288486 |
| 598 | ENSG00000148341.17_1 | SH3GLB2  | chr9:131769315-131790582  | -0.675089425 | 0.626293397 |
| 599 | ENSG00000155366.16_2 | RHOC     | chr1:113243728-113250056  | -0.672923439 | 0.627234388 |
| 600 | ENSG00000249115.8_2  | HAUS5    | chr19:36103646-36116251   | -0.672534711 | 0.627403416 |
| 601 | ENSG00000072210.18_2 | ALDH3A2  | chr17:19551449-19580911   | -0.671856875 | 0.627698264 |
| 602 | ENSG00000140718.19_2 | FTO      | chr16:53735604-54192424   | -0.671760087 | 0.627740377 |
| 603 | ENSG00000144048.10_1 | DUSP11   | chr2:73989311-74007284    | -0.66934697  | 0.628791242 |
| 604 | ENSG00000197037.10_2 | ZSCAN25  | chr7:99214569-99230030    | -0.6685306   | 0.629147154 |
| 605 | ENSG00000198874.12_1 | TYW1     | chr7:66460160-66704506    | -0.665538667 | 0.630453265 |
| 606 | ENSG00000100767.15_2 | PAPLN    | chr14:73704205-73741348   | -0.665157001 | 0.630620074 |
| 607 | ENSG00000134852.14_2 | CLOCK    | chr4:56294070-56413305    | -0.663575575 | 0.631311714 |
| 608 | ENSG00000164088.17_2 | PPM1M    | chr3:52279809-52284613    | -0.662776175 | 0.631661622 |
| 609 | ENSG00000148803.11_2 | FUOM     | chr10:135168658-135171539 | -0.661049658 | 0.632418003 |
| 610 | ENSG00000131788.15_2 | PIAS3    | chr1:145575233-145586546  | -0.657569667 | 0.633945329 |
| 611 | ENSG00000159069.13_2 | FBXW5    | chr9:139834887-139839148  | -0.656285608 | 0.634509818 |
| 612 | ENSG00000100221.10_2 | JOSD1    | chr22:39081548-39097561   | -0.65627002  | 0.634516674 |
| 613 | ENSG00000163453.11_1 | IGFBP7   | chr4:57896939-57976551    | -0.656065204 | 0.634606761 |
| 614 | ENSG00000125656.8_2  | CLPP     | chr19:6361463-6368919     | -0.655990689 | 0.634639539 |
| 615 | ENSG00000111880.15_1 | RNGTT    | chr6:89319991-89673440    | -0.654907059 | 0.635116405 |
| 616 | ENSG00000154380.17_2 | ENAH     | chr1:225674537-225840844  | -0.654407766 | 0.635336247 |
| 617 | ENSG00000114648.11_1 | KLHL18   | chr3:47324407-47388306    | -0.654321351 | 0.635374304 |
| 618 | ENSG00000100994.11_2 | PYGB     | chr20:25228705-25278650   | -0.653464036 | 0.635751984 |
| 619 | ENSG00000106144.19_1 | CASP2    | chr7:142985308-143004789  | -0.653256743 | 0.635843338 |
| 620 | ENSG00000173267.13_1 | SNCG     | chr10:88718375-88723017   | -0.652773825 | 0.636056212 |
| 621 | ENSG00000175879.8_1  | HOXD8    | chr2:176994422-176997423  | -0.65213045  | 0.636339927 |
| 622 | ENSG00000175115.11_2 | PACS1    | chr11:65837834-66012218   | -0.650922579 | 0.636872914 |
| 623 | ENSG00000168818.9_2  | STX18    | chr4:4417469-4544073      | -0.650201488 | 0.637191317 |
| 624 | ENSG00000163235.15_2 | TGFA     | chr2:70674412-70781325    | -0.649546289 | 0.637480762 |
| 625 | ENSG00000119661.14_1 | DNAL1    | chr14:74111578-74170435   | -0.649298881 | 0.637590094 |
| 626 | ENSG00000198223.16_2 | CSF2RA   | chrX:1387693-1429274      | -0.648514767 | 0.637936722 |
| 627 | ENSG00000043093.13_2 | DCUN1D1  | chr3:182655862-182703741  | -0.647764804 | 0.63826843  |
| 628 | ENSG00000136982.5_2  | DSCC1    | chr8:120846216-120868250  | -0.647082322 | 0.638570441 |
| 629 | ENSG00000104691.14_2 | UBXN8    | chr8:30589764-30624522    | -0.64610342  | 0.639003873 |
| 630 | ENSG00000072736.18_2 | NFATC3   | chr16:68118654-68263162   | -0.643190758 | 0.640295263 |
| 631 | ENSG00000157193.15_2 | LRP8     | chr1:53708036-53793742    | -0.642952239 | 0.640401131 |

|     |                      |          |                           |              |             |
|-----|----------------------|----------|---------------------------|--------------|-------------|
| 632 | ENSG00000110344.9_1  | UBE4A    | chr11:118230300-118269926 | -0.641912553 | 0.640862806 |
| 633 | ENSG00000243667.6_2  | WDR92    | chr2:68350068-68384692    | -0.641716417 | 0.640949938 |
| 634 | ENSG00000174917.8_1  | C19orf70 | chr19:5678432-5680907     | -0.640893977 | 0.641315429 |
| 635 | ENSG00000101079.20_1 | NDRG3    | chr20:35280169-35374481   | -0.640782095 | 0.641365166 |
| 636 | ENSG00000104880.17_2 | ARHGEF18 | chr19:7459999-7537363     | -0.639850962 | 0.641779244 |
| 637 | ENSG00000213145.9_2  | CRIP1    | chr14:105952654-105955284 | -0.639562736 | 0.641907474 |
| 638 | ENSG00000104081.13_2 | BMF      | chr15:40380091-40401093   | -0.639195617 | 0.642070839 |
| 639 | ENSG00000118707.9_2  | TGIF2    | chr20:35201891-35222353   | -0.638790556 | 0.642251137 |
| 640 | ENSG00000110583.12_1 | NAA40    | chr11:63706431-63724800   | -0.638534557 | 0.642365111 |
| 641 | ENSG00000103429.10_1 | BFAR     | chr16:14726672-14763093   | -0.638354603 | 0.642445242 |
| 642 | ENSG00000116525.13_1 | TRIM62   | chr1:33611003-33647660    | -0.637790094 | 0.642696671 |
| 643 | ENSG00000165072.9_2  | MAMDC2   | chr9:72658497-72841886    | -0.637256917 | 0.642934237 |
| 644 | ENSG00000165886.4_1  | UBTD1    | chr10:99258625-99330966   | -0.635793671 | 0.643586661 |
| 645 | ENSG00000198522.13_2 | GPN1     | chr2:27851114-27874375    | -0.635426166 | 0.643750625 |
| 646 | ENSG00000160271.14_2 | RALGDS   | chr9:135973107-136024721  | -0.634947787 | 0.64396412  |
| 647 | ENSG00000002919.14_1 | SNX11    | chr17:46180719-46200436   | -0.634558019 | 0.644138121 |
| 648 | ENSG00000262484.1_1  | CCER2    | chr19:39399620-39402798   | -0.63442702  | 0.644196613 |
| 649 | ENSG00000183671.12_2 | GPR1     | chr2:207040040-207082771  | -0.634102937 | 0.644341339 |
| 650 | ENSG00000125970.11_2 | RALY     | chr20:32581452-32696114   | -0.632987497 | 0.644839714 |
| 651 | ENSG00000128699.13_2 | ORMDL1   | chr2:190635049-190649097  | -0.631053846 | 0.645704575 |
| 652 | ENSG00000132376.19_2 | INPP5K   | chr17:1397865-1420182     | -0.630048041 | 0.646154898 |
| 653 | ENSG00000141627.13_2 | DYM      | chr18:46567844-46987717   | -0.629783823 | 0.646273247 |
| 654 | ENSG00000165637.13_1 | VDAC2    | chr10:76969912-76991206   | -0.629575952 | 0.646366373 |
| 655 | ENSG00000075303.12_1 | SLC25A40 | chr7:87462883-87505672    | -0.629558586 | 0.646374153 |
| 656 | ENSG00000215271.7_2  | HOMEZ    | chr14:23741631-23768656   | -0.62811658  | 0.647020541 |
| 657 | ENSG00000196689.11_2 | TRPV1    | chr17:3468738-3512705     | -0.626781854 | 0.647619417 |
| 658 | ENSG00000159128.14_2 | IFNGR2   | chr21:34775202-34851655   | -0.626060444 | 0.647943336 |
| 659 | ENSG00000175874.9_1  | CREG2    | chr2:101962013-102004057  | -0.626031062 | 0.647956532 |
| 660 | ENSG00000041802.10_1 | LSG1     | chr3:194361517-194393206  | -0.623711332 | 0.648999228 |
| 661 | ENSG00000146802.12_1 | TMEM168  | chr7:112402437-112430647  | -0.6235765   | 0.649059886 |
| 662 | ENSG00000213648.10_2 | SULT1A4  | chr16:29471210-29476297   | -0.623474318 | 0.649105858 |
| 663 | ENSG00000187098.14_2 | MITF     | chr3:69788586-70017488    | -0.623004265 | 0.649317382 |
| 664 | ENSG00000168872.16_2 | DDX19A   | chr16:70380732-70407286   | -0.622312465 | 0.649628817 |
| 665 | ENSG00000140995.16_2 | DEF8     | chr16:90014333-90034468   | -0.622277899 | 0.649644382 |
| 666 | ENSG00000166510.13_1 | CCDC68   | chr18:52568740-52626739   | -0.621133887 | 0.650159733 |
| 667 | ENSG00000088205.12_1 | DDX18    | chr2:118572226-118589955  | -0.620558975 | 0.650418873 |
| 668 | ENSG00000156030.13_2 | ELMSAN1  | chr14:74181825-74256988   | -0.62051663  | 0.650437964 |
| 669 | ENSG00000188610.8    | FAM72B   | chr1:120837756-120855681  | -0.620421853 | 0.650480695 |
| 670 | ENSG00000133740.10_1 | E2F5     | chr8:86089460-86129387    | -0.620368034 | 0.650504962 |
| 671 | ENSG00000099256.18_1 | PRTFDC1  | chr10:25137536-25241533   | -0.620337086 | 0.650518916 |
| 672 | ENSG00000120705.12_2 | ETF1     | chr5:137841784-137878989  | -0.620071568 | 0.650638651 |
| 673 | ENSG00000123213.22_2 | NLN      | chr5:65018023-65167553    | -0.617892363 | 0.651622189 |
| 674 | ENSG00000196757.7_2  | ZNF700   | chr19:12035883-12061588   | -0.616461668 | 0.652268712 |
| 675 | ENSG00000115738.9_1  | ID2      | chr2:8818975-8824583      | -0.615832142 | 0.652553394 |
| 676 | ENSG00000154146.12_1 | NRGN     | chr11:124609742-124617106 | -0.614845479 | 0.65299983  |
| 677 | ENSG00000115649.15_1 | CNPPD1   | chr2:220036619-220042828  | -0.614099192 | 0.653337705 |
| 678 | ENSG00000197930.12_2 | ERO1A    | chr14:53106634-53162618   | -0.61394093  | 0.65340938  |
| 679 | ENSG00000165948.10_2 | IFI27L1  | chr14:94547628-94570192   | -0.612159246 | 0.654216819 |
| 680 | ENSG00000178773.14_2 | CPNE7    | chr16:89642176-89663654   | -0.612016879 | 0.654281381 |

|     |                      |               |                          |              |             |
|-----|----------------------|---------------|--------------------------|--------------|-------------|
| 681 | ENSG00000150457.8_1  | LATS2         | chr13:21547171-21635686  | -0.61078168  | 0.6548418   |
| 682 | ENSG00000140836.14_2 | ZFHX3         | chr16:72816784-73093597  | -0.610713446 | 0.654872772 |
| 683 | ENSG00000125741.4_2  | OPA3          | chr19:46030685-46105470  | -0.610701835 | 0.654878043 |
| 684 | ENSG00000141750.6_1  | STAC2         | chr17:37366789-37382125  | -0.610253467 | 0.655081601 |
| 685 | ENSG00000132613.14_1 | MTSSL1        | chr16:70695107-70719969  | -0.609745589 | 0.655312252 |
| 686 | ENSG00000100983.9_1  | GSS           | chr20:33516233-33543620  | -0.609416366 | 0.655461811 |
| 687 | ENSG00000204237.4_2  | OXLD1         | chr17:79632066-79633665  | -0.608279448 | 0.655978553 |
| 688 | ENSG00000160190.13_2 | SLC37A1       | chr21:43916118-44001550  | -0.607240471 | 0.656451135 |
| 689 | ENSG00000133884.9_1  | DPF2          | chr11:65101225-65120720  | -0.606393133 | 0.656836802 |
| 690 | ENSG00000161921.14_1 | CXCL16        | chr17:4636821-4643217    | -0.606182301 | 0.656932797 |
| 691 | ENSG00000108679.12_2 | LGALS3BP      | chr17:76967320-76976191  | -0.604431385 | 0.657730563 |
| 692 | ENSG00000143570.17_2 | SLC39A1       | chr1:153931575-153940660 | -0.604118441 | 0.657873251 |
| 693 | ENSG00000125968.8_1  | ID1           | chr20:30193086-30194318  | -0.603393954 | 0.658203702 |
| 694 | ENSG00000197502.1    | AL627171.1    | chr14:50300810-50311552  | -0.60296325  | 0.658400232 |
| 695 | ENSG00000135441.7_2  | BLOC1S1       | chr12:56109821-56113871  | -0.602231209 | 0.658734398 |
| 696 | ENSG00000161513.11_1 | FDXR          | chr17:72858619-72869156  | -0.601374563 | 0.659125658 |
| 697 | ENSG00000167705.11_2 | RILP          | chr17:1549439-1553371    | -0.601319386 | 0.659150867 |
| 698 | ENSG00000172992.11_1 | DCAKD         | chr17:43100708-43138477  | -0.601093569 | 0.659254048 |
| 699 | ENSG00000172531.14_1 | PPP1CA        | chr11:67165654-67188654  | -0.600001137 | 0.659753435 |
| 700 | ENSG00000266086.1_2  | RP11-159D12.5 | chr17:56066399-56082614  | -0.599751812 | 0.659867463 |
| 701 | ENSG00000135480.14_2 | KRT7          | chr12:52626304-52645970  | -0.599659768 | 0.659909564 |
| 702 | ENSG00000228672.3_1  | PROB1         | chr5:138726281-138731402 | -0.599228277 | 0.660106964 |
| 703 | ENSG00000169891.17_1 | REPS2         | chrX:16964814-17171403   | -0.598398305 | 0.660486828 |
| 704 | ENSG00000170264.12_1 | FAM161A       | chr2:62051989-62081278   | -0.598299689 | 0.660531977 |
| 705 | ENSG00000196812.4_1  | ZSCAN16       | chr6:28092338-28097860   | -0.597842848 | 0.660741173 |
| 706 | ENSG00000188959.9_1  | C9orf152      | chr9:112952328-112970469 | -0.59752419  | 0.660887132 |
| 707 | ENSG00000138613.13_2 | APH1B         | chr15:63568217-63601325  | -0.597054791 | 0.661102195 |
| 708 | ENSG00000171174.9    | RBKS          | chr2:28004231-28113965   | -0.595673501 | 0.661735462 |
| 709 | ENSG00000197746.13_1 | PSAP          | chr10:73576055-73611132  | -0.594695958 | 0.662183993 |
| 710 | ENSG00000160352.11   | ZNF714        | chr19:21264965-21308073  | -0.594419806 | 0.662310757 |
| 711 | ENSG00000065243.19_2 | PKN2          | chr1:89149905-89301938   | -0.594288013 | 0.662371263 |
| 712 | ENSG00000132286.11_2 | TIMM10B       | chr11:6502677-6505909    | -0.594283699 | 0.662373243 |
| 713 | ENSG00000177839.6_2  | PCDHB9        | chr5:140566701-140571114 | -0.594228151 | 0.662398747 |
| 714 | ENSG00000110057.7_2  | UNC93B1       | chr11:67758575-67772452  | -0.591011869 | 0.663877118 |
| 715 | ENSG00000007866.18_2 | TEAD3         | chr6:35441374-35464853   | -0.589580775 | 0.664535983 |
| 716 | ENSG00000184281.14_2 | TSSC4         | chr11:2421718-2425108    | -0.589321362 | 0.664655485 |
| 717 | ENSG00000175582.19_1 | RAB6A         | chr11:73386683-73472182  | -0.589007064 | 0.664800299 |
| 718 | ENSG00000099804.8_1  | CDC34         | chr19:531712-542092      | -0.587673346 | 0.665415166 |
| 719 | ENSG00000029639.10_1 | TFB1M         | chr6:155578643-155635627 | -0.587469644 | 0.665509126 |
| 720 | ENSG00000166016.5_2  | ABTB2         | chr11:34172535-34379555  | -0.586713116 | 0.665858201 |

---

**Supporting Table S3. Top 10 terms of GO\_BP analysis in mGPDH over-expressed LO2 cells.**

| GO.ID      | Term                                             | Ontology        | Count | Pop. Hits | List. Total | Pop. Total | Fold. Enrichment | P value | FDR    | Enrichment. Score | Gene. Ratio | GENES                                 |
|------------|--------------------------------------------------|-----------------|-------|-----------|-------------|------------|------------------|---------|--------|-------------------|-------------|---------------------------------------|
| GO:0044237 | Cellular metabolic process                       | Biological proc | 6735  | 9979      | 9801        | 16672      | 1.148068734      | 4E-171  | 3E-167 | 170.3630809       | 0.6871748   | SIRT1//LIG4//APTXX/TDP1//XRCC1//ALYRE |
| GO:0034641 | Cellular nitrogen compound metabolic process     | Biological proc | 4554  | 6338      | 9801        | 16672      | 1.222244534      | 2E-162  | 6E-159 | 161.7362646       | 0.4646465   | SIRT1//LIG4//APTXX/TDP1//XRCC1//ALYRE |
| GO:0006807 | Nitrogen compound metabolic process              | Biological proc | 4795  | 6778      | 9801        | 16672      | 1.203384351      | 2E-151  | 4E-148 | 150.6818211       | 0.4892358   | SIRT1//LIG4//APTXX/TDP1//XRCC1//ALYRE |
| GO:0044260 | Cellular macromolecule metabolic process         | Biological proc | 5655  | 8217      | 9801        | 16672      | 1.170675784      | 9E-150  | 1E-146 | 149.0679567       | 0.5769819   | SIRT1//LIG4//APTXX/TDP1//XRCC1//ALYRE |
| GO:0044238 | Primary metabolic process                        | Biological proc | 6667  | 9992      | 9801        | 16672      | 1.134998643      | 6E-143  | 8E-140 | 142.2169079       | 0.6802367   | SIRT1//LIG4//APTXX/TDP1//XRCC1//ALYRE |
| GO:0008152 | Metabolic process                                | Biological proc | 7119  | 10818     | 9801        | 16672      | 1.119410376      | 1E-137  | 1E-134 | 136.9930892       | 0.7263545   | SIRT1//LIG4//APTXX/TDP1//XRCC1//ALYRE |
| GO:0006139 | Nucleobase-containing compound metabolic process | Biological proc | 4054  | 5647      | 9801        | 16672      | 1.221190084      | 4E-135  | 3E-132 | 134.4299425       | 0.4136313   | SIRT1//LIG4//APTXX/TDP1//XRCC1//ALYRE |
| GO:0071704 | Organic substance metabolic process              | Biological proc | 6894  | 10449     | 9801        | 16672      | 1.122312661      | 1E-131  | 1E-128 | 130.8647744       | 0.7033976   | SIRT1//LIG4//APTXX/TDP1//XRCC1//ALYRE |
| GO:0046483 | Heterocycle metabolic process                    | Biological proc | 4114  | 5771      | 9801        | 16672      | 1.212636191      | 6E-129  | 4E-126 | 128.2232406       | 0.4197531   | SIRT1//LIG4//APTXX/TDP1//XRCC1//ALYRE |
| GO:0006725 | Cellular aromatic compound metabolic process     | Biological proc | 4137  | 5819      | 9801        | 16672      | 1.20935687       | 2E-126  | 9E-124 | 125.8225949       | 0.4220998   | SIRT1//LIG4//APTXX/TDP1//XRCC1//ALYRE |

**Supporting Table S4. Top 10 terms of KEGG analysis for all differentially expressed genes in mGPDH over-expressed LO2 cells.**

**Down-regulated pathway:**

| Pathway ID | Definition                                  | Size | Enrichment Score | P value  | FDR     | Selection Counts | Selection Size | Count | Gene Ratio | Genes                                                                                                             |
|------------|---------------------------------------------|------|------------------|----------|---------|------------------|----------------|-------|------------|-------------------------------------------------------------------------------------------------------------------|
| hsa04141   | Protein processing in endoplasmic reticulum | 5869 | 3.93206          | 0.000117 | 0.00117 | 16               | 197            | 165   | 0.081      | ATF4//HSPA1B//SSR3//UBE2G2//XBP1//MOGS//EDEM1//MAN1A2//CKAP4//HSPA4L//TRAM1//ERO1A//MBTPS2//YOD1//UBQLN4//DNAJC5  |
| hsa04350   | TGF-beta signaling pathway                  | 5869 | 2.72635          | 0.001878 | 0.00939 | 9                | 197            | 84    | 0.046      | AMH//CDKN2B//E2F5//ID1//ID2//ID3//SMAD6//TFDP1//TGFB1                                                             |
| hsa04130   | SNARE interactions in vesicular transport   | 5869 | 2.18408          | 0.006545 | 0.02182 | 5                | 197            | 36    | 0.025      | STX5//VAMP5//BET1L//STX18//VTG1A                                                                                  |
| hsa05130   | Pathogenic Escherichia coli infection       | 5869 | 1.97255          | 0.010652 | 0.02663 | 6                | 197            | 56    | 0.03       | ABL1//TLR4//TUBA1A//WASL//ARPC5//YWHAQ                                                                            |
| hsa05131   | Shigellosis                                 | 5869 | 1.79923          | 0.015877 | 0.03175 | 6                | 197            | 61    | 0.03       | ABL1//DIAPH1//RAC1//VCL//WASL//ARPC5                                                                              |
| hsa04110   | Cell cycle                                  | 5869 | 1.63797          | 0.023016 | 0.03663 | 9                | 197            | 124   | 0.046      | ABL1//CDKN2B//E2F3//E2F5//SFN//GADD45B//TFDP1//TGFB1//YWHAQ                                                       |
| hsa05211   | Renal cell carcinoma                        | 5869 | 1.53301          | 0.029308 | 0.03663 | 6                | 197            | 70    | 0.03       | RAC1//TGFA//TGFB1//VHL//EGLN1//EGLN3                                                                              |
| hsa05212   | Pancreatic cancer                           | 5869 | 1.53301          | 0.029308 | 0.03663 | 6                | 197            | 70    | 0.03       | E2F3//RAC1//RAD51//RALGDS//TGFA//TGFB1                                                                            |
| hsa00562   | Inositol phosphate metabolism               | 5869 | 1.38276          | 0.041423 | 0.04584 | 5                | 197            | 57    | 0.025      | ITPK1//ITPKA//INPP5K//PI4K2B//IPPK                                                                                |
| hsa05200   | Pathways in cancer                          | 5869 | 1.33877          | 0.045838 | 0.04584 | 17               | 197            | 326   | 0.086      | ABL1//CDKN2B//CSF2RA//E2F3//FOXO1//MITF//RAC1//RAD51//RALGDS//STAT5B//TGFA//TGFB1//VHL//FZD5//PIAS3//EGLN1//EGLN3 |



**Up-regulated pathway:**

| Pathway ID | Definition                              | Size | Enrichment Score | P value | FDR    | Selection Counts | Selection Size | Count | Gene Ratio | Genes                                                                             |
|------------|-----------------------------------------|------|------------------|---------|--------|------------------|----------------|-------|------------|-----------------------------------------------------------------------------------|
| hsa00750   | Vitamin B6 metabolism                   | 5869 | 3.2476           | 0.0006  | 0.0062 | 3                | 184            | 6     | 0.0163     | PDXK//PSAT1//PDXP                                                                 |
| hsa00471   | D-Glutamine and D-glutamate metabolism  | 5869 | 2.2498           | 0.0056  | 0.0213 | 2                | 184            | 4     | 0.0109     | GLS//GLUD1                                                                        |
| hsa03040   | Spliceosome                             | 5869 | 2.2025           | 0.0063  | 0.0213 | 10               | 184            | 127   | 0.0543     | HSPA1A//NCBP1//TXNL4A//NCBP2//CDC40//SF3B6//PPIL1//LSM7//PHF5A//ZMAT2             |
| hsa00620   | Pyruvate metabolism                     | 5869 | 2.1108           | 0.0077  | 0.0213 | 5                | 184            | 40    | 0.0272     | ACYP1//ALDH1B1//AKR1B1//DLAT//ACSS2                                               |
| hsa04144   | Endocytosis                             | 5869 | 1.6292           | 0.0235  | 0.0412 | 12               | 184            | 201   | 0.0652     | CBL//HSPA1A//MET//RAB4A//RAB5B//TGFB1//CXCR4//RNF41//RAB31//EHD4//SH3GLB1//CHMP1B |
| hsa04120   | Ubiquitin mediated proteolysis          | 5869 | 1.5954           | 0.0254  | 0.0412 | 9                | 184            | 135   | 0.0489     | CBL//UBE2B//UBE2D3//CUL5//CUL4B//UBA3//ANAPC13//FBXO2//CDC26                      |
| hsa00330   | Arginine and proline metabolism         | 5869 | 1.5811           | 0.0262  | 0.0412 | 5                | 184            | 54    | 0.0272     | ALDH1B1//ARG2//GLS//GLUD1//P4HA1                                                  |
| hsa00910   | Nitrogen metabolism                     | 5869 | 1.4704           | 0.0339  | 0.0414 | 3                | 184            | 23    | 0.0163     | GLS//GLUD1//CA5B                                                                  |
| hsa04964   | Proximal tubule bicarbonate reclamation | 5869 | 1.4704           | 0.0339  | 0.0414 | 3                | 184            | 23    | 0.0163     | ATP1B1//GLS//GLUD1                                                                |
| hsa04380   | Osteoclast differentiation              | 5869 | 1.3267           | 0.0471  | 0.0479 | 8                | 184            | 128   | 0.0435     | CREB1//FOS//IFNAR1//JUNB//NFKBIA//MAP2K1//MAP3K7//TGFB1                           |

**Supporting Table S5. Differential changed genes regarding "protein processing in endoplasmic reticulum" item of KEGG analysis**

| No. | Track_id             | Gene_Name | log2(fold_change) | Fold_Change |
|-----|----------------------|-----------|-------------------|-------------|
| 1   | ENSG00000204388.6_2  | HSPA1B    | -7.021933907      | 0.007694622 |
| 2   | ENSG00000136026.13_2 | CKAP4     | -4.963434422      | 0.032052164 |
| 3   | ENSG00000180667.10_1 | YOD1      | -2.044546011      | 0.242398721 |
| 4   | ENSG00000101152.10_1 | DNAJC5    | -1.838397873      | 0.279632146 |
| 5   | ENSG00000128272.14_1 | ATF4      | -1.757020835      | 0.295858483 |
| 6   | ENSG00000134109.10_1 | EDEM1     | -1.340689332      | 0.394831957 |
| 7   | ENSG00000012174.11_2 | MBTPS2    | -1.323049319      | 0.399689251 |
| 8   | ENSG00000184787.18_1 | UBE2G2    | -1.322281152      | 0.399902124 |
| 9   | ENSG00000160803.7_1  | UBQLN4    | -1.019186016      | 0.493394652 |
| 10  | ENSG00000100219.16_2 | XBP1      | -1.010623761      | 0.496331608 |
| 11  | ENSG00000115275.11_2 | MOGS      | -0.952922935      | 0.516584788 |
| 12  | ENSG00000198162.12_2 | MAN1A2    | -0.861377371      | 0.550426803 |
| 13  | ENSG00000067167.7_1  | TRAM1     | -0.833792568      | 0.561052403 |
| 14  | ENSG00000114850.6_1  | SSR3      | -0.807535978      | 0.571356863 |
| 15  | ENSG00000164070.11_2 | HSPA4L    | -0.721792973      | 0.606343414 |
| 16  | ENSG00000197930.12_2 | ERO1A     | -0.61394093       | 0.65340938  |
